# Supplementary material for: Transcriptome Analysis of Pecan (Carya illinoinensis) Differentially Expressed Genes in Response to Drought Stress
Source: MDPI journal article supplement (doi:10.3390/f14030608), 2023-03-18
Supplement: s1 [file s1]

Archive with 2 entries (2 files):
- Supplementary Figures.pdf
- Supplementary Tables.xlsx
