# Supplementary material for: Transcriptome Analysis of Pecan (Carya illinoinensis) Differentially Expressed Genes in Response to Drought Stress
Source: MDPI journal article supplement (doi:10.3390/f14030608), 2023-03-18
Supplement: s1 [file s1 › Supplementary Tables.xlsx]

## Sheet: Table S1
Table S1. Specific primers of selected genes for qRT-PCR analysis.
Gene ID	Sequence
CIL1155S0051 F	ACAGGGAGAAGATGACTCAAATC
CIL1155S0051 R	CACTGGCATACAGAGAGAGAAC
CIL1090S0050 F	GCTTTCGATCTGATCTCGTTCT
CIL1090S0050 R	GGTCTTTCCTCCGACATGAAT
CIL1406S0036 F	GGTCTGTGGGTTGCATCTT
CIL1406S0036 R	CTTCCCAAGGAGCTCTATCAAC
CIL1167S0055 F	GGGCTTACTTCCTAACCTCAAG
CIL1167S0055 R	GAGCAGATCGCCATCCATAAA
CIL1429S0039 F	GACAGCAACGAGGTTGGTAA
CIL1429S0039 R	GGGATCGGTTTCCACGTATT
CIL0149S0012 F	GTGACCTCAAACCATCGAATCT
CIL0149S0012 R	GTCCAACGTACGGCACATAA
CIL1127S0040 F	GACCACTCCCACCTGAATTT
CIL1127S0040 R	CATCAGTCCATCAGGAGGTAAG
CIL1499S0043 F	CACCACCATGAACAACAACTC
CIL1499S0043 R	TTTCGGCGTAGAGCAGTATC
CIL1047S0142 F	GGGCGAGAGATTTACTGAGATAG
CIL1047S0142 R	CTCCAGCACTCCAAACATCTA
CIL1444S0032 F	GACAAGCGTTTCGAGCAAAG
CIL1444S0032 R	GGCTAAGAAGCGGTCATCAA
CIL1078S0094 F	TCGTCTTCGTCCCACTTAGA
CIL1078S0094 R	CATGCTGTTGGTTCCTGAGA
CIL1383S0019 F	ACGGTGGATGATGGGATTTC
CIL1383S0019 R	AGCATGTCTCTCAGCCTTTG
CIL0902S0177 F	CGCCAGTTTAGGTAGCTTGTATC
CIL0902S0177 R	GAGCACGTAATAGAGCAGCATATC
CIL1570S0023 F	GCATATGAGGCGGCATAGA
CIL1570S0023 R	CAGACAACCCTCGTACTGTTAG
CIL0984S0056 F	GGGTCTGAAACGGATCGTAATG
CIL0984S0056 R	GACCTGGCTCCTTGTTTGAA
CIL1106S0004 F	CAGGACAAGATGACAGCTAAGG
CIL1106S0004 R	CTCCCACCACCAGAAGATAATG
CIL0893S0173 F	CCGTCTTCGATGGACTAACTATC
CIL0893S0173 R	CAGACCACTTGTTTCCCAGTA

## Sheet: Table S2
Table S2. Statistics of transcriptome data from 18 libraries in pecan
Samples	Total Reads	Clean reads	Mapped Reads	GC Content	%≥Q30
0 d-1	47164520	47018868 (99.69%)	44856788 (95.46%)	0.4525	0.9363
0 d-2	34524474	34436808 (99.75%)	32781820 (95.26%)	0.4535	0.942
0 d-3	38123480	38017812 (99.72%)	36097472 (95.02%)	0.4504	0.9425
3 d-1	39120126	39011370 (99.72%)	41569231 (94.59%)	0.4535	0.94
3 d-2	35630644	35538954 (99.74%)	45745167 (95.15%)	0.4494	0.9418
3 d-3	40786010	40672950 (99.72%)	44401078 (93.53%)	0.4539	0.9435
6 d-1	39392126	39275176 (99.70%)	41347649 (92.46%)	0.4499	0.9389
6 d-2	40981002	40887196 (99.77%)	43973762 (90.80%)	0.4493	0.9432
6 d-3	45158922	45047682 (99.75%)	40402132 (93.25%)	0.4489	0.9411
9 d-1	38221644	38134764 (99.77%)	36490067 (93.64%)	0.4526	0.9411
9 d-2	39910226	39796340 (99.71%)	33546087 (94.46%)	0.4473	0.9434
9 d-3	40233520	40137724 (99.76%)	37905611 (93.26%)	0.447	0.9432
12 d-1	44095114	43976308 (99.73%)	36719986 (93.55%)	0.4483	0.9443
12 d-2	48229194	48104570 (99.74%)	38318456 (93.80%)	0.4473	0.9451
12 d-3	47645130	47516010 (99.73%)	41711281 (92.64%)	0.4506	0.9435
15 d-1	44929278	44805260 (99.72%)	36030368 (94.54%)	0.4506	0.9436
15 d-2	48722556	48545938 (99.64%)	37336772 (93.87%)	0.4497	0.9431
15 d-3	43519392	43380804 (99.68%)	37584616 (93.70%)	0.451	0.9317

## Sheet: Table S3
Table S3. FPKM expression values of all differentially expressed genes during drought response of pecan.
Gene ID	0 d	3 d	6 d	9 d	12 d	15 d
CIL1449S0008	30.65	56.75	163.03	611.033	5928.08	26918.8
CIL1459S0009	17.537	37.84	138.247	3199.86	3957.37	5121.95
CIL0993S0094	8.79	14.553	17.53	410.263	1186.74	3598.46
CIL0392S0012	5.077	8.797	61.98	538.77	1455.86	3530.23
CIL1061S0081	3.153	6.047	7.49	75.617	652.353	3279.25
CIL0461S0006	1431.69	1367.87	1835.68	2405.78	2824.51	3278.93
CIL1449S0006	3.257	7.183	6.827	53.88	438.297	3197.49
CIL1317S0076	15.343	27.567	172.923	580.37	1273.69	3111.71
CIL0929S0040	11.657	25.453	86.07	151.933	238.937	3086.28
CIL0037S0002	36.883	62.093	174.093	2635.71	3840.68	2828.15
CIL1043S0080	6.157	9.663	87.13	193.943	388.757	2718.69
CIL1175S0049	6.783	11.307	43.01	152.507	656.113	2520.5
CIL1358S0031	6.523	31.18	169.44	1146.15	1625.13	2412.87
CIL1429S0030	3.487	8.65	14.087	646.01	1003.63	2252.1
CIL0352S0003	298.967	338.767	482.41	1023.48	1155.55	2238.12
CIL1611S0019	1037.86	1025.94	997.857	1493.55	1774.6	2168.49
CIL1587S0005	21.9	34.52	125.84	538.5	1061.21	2114.16
CIL1020S0108	5.933	14.377	43.067	287.603	1058.28	2049.33
CIL0970S0039	40.74	39.663	474.757	730.177	1034.55	1933.56
CIL0921S0079	2.987	5.563	17.263	398.817	480.423	1811.59
CIL1235S0008	2.727	3.59	148.417	162.83	365.453	1676.96
CIL1444S0032	6.397	12.937	279.997	370.783	498.437	1474.36
CIL1402S0020	191.603	480.213	626.457	1067.19	1285.24	1350.25
CIL1002S0062	226.333	204.403	737.6	789.787	969.673	1338.13
CIL0922S0220	3896.34	2061.64	2002.9	2577.44	1941.43	1333.39
CIL1166S0013	2.633	5.03	1164	598.25	198.057	1297.83
CIL0955S0001	30.83	60.06	117.877	118.307	289.443	1253.25
CIL1246S0063	337.5	441.56	454.05	816.71	1024.99	1233.55
CIL1193S0031	1.427	1.853	4.637	20.957	91.133	1208.97
CIL1443S0019	41.02	4.623	26.74	30.92	162.157	1153.37
CIL1107S0023	546.08	518.193	758.733	969.637	1122.72	1131.17
CIL0937S0044	19.15	24.567	120.1	170.68	373.397	1097.76
CIL0940S0027	1.03	3.09	3.973	18.803	239.433	1065.45
CIL0919S0018	285.587	311.9	547.93	691.883	857.62	1060.72
CIL1167S0033	20.537	44.847	63.437	224.77	456.123	1037.81
CIL0935S0032	1.5	6.443	22.507	136.143	329.257	1018.08
CIL1405S0077	14.933	11.883	23.823	429.943	566.18	1015.26
CIL0957S0025	2.097	4.5	6.057	87.88	259.477	988.027
CIL1078S0094	6.1	7.637	106.46	239.17	316.26	980.26
CIL0324S0018	119.123	103.537	197.43	297.513	525.587	946.38
CIL1358S0026	0.757	1.737	1.617	4.167	84.667	918.64
CIL1153S0096	1.013	1.917	2.353	9.067	155.15	895.87
CIL0922S0228	7.777	8.483	9.85	150.357	341.043	886.75
CIL0486S0001	10.44	20.893	24.65	434.203	432.103	836.603
CIL1245S0045	223.77	149	528.207	927.573	1089.24	825.533
CIL0320S0009	93.493	66.697	327.723	1343.38	1438.04	823.62
CIL0644S0015	16.56	31.773	89.603	190.58	297.547	806.26
CIL1082S0103	1.737	2.5	49.983	54.813	165.887	806.183
CIL0893S0430	6.533	45.127	153.283	188.62	399.427	803.487
CIL1500S0024	0.803	2.093	11.17	190.487	287.643	788.05
CIL0156S0018	39.523	73.16	96.91	410.56	586.98	775.533
CIL1179S0022	1.303	3.49	81.513	336.183	389.443	762.793
CIL0978S0022	42.23	143.88	761.5	443.39	370.733	744.277
CIL1265S0039	1.087	14.7	101.883	204.923	296.797	714.503
CIL1273S0008	14.907	15.663	130.053	294.787	365.777	711.243
CIL0967S0236	22.41	31.803	159.477	384.15	523.47	710.873
CIL1383S0019	24.093	37.15	142.103	194.12	270.897	696.597
CIL0940S0080	155.973	202.037	180.66	157.817	199.39	688.44
CIL0212S0004	42.697	567.107	207.923	100.903	156.263	680.663
CIL1028S0076	142.453	109.567	345.883	505.497	672.947	675.917
CIL0803S0001	6.717	10.823	15.86	46.433	138.72	670.107
CIL0902S0177	48.91	31.563	118.463	124.52	161.373	665.073
CIL1546S0059	1.21	2.687	9.193	41.807	163.53	649.337
CIL1084S0081	4.377	4.003	2.743	4.277	120.333	638.593
CIL1216S0066	87.977	121.547	151.957	244.263	301.923	628.983
CIL0902S0163	198.227	173.67	231.707	321.813	387.74	626.637
CIL0438S0001	7.497	8.15	13.163	95.15	206.183	626.053
CIL1021S0111	96.96	134.913	547.247	433.817	319.793	622.53
CIL1068S0049	46.007	68.37	95.74	279.333	351.42	606.183
CIL1312S0001	45.65	88.407	590.88	502.707	440.137	594.19
CIL0367S0003	44.507	59.507	124.743	191.6	235.187	585.577
CIL1273S0007	7.78	11.87	98.12	254.227	294.947	581.497
CIL1047S0144	2.587	6.563	194.793	325.46	248.897	567.373
CIL0009S0040	20.64	51.767	52.697	218.887	331.347	566.667
CIL1009S0085	22.05	39.21	123.883	292.737	286.55	562.157
CIL1564S0017	23.953	59.63	73.473	167.883	277.977	557.713
CIL1118S0059	77.527	166.113	201.553	173.4	232.547	556.8
CIL1069S0001	0.59	3.94	7.57	51.857	191.03	550.83
CIL0948S0161	35.497	126.023	252.147	606.91	812.007	536.6
CIL1246S0028	9.033	11.637	89.94	78.587	138.797	528.433
CIL1051S0069	24.233	54.033	83.193	124.883	227.177	519.723
CIL0909S0224	8.183	11.09	94.67	198.933	202.897	514.157
CIL0935S0025	1.76	5.003	3.703	248.12	396.7	512.12
CIL1265S0070	17.647	20.857	30.06	99.753	151.35	510.47
CIL1358S0032	120.4	178.673	308.643	573.083	608.59	507.127
CIL0260S0005	4.803	10.01	100.69	359.19	493.72	500.913
CIL1155S0020	34.23	45.123	71.407	166.737	273.53	494.887
CIL1132S0030	16.957	53.363	3.083	1134.31	965.79	492.537
CIL0914S0049	45.477	59.467	107	202.763	305.32	492.207
CIL1149S0046	8.237	53.777	128.847	87.213	105.4	470.8
CIL1384S0023	4.5	9.173	86.797	214.533	284.593	469.487
CIL1018S0091	11.997	9.703	31.287	92.49	169.9	465.123
CIL0833S0001	4.227	6.497	26	158.927	243.25	459.61
CIL1531S0014	1540.02	1340.31	1099.67	1073.53	1101.48	457.66
CIL1417S0036	1713.21	1541.14	1846.2	852.797	596.113	457.173
CIL0978S0156	155.397	161.95	262.803	302.23	360.267	452.293
CIL0996S0033	156.803	139.89	223.2	317.61	482.083	448.023
CIL1305S0023	3353.76	3073.36	1993.61	1664.15	1598.51	447.003
CIL1037S0067	2.443	3.273	14.06	132.13	203.197	443.187
CIL0940S0082	89.907	118.767	102.997	95.367	122.303	440.027
CIL0978S0077	215.35	257.33	335.84	438.527	439.8	433.037
CIL1354S0015	76.72	79.58	162.053	149.13	198.923	432.867
CIL1358S0005	2.433	6.553	29.447	19.693	80.097	428.76
CIL1099S0055	263.083	140.127	96.877	223.397	300.533	428.083
CIL1263S0090	6518.39	1492.52	1898.22	1798.74	836.323	426.017
CIL0407S0007	9.343	25.607	42.61	153.857	338.887	425.34
CIL1158S0083	9.09	20.09	90.413	110.4	178.887	419.62
CIL1197S0061	53.947	89.15	213.877	414.143	321.48	418.563
CIL1018S0087	111.063	100.45	196.857	279.9	259.14	416.17
CIL0948S0228	20.147	9.937	7.65	31.557	148.627	415.977
CIL1163S0013	74.477	123.453	188.923	215.887	250.987	407.13
CIL0990S0017	3.357	6.547	82.657	199.85	175.193	404.803
CIL1203S0030	83.64	159.62	136.263	145.857	211.787	399.273
CIL0416S0009	148.997	171.93	383.233	437.953	431.35	398.793
CIL1018S0131	151.097	197.163	281.627	195.673	230.487	396.58
CIL0935S0010	39.077	43.883	76.73	145.073	183.453	393.877
CIL1587S0002	3.967	4.73	19.37	88.843	179.423	389.96
CIL1324S0057	1111.77	762.227	1318.87	972.34	714.11	389.38
CIL1449S0007	0.493	0.503	0.93	2.007	58.36	377.937
CIL0957S0123	8.06	6.44	19.117	104.65	170.723	377.127
CIL1361S0065	73.007	252.37	190.81	192.48	202.3	371.64
CIL1525S0029	109.87	104.927	127.173	164.703	202.39	371.25
CIL1608S0012	0.353	0.907	1.923	7.64	84.087	368.397
CIL1178S0045	33.373	45.73	85.897	252.13	306	367.86
CIL1090S0053	94.217	103.45	170.013	207.797	236.003	366.217
CIL1468S0013	6.987	8.49	41.417	73.47	141.833	363.493
CIL0053S0008	0.77	1.707	3.837	234.213	278.55	362.563
CIL1570S0023	0.773	1.2	7.29	16.873	77.807	359.88
CIL1163S0009	27.83	22.087	81.31	219.027	328.843	359.807
CIL0897S0029	7375.34	5323.31	3270.46	2023.89	1764.62	357.527
CIL1219S0064	14.003	13.287	21.723	102.967	155.98	356.907
CIL0006S0011	1.443	3.007	61.633	173.103	275.333	355
CIL1305S0038	1.08	280.103	1.973	7.243	54.91	351.86
CIL1358S0028	16.77	21.913	154.693	216.237	247.89	348.847
CIL0163S0008	31.297	37.81	67.3	112.187	129.627	348.557
CIL1204S0081	131.303	140.673	164.027	252.903	305.637	346.91
CIL1305S0050	60.86	88.477	78.6	137.31	169.097	346.86
CIL0946S0082	0.853	2.647	2.837	18.827	92.16	346.497
CIL1143S0014	0.277	0.727	0.963	2.66	40.47	343.617
CIL1534S0014	422.843	19.443	168.23	289.693	229.973	340.67
CIL0895S0150	86.267	85.327	105.937	134.263	178.02	337.033
CIL0990S0134	0.363	0.757	8.253	25.573	78.92	334.463
CIL1546S0058	0.787	2.763	10.627	23.787	106.967	332.693
CIL1031S0001	1.027	2.04	37.173	50.22	67.403	330.767
CIL1494S0031	63.167	59.967	82.787	106.797	126.16	328.037
CIL0010S0048	0.61	0.88	2.9	23.743	82.89	325
CIL1048S0014	71.133	84.297	176.71	175.283	227.887	323.887
CIL1545S0023	1252.71	1026.48	1015.02	907.22	920.987	322.7
CIL1497S0054	99.19	104.487	186.153	215.173	185.36	320.627
CIL1374S0004	69.943	65.067	101.867	168.5	187.373	317.763
CIL1246S0075	29.203	48.507	108.98	141.047	170.233	315.347
CIL0060S0001	0.373	0.863	0.743	9.887	133.153	313.203
CIL1197S0036	86.517	100.613	128.22	172.933	195.007	311.473
CIL1173S0023	23.52	37.68	38.367	118.277	164.457	311.24
CIL0914S0091	36.663	27.213	99.403	104.207	135.73	309.033
CIL1030S0146	20.087	19.48	92.867	154.65	165.567	308.64
CIL0385S0017	4.79	10.36	32.087	65.093	130.003	308.14
CIL1305S0033	2.21	2.837	5.013	30.153	93.913	306.87
CIL1229S0070	21.55	76.233	78.793	160.45	178.77	302.733
CIL1090S0014	122.427	122.85	148.12	253.26	250.273	301.957
CIL1057S0089	7.383	10.54	39.45	129.37	210.523	301.887
CIL1048S0062	2802.51	2802.11	2370.84	1178.45	1052.54	301.483
CIL0978S0032	29.697	30.82	102.187	165.41	179.257	297.05
CIL0972S0009	105.187	124.9	65.697	64.537	98.5	296.973
CIL1025S0113	115.72	144.12	194.393	158.793	161.393	296.867
CIL0984S0056	0.863	1.77	20.007	87.657	127.037	296.8
CIL1431S0026	1.143	3.13	1.91	25.827	82.113	294.053
CIL0117S0006	99.64	101.88	118.62	154.733	192.973	293.243
CIL0902S0169	122.15	114.473	138.373	170.4	204.03	290.447
CIL0987S0038	113.947	92.31	118.793	188.127	213.257	288.75
CIL1154S0063	26.443	29.767	36.38	88.027	117.9	288.703
CIL1516S0016	52.873	62.957	138.563	171.86	247.187	284.763
CIL1265S0018	1.213	2.133	57.38	145.737	214.403	284.267
CIL1106S0004	108.263	143.787	316.91	308.993	282.657	283.013
CIL1057S0032	26.823	47.52	56.78	219.513	235.093	279.927
CIL0967S0106	52.817	71.437	82.073	157.267	168.427	279.65
CIL0937S0165	2.587	5.253	15.637	69.57	101.973	279.55
CIL0895S0054	100.653	103.393	98.773	161.293	225.297	279.293
CIL0922S0042	1.477	2.51	6.333	28.507	68.14	279.06
CIL1406S0036	49.837	62.023	97.54	153.077	190.613	277.963
CIL1169S0016	1165.32	846.293	1484.88	784.427	630.083	276.91
CIL1547S0020	32.873	35.84	79.11	141.593	136.06	273.07
CIL0970S0132	35.943	38.207	74.427	105.63	149.92	271.917
CIL1348S0047	57.633	57.973	101.92	269.403	324.513	270.287
CIL1385S0005	75.017	77.373	92.1	111.313	154.083	270.093
CIL1180S0031	11.097	13.087	141.923	236.017	157.443	269.91
CIL1096S0020	4.857	10.677	31.333	103.757	150.717	269.573
CIL0599S0004	28.37	33.663	167.757	175.277	193.983	268.557
CIL0935S0135	21.587	20.01	34.23	168.023	161.57	268.28
CIL1128S0058	27.62	34.81	82.513	98.567	135.047	267.953
CIL0475S0002	29.44	43.293	71.19	228.687	232.883	267.297
CIL1520S0014	30.15	36.26	45.897	56	84.873	265.957
CIL1594S0019	102.237	110.22	164.05	190.313	217.143	265.59
CIL1399S0001	55.773	134.807	95.143	452.357	282.397	264.503
CIL1401S0024	46.237	46.05	47.94	53.517	81.643	264.393
CIL0899S0128	12.57	38.597	42.13	204.407	185.58	263.957
CIL0207S0011	28.227	35.65	135.913	191.95	179.407	263.473
CIL1434S0040	12.52	19.22	67.037	184.06	208.953	262.933
CIL1114S0043	22.177	35.933	97.843	165.313	178.993	262.86
CIL0948S0122	114.167	114.253	150.227	200.42	214.257	262.267
CIL1515S0049	130.817	152.53	171.28	201.44	211.45	261.943
CIL1351S0018	3608.47	2882.91	1944.19	1276.56	1031.32	259.463
CIL0970S0117	9.733	35.69	20.34	42.087	73.327	259.24
CIL0967S0017	5.527	11.673	10.707	76.353	145.363	259.007
CIL1090S0076	103.82	103.843	103.213	111.09	128.477	256.333
CIL1216S0098	6.727	8.367	41.063	75.87	122.34	255.097
CIL1557S0015	56.247	50.397	87.883	100.113	121.75	254.667
CIL1194S0049	69.33	38.07	83.003	168.017	171.583	253.577
CIL1156S0035	533.23	520.703	553.19	603.143	594.167	247.22
CIL1090S0041	36.313	38.423	66.347	126.077	146.27	246.82
CIL1196S0046	67.543	31.727	58.15	143.41	257.037	245.603
CIL1057S0030	24.413	39.017	62.02	194.627	209.83	241.97
CIL1057S0041	22.053	40.623	92.987	156.21	219.413	240.533
CIL1386S0004	35.937	36.04	66.233	109.163	135.047	239.327
CIL0917S0112	1.35	1.763	3.833	17.737	51.78	238.27
CIL0914S0042	113.31	138.52	134.943	212.13	223.867	238.097
CIL0893S0152	5.087	6.22	14.113	17.447	66.68	237.74
CIL0450S0012	7.447	9.54	46.373	97.973	134.883	237.487
CIL0978S0048	3938.7	3752.05	2385.8	1782.39	1776.62	236.32
CIL0909S0069	37.747	38.873	76.697	117.363	136.343	234.737
CIL1371S0101	5.393	7.743	50.51	81.477	81.507	234.607
CIL1282S0011	0.323	0.56	0.87	5.063	55.347	234.253
CIL1141S0041	0.35	0.617	7.847	19.69	102.46	233.523
CIL0957S0026	87.583	170.743	216.607	282.697	235.02	233.517
CIL1025S0070	53.933	136.843	95.737	100.857	134.093	233.2
CIL0008S0019	9.583	7.997	64.313	77.39	119.08	232.777
CIL1145S0103	9.583	7.997	64.313	77.39	119.08	232.777
CIL0454S0004	51.84	67.893	104.84	126.057	168.147	232.277
CIL1494S0051	1.62	3.257	30.503	110.267	138.473	231.55
CIL0041S0015	0.467	2.367	15.563	142.767	179.517	230.543
CIL0866S0002	4.263	29.72	86.617	50.497	55.09	230.31
CIL0923S0029	8.433	13.237	25.037	44.843	87.893	230.19
CIL0041S0013	0.217	0.737	0.923	23.27	84.457	230.047
CIL1467S0036	82.377	96.667	290.693	307.83	283.18	229.987
CIL0984S0083	69.057	82.31	205.937	173.183	195.137	229.633
CIL1512S0036	79.033	61.2	83.283	119.537	160.473	229.13
CIL0218S0028	9.913	37.23	43.213	73.503	110.297	226.597
CIL0155S0005	45.523	59.63	163.753	238.393	260.363	226
CIL1330S0002	49.11	76.997	77.2	100.167	147.4	225.883
CIL0008S0013	1.51	1.863	12.47	69.293	177.853	225.553
CIL0912S0050	14.537	18.68	69.837	81.097	131.433	225.02
CIL0970S0013	40.393	30.727	39.843	49.017	86.123	224.767
CIL1343S0026	8.59	7.04	37.917	83.39	119.867	224.723
CIL1020S0127	10.077	25.503	19.007	75.743	131.04	224.177
CIL0411S0006	119.77	119.737	270.443	347.807	307.21	223.483
CIL0978S0044	87.163	81.827	113.73	109.263	112.65	223.297
CIL0962S0027	0.86	0.937	3.61	9.16	41.603	223.293
CIL1060S0085	59.873	87.227	87.193	92.687	120.957	223.287
CIL1315S0003	43.37	51.93	54.26	82.427	115.65	222.95
CIL1577S0040	58.47	135.783	87.133	103.823	126.683	222.023
CIL1051S0057	30.037	42.81	93.203	154.147	150.59	221.81
CIL0990S0115	0.59	2.187	4.253	18.323	63.637	220.073
CIL0310S0018	22.5	55.943	133.79	75.03	139.6	219.36
CIL1122S0062	0.43	1.027	2.79	16.193	68.91	217.91
CIL1501S0001	84.38	85.26	119.407	132.26	158.453	217.457
CIL1277S0017	99.02	122.93	172.2	153.443	153.633	216.74
CIL1020S0081	33.28	88.71	57.897	314.03	188.153	216.593
CIL0919S0011	99.287	92.64	123.007	166.557	197.823	216.52
CIL1403S0022	8.627	11.693	88.49	97.853	139.123	216.433
CIL0010S0035	83.893	91.487	146.17	166.313	168.357	216.15
CIL1144S0076	6.46	7.66	39.717	60.92	85.54	215.75
CIL0951S0076	21.507	21.61	29.873	45.227	73.153	214.66
CIL0148S0002	0.42	1.137	3.633	15.33	50.49	214.453
CIL1417S0112	35.71	36.517	31.567	51.39	67.737	214.03
CIL0922S0108	24.243	54.777	95	92.073	134.513	212.73
CIL1239S0024	28.137	37.157	122.833	120.977	102.983	212.523
CIL1446S0042	9.973	18.55	91.923	220.88	310.323	212.113
CIL1227S0029	29.667	50.183	80.847	109.837	128.87	211.85
CIL1197S0042	0.69	1.23	3.4	27.837	50.043	211.687
CIL0001S0013	29.83	42.607	106.84	184.46	177.887	211.647
CIL1047S0062	92.017	100.877	140.413	163.46	185.997	210.957
CIL1370S0022	2.177	1.823	13.63	24.187	59.193	209.583
CIL1456S0060	0.953	0.897	6.42	16.637	57.783	209.393
CIL0893S0177	10.327	11.54	41.01	75.747	96.773	209.37
CIL0320S0016	102.74	45.267	104.417	183.843	300.307	208.833
CIL0893S0067	35.95	34.927	65.883	87.77	117.993	208.717
CIL0893S0053	72.587	105.483	93.457	114.36	133.81	208.14
CIL1207S0044	53.157	50.527	87.923	130.913	129.723	208.067
CIL1575S0025	0.403	0.94	0.983	3.637	35.19	207.033
CIL1076S0035	55.867	72.743	103.587	136.357	153.937	206.117
CIL1084S0073	10.7	16.277	31.78	61.087	99.877	206.05
CIL1173S0082	47.753	58.26	67.977	97.153	118.99	205.87
CIL0908S0103	67.05	66.457	151.863	109.593	98.293	204.273
CIL1596S0024	8.66	6.253	47.217	90.71	169.973	203.71
CIL0895S0209	33.287	50.023	52.12	81.493	108.543	202.587
CIL1157S0057	5.68	5.377	38.067	80.277	107.453	201.907
CIL0935S0027	11.547	17.547	28.167	146.607	278.627	201.82
CIL0906S0026	674.88	549.753	420.227	361.583	355.05	201.223
CIL0984S0090	40.203	45.5	93.333	95.493	127.517	201.173
CIL1167S0055	25.58	28.44	44.867	92.427	143.193	200.573
CIL1429S0039	26.117	53.62	88.05	153.067	155.727	200.017
CIL1481S0027	1.24	2.463	3.62	22.02	43.19	199.943
CIL0897S0016	0.407	0.593	0.823	5.357	94.66	199.78
CIL1236S0021	16.007	22.043	127.307	134.657	137.493	199.23
CIL1336S0001	77.563	86.897	98.38	143.82	154.04	199.147
CIL0923S0154	15.373	134.907	326.367	639.907	699.15	198.403
CIL0938S0053	12.91	17.337	23.843	85.733	121.947	198.277
CIL0560S0001	93.623	69.28	249.477	347.953	311.4	196.07
CIL1057S0044	35.22	40.34	33.01	44.667	68.873	195.783
CIL1282S0045	5.263	3.33	23.447	44.697	74.473	195.683
CIL1486S0033	41.797	43.163	68.527	89.23	112.64	195.367
CIL0500S0001	5.183	5.29	48.59	51.773	45.053	194.65
CIL1126S0072	5.753	5.847	12.92	70.817	103.953	194.367
CIL0311S0013	30.167	45.103	64.97	68.06	87.847	194.297
CIL1076S0056	53.137	78.707	83.257	161.913	148.463	193.893
CIL1336S0021	79.94	82.23	123.607	157.903	174.97	193.373
CIL1204S0021	72.85	82.523	119.273	124.737	126.14	193.277
CIL1577S0014	60.31	67.077	108.627	123.623	141.047	192.707
CIL0967S0096	132.26	131.477	323.62	452.017	383.283	190.067
CIL1135S0049	6.433	6.23	51.627	56.937	71.343	189.61
CIL0925S0071	12.69	30.797	150.117	101.733	83.937	188.277
CIL1229S0017	229.893	151.79	88.457	163.58	164.433	187.973
CIL1158S0043	14.903	19.037	94.163	169.853	244.13	187.643
CIL1101S0105	36.217	40.347	65.363	139.48	157.17	187.64
CIL0002S0043	45.52	44.74	89.103	123.707	143.383	185.77
CIL0921S0076	20.463	21.703	34.773	81.343	79.123	185.177
CIL1068S0098	13.723	14.563	25.113	30.213	54.817	185.017
CIL0212S0013	40.333	29.667	48.42	96.877	119.57	184.85
CIL1118S0009	20.527	20.653	67.52	164.127	212.817	184.58
CIL1151S0022	43.087	48.143	62.007	108.963	114.857	182.727
CIL1166S0003	851.113	412.967	332.13	356.983	319.463	182.487
CIL0962S0118	9.143	9.367	33.67	118.657	150.003	182.14
CIL0293S0012	55.95	55.15	75.08	83.533	86.607	182.033
CIL1048S0016	3191	3140.38	1333.09	886.1	679.3	181.25
CIL0266S0007	1.783	2.477	7.707	29.857	59.05	180.923
CIL1420S0021	3.083	4.907	42.33	73.307	126.103	180.257
CIL1134S0025	15.78	25.357	66.147	74.223	70.8	179.007
CIL1175S0035	106.87	97.433	176.85	222.463	220.773	177.89
CIL0922S0193	0.39	0.69	8.6	34.957	52.76	177.843
CIL1336S0004	90.5	156.02	143.833	191.463	198.3	177.627
CIL1030S0142	48.05	62.14	67.27	104.923	120.153	176.84
CIL0149S0014	3.037	5.24	15.08	22.973	53.78	176.51
CIL0921S0052	45.94	52.893	74.253	80.34	93.967	175.79
CIL1057S0065	54.353	69.387	91.83	113.12	139.223	174.51
CIL0996S0063	59.817	55.903	85.657	137.683	143.087	174.023
CIL0091S0001	4.367	7.577	16.91	57.84	130.523	172.893
CIL1476S0037	11.72	15.08	35.853	56.52	98.437	172.477
CIL1508S0018	22.94	21.443	72.927	78.927	100.98	172.18
CIL0897S0028	5068.76	3297.93	1899.14	1416.39	1175.61	171.757
CIL1459S0024	1.67	5.453	14.71	29.667	80.24	170.507
CIL0929S0094	42.72	55.57	85.797	65.243	104.663	168.96
CIL1454S0040	12.523	26.84	32.89	154.28	150.34	168.897
CIL1060S0019	19.193	23.127	52.06	55.663	63.483	168.793
CIL0068S0008	30.103	39.197	63.647	54.047	67.79	168.697
CIL0940S0187	63.867	61.677	65.177	129.267	165.82	168.38
CIL1107S0014	61.92	44.16	111.343	132.72	112.033	168.127
CIL0948S0199	44.32	55.143	47.05	79.887	90.81	167.407
CIL1066S0056	30.713	48.817	75.323	83.713	79.117	166.91
CIL0919S0181	61.723	62.87	113.573	114.59	134.817	166.437
CIL1056S0003	10.107	11.48	27.743	38.8	53.983	166.33
CIL0990S0166	19.017	24.643	91.393	85.963	77.037	166.107
CIL0136S0005	0.68	0.777	0.82	2.177	29.617	164.967
CIL0452S0002	3.887	11.813	59.593	59.807	72.437	164.25
CIL1192S0062	49.903	56.063	217.73	160.56	118.467	163.537
CIL0967S0161	10.243	9.36	9.34	67.9	164.7	163.433
CIL0922S0151	43.21	44.18	55.707	90.913	96.677	162.723
CIL0158S0002	13.483	15.173	76.003	119.573	74.36	162.507
CIL1242S0015	71.39	91.103	125.767	151.027	138.25	162.277
CIL1294S0021	49.213	53.98	110.123	111.393	123.5	162.113
CIL1505S0017	18.633	35.147	22.937	25.33	43.223	161.92
CIL1265S0061	0.94	2.44	29.603	156.09	181.507	161.823
CIL1319S0024	51.333	51.64	89.957	96.253	101.29	161.677
CIL1133S0042	1.49	2.347	33.993	36.943	57.243	161.283
CIL0925S0029	14.567	14.647	20.413	63.587	104.257	161.107
CIL1342S0046	50.08	12.47	31.577	82.66	134.56	160.443
CIL1119S0043	112.353	226.82	277.837	179.79	153.74	160.42
CIL1229S0064	27.343	49.247	55.403	55.877	71.713	159.93
CIL1541S0024	29.84	44.333	46.627	56.85	84.007	159.91
CIL1132S0008	14.647	20.537	237.483	238.453	183.29	159.387
CIL1226S0014	19.493	18.123	34.677	35.493	62.5	158.27
CIL1002S0048	1.607	2.273	5.573	12.577	45.97	157.987
CIL0893S0345	0.263	0.507	1.213	7.06	36.497	157.833
CIL0134S0009	53.143	64.763	137.587	127.503	96.08	157.747
CIL0948S0056	57.453	62.437	75.13	101.407	107.193	157.623
CIL1515S0031	0.347	0.693	5.497	42.543	56.213	157.113
CIL1151S0021	36.417	40.887	49.217	88.653	98.443	156.447
CIL0979S0143	1538.12	1262.73	1008.92	763.52	724.71	156.277
CIL1078S0105	23.25	26.457	57.637	73.343	94.06	156.047
CIL1598S0024	70.84	98.107	84.197	108.897	139.337	155.843
CIL1259S0038	0.83	2.08	6.263	38.943	49.367	155.1
CIL0940S0059	11.57	26.337	39.69	38.413	51.897	155.043
CIL0176S0046	47.07	57.77	61.71	79.78	95.193	154.71
CIL0897S0072	36.16	41.127	63.38	76.74	94.237	154.323
CIL1549S0032	16.353	119.963	65.71	485.51	240.913	154.067
CIL1138S0087	44.797	51.9	86.377	95.85	94.75	153.62
CIL1087S0082	24.713	24.13	39.223	48.067	69.18	153.557
CIL1399S0004	34.98	38.73	65.373	77.767	96.907	153.54
CIL1189S0025	1628.92	1025.08	990.727	900.13	828.81	153.523
CIL1137S0056	73.927	77.677	122.467	173.903	151.78	152.953
CIL1178S0009	42.223	40.54	74.04	81.057	99.147	152.46
CIL1484S0012	4.463	3	3.03	46.77	53.103	152.213
CIL1295S0055	18.257	11.257	72.03	49.047	74.743	152.113
CIL1126S0075	2.05	1.533	7.907	57.1	84.573	151.013
CIL1378S0002	49.693	39.46	55.75	69.61	71.847	150.333
CIL1268S0041	38.01	41.367	105.767	113.963	122.613	150.27
CIL1197S0003	8.86	9.373	21.083	57.74	76.14	149.803
CIL1383S0006	26.223	56.54	86.167	81.617	97.787	149.41
CIL0990S0040	15.947	19.52	28.46	54.837	62.06	149.26
CIL1020S0043	13.167	13.283	44.73	93.127	82.197	149.23
CIL0009S0027	33.32	29.6	63.21	78.423	67.633	149.09
CIL0064S0023	45.263	57.787	94.773	93.74	103.727	149.05
CIL1187S0036	50.683	54.573	61.603	78.887	85.99	149.023
CIL1456S0056	26.653	27	52.087	76.663	88.847	148.91
CIL1015S0003	12.72	17.607	33.153	38.14	54.393	148.84
CIL1348S0026	51.89	27.65	42.56	72.487	86.373	148.66
CIL1006S0096	55.813	46.977	49.687	74.787	94.587	147.947
CIL0465S0012	28.65	23.65	89.397	110.383	102.02	147.783
CIL1038S0027	38.23	45.8	88.24	146.22	177.163	147.67
CIL1146S0002	1967.95	1488.27	1132.86	872.133	776.207	147.523
CIL1153S0015	61.897	65.15	46.437	52.137	73.787	147.367
CIL1468S0019	26.647	59.173	148.773	129.55	173.3	146.927
CIL1064S0105	47.473	67.07	74.453	96.01	111.443	146.693
CIL1029S0042	31.593	39.91	61.193	63.213	81.463	146.567
CIL1343S0034	0.47	1.93	12.573	27.12	53.533	146.543
CIL1133S0003	27.363	29.88	45.113	70.817	89.893	146.427
CIL1021S0083	114.447	109.18	237.183	242.06	151.153	146.193
CIL0893S0180	5.617	6.927	23.69	36.937	52.347	146.143
CIL1447S0020	20.783	27.007	30.983	62.93	80.483	146.023
CIL0860S0002	64.503	166.18	299.503	229.503	136.427	145.81
CIL0893S0186	13.8	19.347	80.203	78.337	92.173	145.537
CIL0566S0001	71.77	74.03	119.323	137.613	122.917	145.487
CIL1456S0019	1.123	2.47	10.123	20.337	48.07	144.977
CIL1030S0096	46.583	49.307	56.383	103.557	101.243	144.69
CIL1348S0035	58.677	80.213	85.09	125.12	139.157	144.547
CIL1607S0017	41.693	43.757	147.437	117.487	101.883	144.457
CIL1216S0018	69.013	42.263	51.797	62.557	124.867	144.35
CIL1090S0082	346.48	316.3	353.73	312.477	294.58	143.98
CIL1057S0092	12.93	14.353	47.107	64.293	91.243	143.49
CIL0908S0013	42.587	53.783	97.397	98.987	104.133	143.333
CIL1025S0018	53.763	71.56	86.253	101.47	112.293	143.327
CIL1147S0098	19.103	31.317	56.177	77.56	102.223	142.973
CIL1221S0029	22.39	79.057	92.537	202.643	210.673	142.88
CIL0002S0004	43.537	49.213	69.263	72.747	86.893	140.997
CIL1268S0017	28.907	31.123	29.25	47.56	50.203	140.463
CIL1386S0022	38.73	55.517	89.953	93.653	117.14	139.9
CIL1166S0014	18.97	24.103	84.607	76.933	83.17	139.28
CIL1006S0045	40.783	43.993	71.663	81.843	90.22	139.19
CIL1277S0064	2.227	3.737	16.62	47.373	63.773	139.073
CIL1171S0034	51.16	74.313	134.907	152.71	172.807	139.05
CIL0070S0007	2454.64	1753.2	1211.4	891.337	775.22	137.873
CIL0976S0038	1.39	4.6	38.717	101.37	135.39	137.733
CIL0979S0077	28.62	35.003	185.957	163.48	128.207	137.56
CIL1104S0042	1.723	3.663	10.963	57.543	83.323	136.75
CIL1259S0077	6.467	6.52	16.683	29.093	43.25	136.697
CIL1061S0088	1723.39	1516.26	943.877	627.747	548.057	136.487
CIL0149S0012	6	7.183	46.88	44.427	60.2	136.36
CIL1210S0024	27.163	42.483	24.82	44.87	55.963	136.34
CIL0895S0227	0.16	0.427	1.153	2.547	27.45	136.047
CIL1607S0024	0.433	1.24	14.21	112.543	139.437	135.057
CIL1192S0020	40.8	45.46	66.703	105.39	124.803	134.837
CIL1447S0006	3.29	4.19	14.463	18.06	45.74	134.817
CIL1127S0040	19.497	22.703	70	85.62	103.277	134.543
CIL0912S0031	3.733	6.81	18.337	59.76	78.133	134.49
CIL1003S0146	24.59	23.82	73.883	64.847	79.07	133.987
CIL1030S0116	4.193	6.527	39.493	52.937	77.413	133.743
CIL1359S0031	1101.78	914.633	724.59	607.86	527.027	133.577
CIL1075S0063	19.67	19.823	38.33	45.113	53.02	133.203
CIL1434S0044	520.76	334.55	214.073	248.93	197.313	132.897
CIL0912S0055	53.3	42.967	70.473	80.46	69.027	132.857
CIL1192S0058	1018.61	778.443	757.763	647.383	602.673	132.623
CIL1524S0004	38.6	49.113	75.317	97.61	128.193	132.533
CIL1429S0021	38.663	54.11	66.363	55.257	68.817	132.25
CIL0374S0002	70.217	103.34	159.01	158.723	178.153	131.927
CIL1132S0068	4.95	9.273	51.11	79.963	83.997	131.837
CIL1325S0059	16.49	20.593	46.51	63.213	70.91	131.807
CIL1499S0043	2.967	5	30.743	123.877	160.2	131.557
CIL1015S0061	14.703	13.033	21.387	35.603	55.44	131.29
CIL1078S0097	365.397	355.02	240.913	224.437	229.757	130.897
CIL0970S0098	0.413	1.887	10.243	31.987	55.953	130.593
CIL1201S0016	47.013	36.38	83.883	96.21	76.103	129.89
CIL0101S0009	840.437	820.537	1071.38	713.44	215.533	129.887
CIL1175S0069	11.353	13.51	29.8	45.187	61.133	129.69
CIL1543S0012	12.427	10.55	21.647	31.13	47.68	129.677
CIL1569S0016	4.63	11.84	15.72	16.257	46.017	129.443
CIL0331S0001	46.77	47.677	65.177	83.73	84.883	129.337
CIL1361S0003	2.537	4.47	20.163	42.903	64.077	129.303
CIL1324S0020	32.253	27.263	33.68	39.763	50.913	129.1
CIL0324S0014	0.303	0.32	1.413	6.537	15.137	129.083
CIL1215S0058	43.8	55.503	100.43	95.87	90.49	129.037
CIL1230S0089	37.24	36.543	52.737	66.02	71.9	128.787
CIL1078S0102	0.18	0.303	0.213	0.893	35.917	128.567
CIL0420S0007	0.287	0.69	1.167	28.563	34.24	128.303
CIL1076S0055	35.657	53.763	52.33	108.363	99.793	128.023
CIL0359S0027	39.243	48.297	120.68	107.887	96.957	127.977
CIL0942S0234	60.023	67.397	84.913	93.113	90.137	127.853
CIL0215S0012	47.407	39.92	47.743	86.46	112.713	127.317
CIL1102S0066	4.077	5.853	75.94	169.527	205.22	127.087
CIL1207S0012	32.75	40.507	55.787	123.98	115.513	126.237
CIL1190S0053	1.073	2.437	8.207	13.063	31.747	125.687
CIL1110S0053	51.227	52.007	137.53	103.973	116.643	125.57
CIL1084S0022	41.877	35.947	95.783	81.627	65.243	125.37
CIL0267S0014	4.143	5.063	5.897	8.247	22.25	125.36
CIL0925S0100	25.527	22.933	45.163	80.313	91.063	125.18
CIL0146S0011	34.557	56.89	57.523	52.217	62.66	125.11
CIL0967S0061	51.697	53.767	74.53	96.957	111.537	125.017
CIL1463S0024	29.877	79.07	109.71	148.66	128.663	124.963
CIL1619S0010	14.81	27.307	112.587	77.937	71.827	124.74
CIL1066S0079	47.127	55.263	72.32	93.203	104.923	124.677
CIL1003S0034	35.017	36.733	45.6	60.88	69.523	124.32
CIL1282S0019	3.2	2.993	15.94	41.15	66.37	124.117
CIL0004S0018	8.35	13.13	48.387	56.423	76	123.94
CIL0001S0034	65.2	38.65	22.02	77.807	107.043	123.667
CIL0006S0003	0.303	0.773	27.22	107.737	100.247	123.657
CIL1608S0011	0.29	0.95	2.78	8.477	69.397	123.587
CIL1126S0110	60.013	66.997	78.777	96.017	105.003	123.183
CIL1552S0039	2.92	3.633	23.827	67.193	72.733	123.03
CIL1102S0067	20.7	26.557	172.493	234.12	314.783	122.953
CIL1449S0020	41.433	55.143	74.423	69.517	71	122.94
CIL0358S0015	52.187	50.083	60.48	71.157	83.93	122.857
CIL1277S0007	21.733	23.327	48.113	72.3	87.827	122.54
CIL0909S0093	50.917	71.33	73.507	156.053	113.383	122.47
CIL1157S0068	12.883	13.303	37.407	31.593	36.377	122.093
CIL0953S0036	54.81	49.103	86.353	113.117	115.563	121.023
CIL0259S0019	37.06	34.107	54.343	55.73	68.467	121.017
CIL1351S0007	37.407	47.853	71.003	109.033	110.033	120.867
CIL0989S0043	12.213	12.037	21.76	29.79	50.573	120.737
CIL1180S0024	13.87	15.77	16.74	24.053	43.65	120.553
CIL1277S0018	8.59	9.2	16.923	31.093	47.557	120.51
CIL1300S0057	51.39	62.503	83.09	92.55	102.493	120.433
CIL0935S0079	30.993	44.743	54.063	63.86	91.267	120.257
CIL1294S0016	0.147	0.757	1.8	28.903	51.457	120.113
CIL1047S0142	6.74	8.69	19.003	78.293	101.447	120.033
CIL0987S0157	23.533	30.827	34.693	61.86	74.16	119.997
CIL0893S0269	18.717	27.74	42.877	70.507	85.863	119.97
CIL0010S0017	2.977	2.847	6.68	17.11	38.82	119.333
CIL1332S0049	13.193	16.353	27.417	33.267	44.33	119.243
CIL1084S0095	33.317	18.33	39.753	46.077	60.567	119.127
CIL0942S0164	37.333	38.78	51.713	56.49	54.667	119.003
CIL0948S0224	27.22	27.983	25.127	38.683	50.02	118.93
CIL0990S0018	0.243	0.527	9.067	51.8	65.103	118.857
CIL0132S0008	37.603	40.82	55.257	61.11	74.14	118.757
CIL1503S0033	25.583	40.287	73.06	60.417	69.567	118.667
CIL1147S0066	0.45	1.257	7.943	10.47	36.283	118.617
CIL1032S0138	4.357	4.903	29.953	60.067	75.7	118.39
CIL1541S0018	27.433	31.22	45.083	51.213	54.4	118.367
CIL1293S0050	91.997	66.997	119.597	184.65	166.513	118.247
CIL1295S0016	33.053	36.62	100.853	101.383	98.83	117.76
CIL0091S0006	18.033	21.933	35.38	60.42	69.613	117.53
CIL1500S0053	53.707	50.753	60.967	101.25	120.46	117.207
CIL1369S0022	51.463	37.17	77.083	88.107	81.013	116.993
CIL0923S0067	0.16	0.53	0.593	1.667	19.823	116.927
CIL0984S0120	67.127	86.257	108.86	142.977	135.65	116.917
CIL1076S0028	32.753	41.487	47.557	87.23	110.623	116.72
CIL0925S0054	7.143	7.503	23.277	34.507	54.727	116.627
CIL0116S0001	1.33	3.39	11.177	34.223	64.313	116.347
CIL0979S0120	1.567	3.297	21.7	17.533	16.553	116.317
CIL0919S0140	1.927	1.35	2.187	13.72	38.077	116.263
CIL1551S0002	6.743	9.31	34.333	44.833	72.89	116.037
CIL0984S0085	15.75	18.467	28.867	47.523	65.137	115.82
CIL1204S0022	59.567	48.563	73.573	118.673	158.607	115.63
CIL0989S0050	0.187	0.2	0.867	3.627	18.28	115.463
CIL1333S0030	19.73	36.743	57.61	42.66	52.703	115.443
CIL1219S0078	13.073	18	45.647	71.283	71.217	114.97
CIL0908S0172	9.987	11.733	19.5	27.157	35.19	114.96
CIL0990S0139	13.927	13.653	34.65	35.743	37.83	114.9
CIL0919S0058	0.83	0.773	2.333	21.91	24.353	114.82
CIL1169S0007	1.087	0.7	8.877	24.987	44.173	114.54
CIL1040S0017	92.12	103.327	184.78	156.24	160.22	114.477
CIL1197S0085	49.25	58.097	94.907	87.773	87.433	114.443
CIL1031S0150	28.95	41.467	68.253	90.717	96.907	114.087
CIL1559S0005	28.323	30.703	44.403	57.647	68.65	114.057
CIL1219S0030	4.137	4.93	19.147	23.137	54.103	114.043
CIL1320S0041	4.147	5.523	44.607	142.83	154.067	113.683
CIL0909S0161	2.55	2.18	37.953	56.667	83.86	113.37
CIL0922S0141	7.093	8.173	9.66	15.147	30.527	113.37
CIL1486S0030	54.693	48.993	72.293	136.127	136.113	113.08
CIL0616S0001	8.353	52.86	113.813	83.787	108.16	113.053
CIL0957S0069	13.397	28.363	31.633	103.637	83.22	112.717
CIL0094S0012	80.133	66.397	191.683	109.233	94.113	112.48
CIL0128S0016	107.28	86.92	244.4	153.193	138.37	112.34
CIL1122S0091	1.82	2.157	5.47	16.65	33.59	112.143
CIL1242S0076	19.66	14.25	54.503	56.333	59.703	111.897
CIL1500S0028	224.16	129.9	92.857	106.783	117.42	111.827
CIL1197S0007	255.213	258.063	200.22	166.767	159.593	111.577
CIL1459S0032	1.807	8.31	9.827	49.073	74.103	111.537
CIL1047S0130	27.263	36.867	62.223	62.847	59.177	111.493
CIL1078S0017	2.567	4.22	10.903	11.24	18.463	110.787
CIL1078S0022	42.69	38.743	83.023	55.58	60.99	110.693
CIL1096S0026	45.207	43.063	57.253	62.26	70.5	110.57
CIL1003S0149	21.357	22.337	40.483	61.807	54.047	110.34
CIL1102S0098	14.647	31.797	19.79	26.227	33.28	110.32
CIL1148S0031	34.8	51.01	113.313	101.257	96.337	110.23
CIL0917S0063	220.383	197.5	202.11	262.853	218.57	110.117
CIL1549S0034	30.943	40.813	51.433	52.767	56.757	110.103
CIL0948S0156	18.23	18.323	38.087	55.59	62.28	110.087
CIL0979S0178	527.897	477.633	330.727	245.54	225.61	110.077
CIL0979S0025	20.317	36.797	59.893	60.567	58.74	109.51
CIL1231S0001	15.85	21.067	44.63	87.88	82.193	109.173
CIL1187S0084	56.853	76.19	234.9	159.347	84.02	109.117
CIL1413S0002	13.26	11.127	23.737	19.243	33.133	108.743
CIL1198S0021	52.043	43.623	46.057	39.727	56.503	108.74
CIL0935S0047	21.177	22.623	54.963	62.153	75.11	108.717
CIL1568S0034	34.92	51.467	76.81	64.193	63.677	108.323
CIL1216S0022	6.48	7.983	11.89	34.22	59.957	108.27
CIL1020S0102	582.6	781.073	572.09	472.793	312.493	108.23
CIL1579S0014	28.313	40.94	89.333	136.7	150.8	108.22
CIL1015S0126	240.39	215.587	206.723	225.013	201.22	108.21
CIL1061S0063	8.52	13.56	33.927	48.093	50.45	108.03
CIL0990S0086	28.38	28.673	35.747	40.463	51.493	107.91
CIL1023S0020	35.707	37.777	56.687	87.893	96.897	107.753
CIL0895S0048	43.29	45.82	63.467	71.48	79.913	107.41
CIL1524S0012	14.887	21.223	37.347	63.673	88.717	107.373
CIL1323S0045	1.25	4.75	35.963	256.153	261	107.213
CIL1366S0011	43	43.263	63.587	68.917	73.78	107
CIL0942S0014	52.487	57.237	80.663	102.84	112.893	106.907
CIL1237S0015	37.7	34.497	55.747	67.097	75.477	106.307
CIL0972S0007	20.403	26.81	27.25	25.207	44.283	106.143
CIL1175S0077	51.29	48.547	66.553	71.347	85.807	106.077
CIL1037S0097	14.753	16.7	30.387	36.64	47.863	106.04
CIL1147S0075	6.247	11.02	33.003	41.1	44.44	105.903
CIL0203S0007	131.367	91.657	156.71	454.257	246.923	105.883
CIL0957S0066	46.487	45.39	84.473	127.603	154.083	105.693
CIL1142S0011	42.877	48.03	71.08	72.26	75.66	105.68
CIL0129S0009	49.22	47.29	34.363	62.647	73.617	105.577
CIL1096S0009	25.973	27.173	20.457	39.313	57.993	105.547
CIL0293S0015	9.397	5.123	14.39	37.56	56.08	105.37
CIL0312S0014	27.88	30.187	103.66	96.003	103.763	104.863
CIL1001S0044	37.697	40.17	42.613	50.797	55.2	104.817
CIL1578S0011	16.17	21.393	25.817	31.523	45.417	104.39
CIL1018S0118	6.897	8.833	11.23	19.74	34.803	104.23
CIL0923S0014	36.567	40.417	70.3	89.843	93.737	104.19
CIL1090S0072	51.247	53.057	70.617	79.94	92.793	104.117
CIL1038S0036	14.827	13.44	175.22	142.727	81.253	104.113
CIL1020S0029	995.503	966.473	599.783	484.987	441.033	104.097
CIL1298S0050	47.073	56.683	59.833	88.07	105.627	104.063
CIL1037S0049	30.93	39.933	73.763	82.433	80.01	104.037
CIL1607S0013	51.927	50.643	60.31	74.953	76.373	103.86
CIL1216S0001	23.17	28.88	62.99	73.193	84.537	103.85
CIL0990S0059	51.853	60.96	78.077	100.923	105.84	103.737
CIL1152S0041	2.747	3.82	15.857	13.79	26.533	103.647
CIL1096S0015	359.54	296.407	209.793	206.45	196.943	103.633
CIL1429S0044	48.987	55.167	91.987	82.74	73.733	103.613
CIL0271S0010	24.36	27.33	99.467	114.057	135.057	103.597
CIL1484S0018	23.11	27.05	72.663	61.13	59.303	103.517
CIL0359S0018	28.02	26.8	33.987	45.607	55.83	103.17
CIL0993S0093	10.157	10.157	11.96	34.777	55.723	103.007
CIL1176S0063	1.79	6.353	15.653	37.073	71.44	102.923
CIL1439S0032	31.32	36.607	48.18	62.467	72.133	102.807
CIL0922S0055	20.43	23.657	29.437	39.18	46.32	102.413
CIL1393S0048	1.533	2.7	6.663	20.387	49.837	101.65
CIL1326S0032	7.313	8.873	15.63	38.5	64.59	100.723
CIL0098S0001	8.64	10.313	25.837	26.677	38.747	100.713
CIL1316S0029	51.523	58.367	155.97	171.333	168.347	100.59
CIL1218S0050	39.21	63.31	78.083	78.367	84.463	100.417
CIL1030S0145	16.3	24.04	45.173	61.84	73.127	100.35
CIL1154S0052	2.397	1.4	9.387	14.517	42.757	100.15
CIL0921S0116	41.917	46.707	113.043	110.293	127.55	99.92
CIL0909S0187	23.35	35.177	39.757	63.6	75.653	99.9
CIL1006S0098	34.387	27.433	25.493	35.153	48.427	99.883
CIL1061S0089	3.48	1.937	6.453	16.223	29.757	99.84
CIL1244S0011	49.137	55.72	80.137	114.993	129.38	99.8
CIL1607S0011	298.553	243.397	204.41	211.817	224.207	99.7
CIL1258S0024	10.663	13.703	175.667	143.773	108.247	99.683
CIL1471S0031	10.773	7.183	17.623	21.197	32.03	99.203
CIL0945S0018	23.353	22.057	46.153	62.47	62.79	99.173
CIL0902S0092	9.757	10.73	40.507	36.527	34.79	99.057
CIL0982S0154	15.5	18.863	32.303	40.163	49.557	98.86
CIL1458S0020	1470.83	1273.95	784.617	495.97	447.577	98.81
CIL1298S0023	9.38	8.62	11.013	26.937	40.557	98.643
CIL1326S0009	8.117	6.89	10.973	18.443	30.413	98.397
CIL1015S0038	1.427	2.237	12.057	23.247	45.11	98.13
CIL1463S0018	0.62	0.343	17.197	15.36	17.11	97.937
CIL1304S0015	763.883	702.433	363.25	278.493	285.933	97.87
CIL1043S0061	7.32	7.82	21.483	42.223	54.663	97.803
CIL0465S0004	11.48	14.567	29.117	38.923	44.933	97.673
CIL1218S0043	16.173	8.807	90.943	82.127	87.66	97.673
CIL1185S0018	18.717	15.063	62.967	107.867	84.993	97.61
CIL0979S0016	829.41	620.223	432.037	338.147	315.173	97.583
CIL1263S0025	46.143	39.643	51.977	92.247	73.283	97.58
CIL0972S0097	46.837	28.877	31.513	41.643	50.163	97.567
CIL1251S0005	47.593	68.633	70.537	87.827	94.483	97.333
CIL0929S0183	13.327	16.037	24.91	38.133	53.833	97.16
CIL1184S0060	36.14	41.687	45.493	60.147	71.93	97.123
CIL1436S0045	39.04	50.527	56.83	73.39	70.557	97.027
CIL1082S0115	1502.65	980.483	702.483	508.44	372.377	96.85
CIL1271S0030	14.087	27.273	68.89	61.487	59.263	96.837
CIL0893S0001	2.497	4.423	6.287	15.717	23.06	96.73
CIL0922S0137	37.873	45.573	57.477	102.51	111.39	96.587
CIL1147S0026	15.563	17.307	34.577	83.663	109.743	96.493
CIL1453S0011	45.307	50.887	45.143	50.587	61.95	96.347
CIL1055S0070	44.08	37.707	41.413	42.723	51.53	95.84
CIL0970S0112	4.787	5.74	15.747	21.66	32.787	95.62
CIL1463S0020	219.88	143.63	193.293	214.533	190.757	95.497
CIL0285S0005	27.723	62.71	94.57	105.737	141.313	95.303
CIL0929S0182	11.28	14.077	24.603	33.5	54.063	95.263
CIL0120S0015	0.8	2.863	9.753	51.79	88.4	95.25
CIL1324S0040	22.33	28.88	33.287	42.75	48.433	95.227
CIL1093S0026	9.16	9.313	12.11	18.42	40.98	95.077
CIL1094S0065	24.26	29.197	52.233	75.097	96.413	95.057
CIL1157S0065	13.05	17.497	29.24	34.99	44.03	94.977
CIL1549S0007	26.27	34.973	35.153	55.817	60.667	94.51
CIL0962S0143	33.34	37.363	52.323	68.703	71.207	94.49
CIL1582S0033	26.26	18.207	66.663	59.157	53.05	94.387
CIL1482S0027	42.377	50.997	44.497	60.243	62.997	94.307
CIL1396S0003	10.193	17.113	23.24	91.947	71.163	94.277
CIL0984S0044	36.757	31.363	49.833	61.777	71.083	94.183
CIL1207S0032	326.19	451.21	327.073	218.837	143.207	94.173
CIL1495S0027	46.35	55.613	70.477	73.993	71.73	94.143
CIL1047S0143	4.777	6.217	15.567	55.787	84.437	94.04
CIL0967S0010	32.873	35.087	46.03	59.163	66.627	93.707
CIL0301S0006	26.417	43.437	40.48	197.407	125.087	93.59
CIL0938S0048	32.143	30.627	50.167	74.753	83.157	93.53
CIL1086S0062	15.367	14.583	30.177	40.317	51.123	93.31
CIL1359S0006	3.883	4.627	8.577	12.52	31.783	93.257
CIL1187S0015	14.14	17.033	30.437	44.773	65.097	93.23
CIL1602S0004	34.027	40.723	78.91	87.207	79.01	92.96
CIL1240S0059	365.02	358.203	263.107	280.067	253.64	92.877
CIL0922S0206	34.303	44.967	68.603	56.337	59.427	92.74
CIL1236S0013	118.797	49.003	52.717	76.89	39.433	92.637
CIL1550S0021	47.283	51.373	129.977	139.54	144.017	92.637
CIL1220S0037	37.87	66.733	66.41	79.127	74.493	92.567
CIL1579S0023	30.303	29.077	48.813	51.653	64.38	92.563
CIL1370S0020	6.623	6.757	10.07	17.003	33.507	92.483
CIL1444S0005	30.25	40.2	62.753	54.917	58.34	92.43
CIL1332S0040	0.453	0.487	3.8	22.463	39.473	92.36
CIL1448S0006	35.82	49.253	57.207	63.267	70.77	92.35
CIL0962S0040	38.49	34.05	45.15	53.71	65.313	91.98
CIL1142S0004	0.163	0.83	0.673	1.64	18.823	91.93
CIL1190S0054	30.567	35.393	38.17	42.36	52.997	91.923
CIL1110S0055	35.01	30.387	56.033	66.927	67.987	91.87
CIL1372S0034	8.023	6.81	37.927	43.347	56.933	91.773
CIL0940S0081	22.85	19.437	22.36	19.92	24.343	91.617
CIL0946S0052	8.743	13.143	33.123	35.947	40.867	91.607
CIL1555S0054	31.51	27.933	70.01	80.88	88.37	91.457
CIL1145S0162	2.003	4.34	19.633	13.073	29.843	91.377
CIL1273S0059	30.683	34.633	54.097	66.347	77.16	91.283
CIL0929S0076	226.737	179.05	197.163	190.427	179.51	91.11
CIL0957S0008	1894.93	1370.06	809.077	549.89	460.657	90.993
CIL1020S0069	3.3	2.623	28.21	36.19	46.56	90.893
CIL1047S0065	5.747	5.567	14.347	23.187	34.61	90.883
CIL1087S0035	4.133	6.24	9.627	21.783	34.413	90.68
CIL1253S0001	33.497	34.567	48.487	61.34	73.383	90.633
CIL0895S0167	2.813	2.73	3.88	6.983	22.997	90.623
CIL1037S0050	14.053	19.993	65.45	121.09	147.17	90.49
CIL0923S0091	23.143	25.873	34.517	48.513	57.243	90.427
CIL0893S0364	2.277	3.523	14.313	18.66	27.523	90.303
CIL1399S0010	32.747	67.463	90.163	72.177	93.297	90.247
CIL1341S0039	11.437	11.317	48.003	78.543	103.14	90.243
CIL1081S0027	4.217	6.023	9.023	24.713	41.26	90.187
CIL0946S0106	0.757	1.333	10.483	30.66	34.8	90.173
CIL1578S0024	526.293	451.8	342.967	295.2	259.92	89.587
CIL1211S0027	36.803	36.333	209.747	217.303	147.08	89.583
CIL0207S0017	43.163	42.35	43.283	50.41	62.647	89.507
CIL1370S0030	41.94	49.387	57.323	70.93	82.587	89.327
CIL1482S0008	42.717	49.37	45.863	57.027	61.617	89.26
CIL1390S0009	17.027	21.63	45.59	52.907	64.617	89.22
CIL1126S0059	35.023	36.733	50.48	53.467	68.7	89.207
CIL0912S0082	0.07	0.42	2.447	9.08	40.867	88.973
CIL1192S0064	0.313	0.653	2.337	9.097	29.57	88.87
CIL1083S0004	184.837	166.203	380.353	270.687	235.047	88.83
CIL1197S0080	21.527	18.227	32.53	46.977	60.693	88.597
CIL1048S0080	4.653	6.283	7.977	12.323	26.393	88.567
CIL1138S0010	32.787	42.317	58.263	55.157	50.327	88.563
CIL1043S0079	11.973	4.69	13.497	16.02	11.09	88.34
CIL0046S0008	22.13	24.763	40.41	62.967	74.93	88.333
CIL1021S0011	31.473	32.14	42.14	56.273	71.07	88.31
CIL1143S0032	36.393	25.987	69.673	79.647	77.927	88.257
CIL0840S0001	9.323	9.387	7.89	7.797	16.27	88.213
CIL0967S0176	40.79	43.103	62.257	73.52	82.697	88.097
CIL1546S0028	56.477	83.53	75.83	190.49	124.903	88.023
CIL1068S0062	0.56	0.92	2.16	6.397	23.95	87.893
CIL1374S0025	36.12	37.207	46.42	52.413	57.38	87.84
CIL1323S0041	43.87	46.847	64.76	73.36	78.003	87.79
CIL1084S0003	1.02	1.7	8.13	7.523	23.267	87.78
CIL1515S0042	42.617	59.22	85.73	93.65	99.683	87.743
CIL1290S0021	18.957	46.103	125.733	193.213	203.35	87.72
CIL1230S0063	39.523	41.273	56.337	66.383	69.547	87.647
CIL0967S0034	373.51	284.247	257.62	242.153	216.75	87.543
CIL1092S0073	8.873	15.257	22.76	19.39	26.913	87.49
CIL1335S0040	175.54	192.017	139.547	132.52	127.98	87.357
CIL1404S0010	0.963	2.053	3.513	10.653	27.64	87.26
CIL0271S0011	41.263	69.527	110.19	96.827	100.567	87.163
CIL0152S0008	5.003	23.627	64.287	160.423	194.667	87.033
CIL0608S0002	28.967	34.953	46.54	54.497	67.46	87.02
CIL1118S0087	1388.98	1153	711.193	515.693	420.227	87.013
CIL1371S0053	35.39	48.41	46.177	47.317	56.123	86.997
CIL0895S0085	18.867	14.227	17.86	40.713	52.913	86.833
CIL0914S0095	24.883	25.76	65.247	75.203	81.843	86.717
CIL1335S0012	44.627	41.32	95.93	97.673	106.743	86.597
CIL1133S0030	19.86	20.853	43.593	60.707	69.413	86.57
CIL1294S0031	14.9	19.33	21.723	44.073	43.313	86.533
CIL1009S0088	9.783	15.5	19.06	24.083	43.31	86.517
CIL0158S0013	14.25	14.3	36.873	39.2	47.66	86.407
CIL1032S0024	32.887	44.49	84.577	95.967	96.027	86.177
CIL1245S0062	20.88	25.757	24.72	62.46	60.85	86.173
CIL1198S0045	19.92	17.707	20.55	27.027	46.883	86.13
CIL1249S0040	15.447	16.757	44.057	77.27	72.8	86.123
CIL1425S0048	34.667	33.74	119.733	112.367	121.077	86.08
CIL1396S0021	7.63	6.923	12.313	28.833	48.42	85.82
CIL0929S0058	6.737	4.543	10.133	11.997	14.51	85.793
CIL1276S0030	0.63	2.873	6.637	28.46	53.63	85.787
CIL1403S0024	13.513	13.49	21.767	25.523	34.413	85.763
CIL1402S0012	209.617	263.417	213.903	205.477	167.647	85.687
CIL1153S0126	52.903	68.667	115.18	106.23	99.41	85.51
CIL1132S0014	17.533	15.287	26.3	40.213	45.717	85.43
CIL1447S0041	41.893	49.433	130.807	145.71	147.713	85.143
CIL1358S0043	10.453	19.043	37.833	60.167	57.29	85.12
CIL1047S0089	1.747	2.763	6.577	9.54	22.89	84.957
CIL1391S0026	0.22	0.337	1.263	3.667	13.443	84.773
CIL1131S0083	42.317	43.337	60.41	73.76	75.693	84.76
CIL1446S0057	18.14	27.27	38.22	66.243	71.057	84.673
CIL1429S0007	9.753	11.27	23.007	21.457	29.167	84.297
CIL1520S0006	6.02	5.35	4.84	27.237	47.847	84.237
CIL1381S0001	185.823	145.783	154.007	167.43	155.1	84.183
CIL1149S0052	13.857	16.75	26.893	35.65	48.567	84.157
CIL0272S0011	42.083	41.433	79.007	81.433	86.857	84.087
CIL1112S0031	24.553	57.643	40.647	44.847	68.18	83.92
CIL0940S0107	15.617	23.82	35.643	50.243	55.277	83.89
CIL0914S0094	17.653	16.507	85.07	95.383	67.287	83.8
CIL1051S0031	37.987	41.917	53.58	72.333	81.563	83.517
CIL1057S0090	25.817	31.227	42.9	58.893	63.41	83.413
CIL0003S0002	224.833	203.867	136.593	145.783	128.95	83.337
CIL1048S0012	1.033	0.733	2.233	11.22	24.403	83.073
CIL0818S0001	31.893	35.353	55.113	58.99	60.543	83.033
CIL1371S0106	34.52	43.31	54.447	57.087	59.06	82.99
CIL1193S0080	33.957	33.877	42.12	58.45	73.687	82.757
CIL1060S0090	18.233	19.423	55.417	92.967	75.73	82.673
CIL1175S0039	2.517	2.847	9.023	3.473	26.83	82.64
CIL1310S0034	1.8	5.517	26.313	22.757	34.553	82.603
CIL0970S0157	1.793	3.227	11.263	27.377	52.547	82.593
CIL0312S0011	35.197	48.103	57.37	77.033	70.167	82.563
CIL1568S0004	0.727	1.79	1.023	4.62	19.777	82.503
CIL1187S0023	1.083	1.317	11.007	28.177	42.28	82.457
CIL1120S0020	7.637	8.707	10.957	19	33.077	82.333
CIL0909S0148	1.653	3.51	10.647	17.123	28.163	82.23
CIL1068S0024	0.347	0.567	4.957	10.167	20.447	82.22
CIL0990S0161	3365.03	3317.65	1862.53	1119.4	808.507	82.177
CIL1330S0001	4.18	6.25	25.59	16.627	21.197	82.143
CIL0967S0016	40.383	26.903	61.247	77.693	80.29	82.04
CIL0914S0130	15.127	14.067	31.973	47.04	58.767	82.013
CIL1196S0047	9.6	8.977	12.163	20.21	43.94	81.983
CIL1425S0047	32.703	33.663	119.397	104.903	113.457	81.84
CIL1102S0061	2.267	5.323	57.903	43.513	39.94	81.587
CIL1251S0030	18.317	11.96	18.64	28.967	35.197	81.32
CIL1254S0069	20.993	26.753	21.263	25.18	33.427	81.263
CIL1503S0022	16.643	24.747	29.803	45.45	54.967	81.263
CIL1196S0043	9.377	13.89	32.35	42.41	44.06	81.213
CIL1043S0081	4.057	4.15	25.94	37.103	26.133	80.947
CIL1387S0023	35.03	30.25	46.437	62.23	64.877	80.93
CIL1407S0004	21.17	21.073	37.24	37.45	43.207	80.883
CIL0171S0002	2.943	5.153	7.797	18.98	33	80.847
CIL0967S0033	28.327	30.557	68.347	72.167	85.187	80.78
CIL1199S0016	0.273	0.69	1.32	3.993	17.58	80.763
CIL1131S0039	10.077	12.357	22.84	24.04	33.223	80.657
CIL1400S0029	38.537	37.803	49.907	51.13	57.343	80.573
CIL0893S0296	47.14	66.477	75.84	119.123	96.123	80.567
CIL1006S0077	22.793	19.783	23.21	29.793	39.613	80.54
CIL1136S0066	654.43	517.917	395.533	334.233	286.99	80.393
CIL0912S0139	34.193	33.783	55.58	64.223	72.403	80.39
CIL0940S0175	15.023	16.1	25.623	32.937	43.013	80.37
CIL1100S0107	8.953	8.167	15.767	16.627	25.033	80.337
CIL1231S0031	29.753	40.563	53.62	55.577	65.08	80.317
CIL1267S0020	33.63	43.173	47.473	71.7	73.187	80.297
CIL1189S0012	23.073	19.627	57.527	56.923	65.093	80.123
CIL1060S0094	22.153	15.687	26.37	36.467	47.133	80.107
CIL1163S0015	8.493	8.677	30.457	41.317	46.913	80.053
CIL0962S0117	3.73	4.437	13.3	45.01	58.01	79.873
CIL1155S0051	215.9	231.033	138.523	132.313	136.643	79.873
CIL1090S0039	10.46	12.963	120.163	89.403	101.07	79.86
CIL1034S0047	35.32	52.3	53.66	58.65	62.807	79.777
CIL1055S0059	4.433	2.7	12.113	14.487	33.927	79.747
CIL1375S0032	39.757	39.66	52.987	99.017	110.677	79.737
CIL1082S0003	24.86	25.613	49.87	59.557	73.207	79.633
CIL1064S0094	28.773	34.693	45.213	53.907	59.783	79.623
CIL1346S0028	89.563	91.697	427.25	273.95	218.377	79.483
CIL0967S0156	20.33	19.24	58.98	57.363	65.797	79.427
CIL1153S0068	3.05	5.103	19.163	31.27	47.4	79.35
CIL1078S0051	41.273	86.24	107.217	152.693	152.527	79.297
CIL1348S0009	23.117	50.203	71.8	39.533	37.363	79.283
CIL1551S0016	1.073	1.547	16.09	54.397	74.47	79.273
CIL1361S0025	25.947	26.25	30.257	30.717	38.44	79.26
CIL1006S0039	1.267	1.327	3.88	5.11	13.53	78.867
CIL1321S0020	17.41	19.06	27.023	31.22	33.853	78.73
CIL0908S0137	600	563.037	414.73	299.593	250.95	78.557
CIL0972S0008	16.247	21.277	20.533	20.657	35.557	78.557
CIL1324S0053	27.483	24.883	37.683	47.07	55.89	78.52
CIL1400S0012	43.457	57.047	67.737	90.39	79.167	78.377
CIL1112S0091	10.783	13.433	23.353	26.453	35.217	78.317
CIL0091S0003	12.67	13.08	14.057	13.863	32.593	78.077
CIL0940S0185	35.443	36.683	59.983	69.803	67.96	78.053
CIL1147S0029	27.28	42.723	11.623	30.217	50.397	77.96
CIL1148S0011	36.22	38.747	86.13	123.75	113.267	77.93
CIL0657S0001	1.877	4.85	9.8	33.44	47.15	77.89
CIL0140S0014	36.57	46.653	41.47	49.553	55.023	77.833
CIL1325S0036	30.523	37.943	49.223	53.957	59.547	77.83
CIL0945S0153	19.807	25.36	30.583	38.777	48.62	77.8
CIL1595S0049	240.117	222.49	158.893	148.017	118.513	77.753
CIL0979S0006	4.02	11.823	20.5	53.72	81.923	77.72
CIL1068S0093	23.943	20.593	32.453	45.4	46.897	77.673
CIL1199S0004	29.077	30.29	36.967	50.31	56.303	77.573
CIL1003S0104	23.18	22.52	35.633	74.437	82.437	77.47
CIL0087S0006	33.067	30.2	67.377	56.43	64.183	77.44
CIL1030S0075	35.873	41.797	49.42	51.03	55.07	77.403
CIL0391S0010	9.117	11.18	49.637	72.937	96.77	77.37
CIL1155S0060	24.293	14.407	32.167	35.413	48.137	77.37
CIL0970S0118	3.883	22.21	27.6	25.413	35.73	77.367
CIL1197S0009	8.103	9.203	22.363	29.367	47.467	77.27
CIL1246S0102	23.637	41.147	45.093	45.987	54.96	77.187
CIL1315S0009	22.763	31.33	38.71	38.713	44.513	77.073
CIL0978S0169	22.93	21.37	31.637	39.313	42.043	76.917
CIL1508S0040	22.137	23.097	109.59	154.267	96.277	76.897
CIL0262S0009	20.65	21.873	65.633	63.747	53.887	76.877
CIL1405S0051	424.607	545.54	366.133	269.15	256.163	76.673
CIL0309S0003	1177.23	1288.03	659.83	655.66	562.987	76.447
CIL1037S0094	35.303	35.543	40.277	53.293	55.25	76.11
CIL1001S0017	33.263	33.12	47.193	71.253	73.233	76.057
CIL0942S0058	170.253	126.683	137.33	162.823	125.757	75.993
CIL1343S0031	27.347	41.653	39.397	45.043	55.053	75.973
CIL1294S0037	12.87	17.053	26.163	41.27	41.147	75.65
CIL1562S0006	29.203	41.27	50.72	51.243	50.503	75.603
CIL0246S0008	665.29	332.04	464.907	222.47	63.647	75.587
CIL1009S0100	12.89	22.51	53.457	91.677	88.45	75.537
CIL1030S0106	4.167	5.023	10.003	15.85	30.04	75.537
CIL1025S0026	0.9	2.143	1.84	4.193	16.21	75.507
CIL1492S0003	13.327	11.267	28.833	28.62	34.827	75.417
CIL1283S0008	31.083	28.75	70.36	85.253	95.507	75.387
CIL1295S0033	21.027	19.473	38.947	42.623	47.11	75.263
CIL1273S0060	18.717	27.663	41.967	49.903	51.663	75.243
CIL1219S0058	21.117	26.7	46.323	44.123	42.32	75.157
CIL1315S0017	6.757	8.853	56.597	72.183	79.723	75.06
CIL1172S0029	26.74	31.157	53.087	77.667	88.277	74.87
CIL1100S0106	0.347	0.42	4.553	8.653	20.243	74.677
CIL0899S0163	2.867	1.46	2.753	15.997	42.29	74.643
CIL1023S0042	226.353	72.103	56.153	94.677	96.467	74.64
CIL0914S0154	6.227	6.43	22.17	31.18	38.13	74.62
CIL1330S0024	28.127	29.56	36.373	57.04	65.4	74.52
CIL1066S0099	13.77	14.853	33.337	39.5	43.797	74.513
CIL1294S0078	12.983	10.347	30.507	32.853	42.767	74.497
CIL1153S0014	5.04	5.413	3.167	16.67	27.92	74.233
CIL1443S0009	66.533	99.947	113.69	134.547	109.287	74.167
CIL1018S0108	2.493	1.66	5.843	28.967	39.427	73.95
CIL1446S0069	0.327	0.283	4.153	12.803	21.953	73.943
CIL1254S0037	1.287	1.24	43.21	45.17	29.337	73.867
CIL1462S0029	11.027	16.417	34.903	52.933	62.24	73.817
CIL1092S0099	22.67	25.28	19.633	24.923	44.097	73.77
CIL0929S0147	26.12	28.17	50.713	57.853	66.973	73.75
CIL1446S0064	1055.37	884.057	566.163	438.45	389.303	73.7
CIL1554S0004	3.71	8.107	15.58	22.83	42.75	73.647
CIL0513S0005	6.657	11.217	32.333	47.507	44.443	73.583
CIL0909S0105	6.457	8.347	10.887	18.543	24.527	73.433
CIL1184S0049	0.72	2.457	7.073	17.337	34.24	73.3
CIL1460S0008	33.64	23.563	31.82	87.567	101.09	73.267
CIL1283S0022	6.533	6.15	15.023	19.903	26.32	73.173
CIL1219S0091	144.92	98.093	48.983	66.437	74.523	73.17
CIL0951S0120	32.723	57.73	64.047	79.88	84.7	72.987
CIL1189S0063	4.887	5.773	31.037	40.76	42.19	72.963
CIL1189S0034	18.27	16.07	29.647	32.9	41.023	72.82
CIL1444S0004	5.27	5.033	8.977	11.82	20.957	72.747
CIL0970S0037	2.403	1.727	8.97	31.467	34.353	72.71
CIL1064S0028	25.707	34.753	66.11	73.003	82.16	72.543
CIL1327S0004	25.07	29.363	43.11	57.073	57.97	72.41
CIL0128S0033	23.743	25.867	29.693	34.747	41.97	72.34
CIL0923S0066	11.403	15.07	21.43	20.06	27.4	72.24
CIL0302S0011	30.32	24.277	31.62	38.707	47.797	72.153
CIL1018S0042	0.767	0.56	3.677	12.633	24.923	72.153
CIL0176S0047	6.323	7.18	17.703	17.63	22.99	72.143
CIL1110S0050	12.063	14.017	33.103	30.867	36.633	72.103
CIL1265S0077	14.743	15.28	61.347	92.24	113.233	72.043
CIL1135S0039	651.647	528.137	370.41	275.257	261.783	71.98
CIL1152S0003	31.71	33.39	103.51	74.73	73.613	71.88
CIL1153S0035	12.29	16.48	18.783	46.07	53.517	71.777
CIL1018S0016	37	39.09	74.733	62.65	70.453	71.75
CIL1093S0043	33.123	41.787	40.593	42.313	47.957	71.687
CIL0047S0019	20.983	32.2	27.15	22.727	31.513	71.677
CIL0355S0005	4.89	8.733	31.257	26.013	38.467	71.633
CIL1131S0044	16.1	16.997	18.96	40.147	43.4	71.567
CIL1061S0076	3.16	3.567	67.8	92.16	62.2	71.493
CIL1446S0023	26.76	36.693	40.28	45.133	48.57	71.47
CIL1018S0043	22.333	22.197	29.61	40.58	48.177	71.39
CIL1197S0008	6.993	9.947	28.373	37.343	43.64	71.083
CIL1555S0012	31.253	37.557	38.21	56.22	55.94	70.98
CIL1240S0047	1.813	1.89	6.707	6.497	20.86	70.88
CIL0942S0223	35.533	22.627	15.01	38.84	56.22	70.833
CIL0448S0004	14.907	34.697	57.957	106.01	91.16	70.767
CIL0092S0016	33.073	53.703	130.277	94.153	94.687	70.723
CIL1431S0020	61.16	240.283	85.183	122.757	86.387	70.667
CIL0919S0178	5.697	9.17	31.827	32.683	45.637	70.55
CIL1353S0034	5.137	16.763	101.47	76.423	63.653	70.547
CIL1095S0068	24.24	27.507	37.443	42.383	49.88	70.46
CIL0990S0157	12.553	11.02	14.987	18.743	32.29	70.407
CIL1118S0012	0.25	0.493	0.683	18.473	36.393	70.403
CIL0211S0005	494.81	734.847	535.677	331.067	175.013	70.247
CIL1263S0039	51.233	53.397	92.047	92.967	105.57	70.117
CIL0929S0055	1673.8	1066.84	563.133	460.76	391.793	70.107
CIL1130S0052	33.467	32.403	32.043	46.737	54.253	70.013
CIL1326S0043	238.983	202.377	88.36	90.97	100.647	70.013
CIL1425S0014	5.403	4.433	15.253	20.52	27.4	69.997
CIL0962S0095	34.703	41.407	46.983	52.127	56.58	69.963
CIL1340S0038	41.103	64.62	103.313	147.407	104.707	69.89
CIL1009S0099	33.19	36.69	54.96	56.343	64.583	69.84
CIL0914S0132	6.513	14.73	8.437	27.59	33.397	69.817
CIL1020S0048	2.04	2.593	14.893	25.8	40.773	69.817
CIL1507S0003	29.677	28.113	49.933	45.563	51.973	69.793
CIL0982S0028	77.967	73.62	158.97	104.413	84.393	69.767
CIL0967S0011	28.037	30.237	42.367	47.14	55.587	69.737
CIL1512S0004	1.753	1.003	6.117	21.353	26.173	69.723
CIL1151S0017	32.39	42.6	49.33	52.687	54.973	69.677
CIL1461S0015	2.117	5.86	18.683	46.03	74.28	69.527
CIL1265S0068	24.957	20.59	31.75	47	65.97	69.5
CIL1531S0006	22.57	52.177	42.21	40.973	43.41	69.473
CIL0899S0005	2.64	1.947	3.477	10.46	30.973	69.467
CIL0895S0020	2.327	9.043	38.277	134.733	170.86	69.133
CIL0427S0005	0.457	0.393	3.853	17.3	23.513	69.117
CIL1520S0012	160.48	166.4	141.97	108.927	121.413	68.897
CIL1224S0007	14.193	15.25	43.87	53.547	71.513	68.793
CIL1122S0046	1959.52	1768.72	898.607	472.32	359.073	68.733
CIL1242S0044	15.823	20.447	21.71	30.203	37.023	68.717
CIL1456S0049	6.78	7.327	31.857	36.357	45.443	68.717
CIL1031S0122	390.04	322.92	208.95	179.91	156.44	68.693
CIL1270S0002	9.08	11.433	34.593	47.507	61.833	68.583
CIL0923S0090	19.307	20.55	26.707	39.307	46.557	68.443
CIL0957S0051	35.397	31.13	129.253	120.35	105.827	68.217
CIL1204S0061	3.823	3.223	9.85	24.023	38.197	68.17
CIL0049S0017	13.083	23.757	13.197	97.553	81.433	68.113
CIL1144S0024	11.71	11.31	28.657	32.57	31.933	68.11
CIL1071S0055	0.23	0.54	4.37	38.273	43.163	68.053
CIL1230S0058	33.767	52.803	53.713	53.83	58.747	67.993
CIL1030S0031	6.017	7.283	6.837	18.923	34.24	67.977
CIL0310S0017	2.693	3.793	28.377	30.593	43.27	67.94
CIL1087S0057	31.99	37.54	63.95	101.567	98.793	67.893
CIL1614S0016	30.52	30.63	39.733	45.253	42.563	67.857
CIL1023S0074	7.27	6.847	11.243	18.79	24.327	67.617
CIL1584S0005	19.26	18.113	61.213	51.15	58.05	67.517
CIL1526S0040	2.127	2.593	4.84	8.88	21.72	67.507
CIL0996S0059	0.273	0.55	7.657	39.527	55.55	67.45
CIL1184S0026	919.89	730.5	479.343	320.28	296.357	67.42
CIL1038S0030	22.603	28.07	50.3	53.92	57.617	67.21
CIL1577S0044	10.18	11.96	44.853	33.413	39.667	67.197
CIL0170S0021	1.643	1.443	5.133	12.753	16.907	67.17
CIL0962S0043	15.923	18.58	23.59	27.61	31.623	67.137
CIL1210S0022	0.95	1.603	2.44	6.29	13.063	67.067
CIL1031S0044	31.51	31.433	48.01	54.53	59.167	66.933
CIL1180S0030	161.67	134.75	111.413	100.533	97.143	66.897
CIL0962S0098	23.77	25.01	56.24	62.497	66.427	66.89
CIL1304S0003	274.247	224.157	192.683	171.983	162.37	66.863
CIL1144S0052	10.82	10.363	19.957	40.42	49.04	66.86
CIL1144S0072	57.737	73.39	141.523	135.757	124.113	66.76
CIL1047S0029	32.467	35.223	49.8	56.76	62.177	66.607
CIL1249S0019	543.623	530.083	351.103	291.063	288.857	66.607
CIL0940S0051	23.69	22.603	29.71	41.967	42.763	66.49
CIL1020S0022	17.623	13.823	30.63	35.043	36.32	66.48
CIL1456S0043	10.017	9.61	11.387	23.093	31.747	66.383
CIL0979S0057	9.303	10.57	16.967	18.033	26.28	66.25
CIL1113S0021	2.313	6.287	24.757	33.453	49.743	66.213
CIL0782S0003	65.577	85.937	185.43	181.137	167.33	66.16
CIL1236S0047	77.177	36.367	38.11	47.95	61.14	66.107
CIL1303S0040	11.43	16.627	20.49	18.043	23.967	66.1
CIL1047S0037	0.997	2.097	9.317	33.15	43.92	65.973
CIL1071S0027	24.877	26.583	33.073	40.283	42.413	65.97
CIL1282S0021	33.05	38.943	67.753	72.18	77.513	65.94
CIL1133S0022	19.73	24.513	30.353	31.547	50.397	65.927
CIL0135S0010	2.093	2.323	8.983	14.3	20.727	65.717
CIL1240S0005	22.873	29.433	31.017	29.117	34.447	65.683
CIL1575S0020	56.627	63.88	143.233	87.827	72.61	65.673
CIL1443S0020	0.327	0.46	1.34	1.143	17.6	65.583
CIL1256S0053	429.177	357.267	243.973	204.61	177.097	65.567
CIL1562S0004	6.657	6.793	40.1	38.253	82.147	65.43
CIL0893S0378	2.867	4.28	17.2	22.593	25.88	65.397
CIL1104S0028	9.557	10.17	24.46	30.147	40.413	65.39
CIL1446S0006	18.39	20.993	30.923	30.477	34.527	65.337
CIL1298S0017	32.397	40.273	36.213	47.963	53.05	65.33
CIL1092S0061	155.363	131.26	122.49	125.673	120.423	65.297
CIL0942S0005	29.92	32.3	36.863	37.323	43.113	65.28
CIL0902S0188	26.25	25.74	36.873	40.52	43.767	65.26
CIL1147S0067	1.997	2.997	44.793	42.02	50.423	65.253
CIL1401S0016	4.86	20.64	67.263	65.153	82.697	65.25
CIL1031S0133	209.53	230.85	183.883	166.447	130.837	65.217
CIL1361S0028	969.94	860.46	622.677	423.843	364.653	65.21
CIL0919S0040	7.633	9.513	12.637	24.01	33.757	65.153
CIL0929S0206	23.527	30.727	88.807	90.063	101.113	65.143
CIL1370S0032	1.67	2.117	21.017	30.11	35.897	65.137
CIL0914S0116	3.937	2.773	8.57	8.017	19.383	65.07
CIL1120S0018	166.607	158.387	138.22	142.133	120.02	64.98
CIL1263S0033	0.69	1.37	0.837	2.52	20.673	64.837
CIL0945S0020	11.3	11.687	34.04	32.267	42.31	64.773
CIL0908S0166	240.873	216.117	171.32	163.263	144.967	64.693
CIL1230S0026	73.023	30.573	62.04	76.1	56.11	64.687
CIL0902S0015	13.6	20.917	27.863	28.91	42.56	64.677
CIL0922S0246	212.767	172.14	137.617	152.117	135.727	64.66
CIL0979S0104	7.37	9.593	14.24	15.51	21.283	64.617
CIL0293S0006	29.463	27.737	26.33	31.44	36.803	64.587
CIL1502S0054	9.623	7.783	10.86	23.763	27.723	64.543
CIL1148S0040	6.027	8.343	15.237	16.583	27.853	64.46
CIL1614S0017	30.01	29.923	43.367	43.4	39.81	64.393
CIL1248S0014	30.363	30.99	51.957	55.903	60.03	64.373
CIL1535S0027	30.047	31.14	86.497	57.63	49.53	64.177
CIL1216S0045	3.41	3.69	6.043	10.36	23.127	64.137
CIL1372S0018	19.17	17.807	33.153	31.12	34.58	64.137
CIL0940S0178	20.213	22.783	31.723	31.993	37.223	64.093
CIL0978S0131	1.14	3.93	29.29	93.223	124.147	64.087
CIL0228S0019	8.1	17.273	25.223	20.607	25.58	64.07
CIL0962S0121	12.037	12.95	20.14	30.39	39.2	64.003
CIL1002S0006	2.8	5.267	9.397	30.44	43.1	63.993
CIL1001S0087	0.397	0.98	19.633	48.063	69.113	63.82
CIL0321S0005	0.58	0.69	8.19	28.363	33.61	63.427
CIL1154S0066	15.71	19.553	44.617	55.447	50.153	63.393
CIL0192S0002	21.633	25.483	22.94	24.02	32.157	63.337
CIL0504S0004	11.953	10.967	22.133	29.7	35.857	63.207
CIL1433S0017	23.723	24	37.237	33.747	41.803	63.177
CIL0984S0057	9.207	9.68	16.39	21.51	31.423	63.143
CIL0906S0106	1.55	13.64	11.943	7.05	14.69	63.043
CIL1348S0036	5.713	7.693	20.093	26.08	31.927	62.853
CIL1071S0085	24.54	30.66	28.347	17.517	36.797	62.847
CIL1196S0035	13.34	11.7	16.877	20.433	29.723	62.71
CIL1596S0006	29.26	34.63	53.893	56.853	60.19	62.69
CIL1352S0006	1.623	2.467	0.727	22.66	26.53	62.59
CIL0114S0007	0.623	4.153	15.617	14.477	19.017	62.553
CIL1176S0018	6.273	5.89	6.353	16.067	25.963	62.407
CIL1167S0005	5.873	7.897	21.373	33.93	44.96	62.4
CIL0919S0083	21.003	20.633	26.377	28.88	34.037	62.343
CIL0121S0004	25.323	36.84	33.87	46.68	48.243	62.217
CIL1120S0029	26.217	28.873	35.21	38.75	41.02	62.137
CIL0970S0115	3.76	3.843	12.21	14.083	23.02	62.13
CIL1505S0061	6.287	7.073	24.94	20.743	28.717	62.107
CIL1335S0009	10.9	11.773	23.083	26.357	32.47	62.05
CIL0957S0022	9.86	8.227	14.997	38.363	50.873	62.04
CIL1141S0051	28.84	32.653	74.717	73.473	62.563	62.037
CIL0967S0132	9.053	9.477	17.347	58.78	76.87	62
CIL1132S0006	9.317	14.363	29.86	36.88	39.357	62
CIL1268S0023	19.777	30.95	56.197	35.247	32.337	61.987
CIL1384S0010	4350.03	3064.65	1282.15	728.11	595.75	61.97
CIL0893S0153	0.78	0.553	2.73	4.213	13.647	61.92
CIL0218S0030	2.653	12.217	9.36	19.017	28.857	61.867
CIL0914S0054	21.51	26.723	25.407	29.87	36.003	61.86
CIL0895S0079	15.82	18.743	36.34	48.447	53.953	61.8
CIL0945S0148	21.34	22.073	27.627	35.193	43.873	61.697
CIL1324S0061	16.57	18.7	51.243	49.927	57.693	61.687
CIL1512S0041	144.697	123.57	85.723	87.267	77.08	61.67
CIL0923S0174	21.85	25.933	27.013	33.237	38.253	61.53
CIL0001S0049	27.613	35.537	47.073	40.293	48.203	61.52
CIL1153S0045	13.517	16.51	36.887	34.713	40.18	61.447
CIL1221S0009	25.89	25.783	35.97	48.323	54.97	61.403
CIL1330S0042	24.2	24.813	29.87	46.903	51.137	61.4
CIL0979S0090	22.41	19.617	40.057	39.567	48.617	61.347
CIL0893S0034	34.387	40.613	38.207	85.953	68.817	61.253
CIL0908S0093	26.11	34.963	51.047	78.017	66.747	61.253
CIL1055S0025	3.093	5.36	7.81	26.117	42.63	61.197
CIL1464S0020	1.767	1.833	10.95	23.81	28.03	61.11
CIL1231S0023	6.033	7.68	10.43	11.347	15.74	61.097
CIL1501S0036	49.58	70.8	139.123	129.38	111.787	61.027
CIL1167S0038	241.73	205.247	152.847	133.583	128.12	60.993
CIL1032S0144	22.127	19.797	48.55	40.813	36.323	60.957
CIL0935S0136	4.01	3.72	17.963	29.267	31.97	60.91
CIL1575S0021	11	11.397	16.51	15.883	25.707	60.837
CIL1051S0068	0.503	1.283	8.893	19.563	29.433	60.587
CIL0912S0098	158.617	128.807	125.033	112.27	97.527	60.577
CIL0942S0114	27.5	39.353	49.673	57.823	52.243	60.537
CIL1429S0019	28.707	28.183	32.34	45.48	46.77	60.42
CIL1106S0032	3.26	2.797	13.257	21.1	31.06	60.373
CIL1087S0042	234.317	232.8	160.517	158.14	144.17	60.277
CIL1180S0049	404.457	444.893	209.89	177.933	188.35	60.257
CIL0118S0004	10.567	19.433	41.823	38.52	39.227	60.243
CIL0992S0064	12.06	12.693	19.59	27.36	30.873	60.137
CIL0976S0082	9.52	14.497	14.403	23.793	24.24	60.103
CIL1126S0027	26.667	28.953	41.523	46.253	53.273	60.073
CIL0922S0048	3.487	5.05	15.703	8.153	15.193	60.017
CIL0359S0021	24.64	26.44	26.327	36.737	39.72	59.947
CIL1326S0042	213.837	280.183	52.523	53.653	65.373	59.937
CIL1365S0022	18.593	20.647	27.753	33.397	38.933	59.687
CIL1136S0027	25.917	30.92	48.023	47.55	44.99	59.68
CIL1493S0018	27.753	34.807	35.417	42.523	44.757	59.647
CIL1078S0106	4.657	8.91	9.497	10.217	21.13	59.573
CIL0368S0009	4.66	4.437	7.937	15.037	28.797	59.57
CIL1264S0034	25.107	24.743	28.947	33.433	41.173	59.52
CIL0131S0030	26.95	59.413	66.797	103.757	101.167	59.507
CIL1312S0020	29.327	37.67	48.053	48.587	53.257	59.447
CIL1405S0006	3.14	3.803	24.167	51.083	60.43	59.447
CIL1153S0033	1.383	2.82	7.797	15.553	29.777	59.423
CIL0355S0006	0.583	2.887	7.763	10.707	18.48	59.337
CIL1156S0088	11.157	14.597	33.007	36.277	38.853	59.33
CIL0935S0125	17.48	17.42	23.36	33.29	35.45	59.287
CIL1310S0039	321.37	282.12	166.19	156.8	164.207	59.28
CIL0912S0171	5.293	7.41	22.847	31.62	37.337	59.263
CIL1494S0050	17.527	19.227	27.367	28.467	36.923	59.19
CIL1040S0068	3.657	3.543	7.91	14.7	20.117	59.17
CIL0602S0002	16.073	15.077	38.157	34.107	36.557	59.153
CIL1486S0023	20.257	29.107	40.947	36.127	46.993	59.147
CIL1184S0030	18.917	12.19	21.26	26.38	30.277	59.073
CIL1551S0004	5.287	9.357	167.607	114.553	134.863	59.063
CIL1096S0023	1.303	5.963	19.113	19.707	19.573	58.893
CIL1028S0048	133.923	160.917	143.437	145.273	119.597	58.833
CIL0945S0093	35.3	36.587	144.547	111.027	87.49	58.83
CIL1185S0020	8.957	11.36	13.807	36.623	45.487	58.71
CIL0102S0011	125.96	63.44	78.217	118.737	92.11	58.7
CIL1084S0001	0.763	1.8	5.533	4.38	17.29	58.663
CIL1403S0048	29.21	27.703	43.433	44.66	46.02	58.547
CIL1043S0046	4.327	5.877	15.683	18.417	25.903	58.467
CIL1135S0066	0.11	0.4	0.823	0.757	11.173	58.463
CIL1155S0003	121.19	139.257	123.797	100.69	91.067	58.28
CIL1387S0047	5.467	6.567	17.713	42.827	37.573	58.193
CIL1479S0019	156.627	121.763	200.6	102.333	78.907	58.15
CIL1464S0013	5.893	7.61	10.76	8.45	9.747	58.043
CIL1413S0005	994.05	808.863	503.447	387.473	360.877	58.037
CIL1564S0033	10.307	7.807	20.953	44.773	45.9	58.02
CIL0392S0001	0.473	1.847	7.873	18.443	320.943	57.973
CIL0922S0030	127.663	91.45	134.02	196.803	123.553	57.94
CIL0970S0165	28.76	32.67	83.58	66.6	35	57.933
CIL1225S0038	0.4	0.503	10.913	23.073	30.32	57.847
CIL0307S0009	25.653	27.767	32.127	35.803	41.727	57.813
CIL1053S0035	162.593	160.267	165.543	212.673	160.817	57.777
CIL1266S0038	18.517	8.783	33.307	56.613	75.5	57.73
CIL1579S0009	0.893	2.403	41.043	49.093	69.277	57.697
CIL1093S0008	149.25	120.433	121.327	124.927	117.673	57.573
CIL1325S0084	3.253	3.203	16.383	21.11	25.49	57.49
CIL1555S0004	16.973	13.373	206.11	189.317	48.837	57.463
CIL0951S0098	27.65	33.577	45.547	60.337	64.493	57.453
CIL0909S0052	1.763	7.29	55.977	122.757	150.047	57.387
CIL1219S0036	27.75	33.007	39.387	51.22	55.553	57.33
CIL1132S0055	0.48	0.3	7	15.607	17.717	57.317
CIL1443S0013	21.877	25.713	33.867	39.717	42.967	57.287
CIL0218S0015	11.24	15.717	30.447	32.227	39.777	57.087
CIL0937S0007	12.127	14.5	7.037	24.3	38.133	57.047
CIL1076S0025	27.103	30.877	40.947	42.687	49.05	56.993
CIL0940S0159	12.667	12.743	35.373	44.753	48.083	56.953
CIL1075S0064	21.07	23.5	54.02	42.647	56.523	56.85
CIL1552S0005	1.523	8.383	13.827	68.327	80.543	56.807
CIL1071S0034	146.33	189.773	133.07	120.287	107.573	56.803
CIL1134S0059	13.987	17.53	21.947	32.1	37.12	56.79
CIL1457S0001	9.923	9.657	28.563	33.057	32.547	56.783
CIL1071S0018	22.947	17.03	62.683	68.913	51.277	56.727
CIL1387S0018	23.1	24.61	33.773	38.587	43.76	56.723
CIL0909S0118	28.94	40.723	41.923	59.183	63.177	56.59
CIL1325S0072	162.937	137	97.213	82.683	85.8	56.577
CIL1266S0048	6.71	11.433	34.417	43.533	51.9	56.49
CIL0948S0068	38.607	55.913	74.76	78.38	74.793	56.393
CIL0990S0026	9.363	25.347	20.113	59.65	49.153	56.393
CIL0948S0048	22.773	22.013	39.483	45.57	53.907	56.367
CIL1577S0037	12.593	13.713	23.563	23.583	28.703	56.367
CIL1181S0005	1.703	4.093	30.6	35.007	51.417	56.36
CIL0990S0062	4.407	9.247	106.147	256.523	305.253	56.303
CIL1006S0076	21.663	22.377	25.833	30.58	35.353	56.297
CIL1246S0003	37.133	10.087	49.063	121.59	83.173	56.257
CIL1417S0108	17.39	19.547	29.603	30.197	41.763	56.227
CIL0978S0055	3.473	7.007	20.077	28.49	36.987	56.213
CIL1084S0089	22.78	28.837	30.047	33.273	33.187	56.193
CIL1384S0060	19.32	27.82	27.743	22.08	29.413	56.187
CIL1324S0023	25.873	27.813	28.987	33.723	39.22	56.15
CIL0922S0166	11.11	11.38	22.31	31.223	29.37	56.013
CIL1061S0134	20.84	23.163	33.88	42.23	47.303	55.91
CIL1484S0017	13.77	13.78	41.77	31.373	31.473	55.907
CIL0909S0031	11.667	13.957	24.643	24.487	34.287	55.87
CIL1235S0012	1.13	2.237	16.527	36.87	50.987	55.847
CIL1032S0005	255.59	293.447	193.85	160.437	125.783	55.803
CIL0651S0001	18.657	19.423	28.743	33.71	35.687	55.713
CIL1246S0118	1698.59	586.187	630.38	317.397	170.15	55.713
CIL1282S0017	7.997	7.183	11.347	19.25	26.317	55.68
CIL0895S0050	38.25	85.88	106.483	96.75	105.003	55.66
CIL1196S0071	25.693	27.463	38.497	38.44	38.58	55.563
CIL0979S0039	34.96	40.59	62.01	69.45	70.653	55.477
CIL0967S0038	19.797	24.507	30.297	32.583	35.99	55.473
CIL0929S0107	3.047	2.703	9.053	11.6	19.99	55.417
CIL1084S0088	24.253	30.997	29.643	32.463	32.743	55.413
CIL0912S0106	18.71	20.413	23.013	28.407	35.1	55.363
CIL1497S0041	14.09	16.047	34.173	43.323	45.283	55.16
CIL1197S0077	27.017	31.703	60.77	56.68	67.117	55.13
CIL1112S0095	5.827	6.89	11.817	16.037	24.607	55.037
CIL1134S0095	15.443	21.79	13.353	19.777	28.17	55.037
CIL0045S0004	32.87	33.903	72.607	69.637	70.32	55.01
CIL1341S0013	21.547	19.463	22.56	25.697	36.377	54.927
CIL0967S0105	17.973	23.213	24.967	35.74	38.19	54.89
CIL1056S0039	25.38	23.68	41.127	43.28	53.97	54.86
CIL1135S0043	8.207	3.963	14.663	13.217	17.893	54.823
CIL1147S0090	150.557	157.907	111.263	88.573	91.957	54.813
CIL1483S0012	9.447	5.607	14.29	23.203	32.41	54.81
CIL1343S0029	25.44	25.053	38.727	42.98	43.193	54.747
CIL1167S0050	21.51	22.747	29.437	30.657	37.833	54.693
CIL1381S0008	23.283	23.923	30.847	37.25	39.67	54.683
CIL1295S0035	26.063	20.093	28.367	40.333	48.223	54.617
CIL1001S0055	1.08	3.56	11.193	17.123	29.36	54.557
CIL0990S0175	201.073	185.353	131.937	79.247	76.357	54.553
CIL1153S0089	13.493	25.283	21.587	18.763	25.393	54.51
CIL1090S0051	23.57	25.837	31.087	32.757	35.303	54.507
CIL1259S0035	3.773	5.833	7.643	14.127	31.867	54.483
CIL1557S0008	28.017	26.69	87.427	73.443	50.22	54.347
CIL0919S0032	12.88	11.627	31.1	29.113	38.443	54.307
CIL1456S0041	0.877	1.177	1.787	4.25	7.92	54.29
CIL1032S0063	0.547	0.787	6.957	19.927	19.383	54.233
CIL1047S0139	20.087	20.027	60.8	65.553	57.057	54.2
CIL1137S0037	13.22	15.96	18.303	23.95	28.617	54.167
CIL1453S0009	3.6	4.387	32.227	59.233	59.753	54.167
CIL1358S0033	20.16	23.153	40.35	45.747	47.867	54.143
CIL1505S0050	25.603	32.04	47.4	43.613	46.29	54.1
CIL1082S0012	5.017	0.757	5.473	24.867	19.17	54.097
CIL1189S0011	18.893	20.007	25.653	32.943	31.807	54.063
CIL0970S0081	2048.77	1562.15	941.337	576.66	451.353	54.01
CIL0909S0025	14.24	17.68	27.793	28.55	35.6	53.97
CIL1050S0076	24.527	26.787	27.313	35.587	41.607	53.943
CIL1082S0079	23.783	22.797	28.13	33.93	36.99	53.887
CIL1578S0027	26.823	35.53	47	48.317	47.017	53.88
CIL0281S0006	20.193	30.643	30.06	36.83	38.74	53.863
CIL0957S0122	8.227	9.57	14.897	21.71	29.357	53.797
CIL1180S0013	18.253	23.117	36.607	42.547	49.84	53.747
CIL1320S0003	18.657	21.813	27.66	37.457	41.623	53.687
CIL1417S0030	37.22	48.767	71.237	76.25	75.587	53.67
CIL1061S0047	41.437	59.64	83.613	73.567	75.27	53.633
CIL0957S0106	18.153	18.557	46.983	38.29	35.717	53.56
CIL1012S0030	23.78	22.097	29.143	34.397	40.793	53.387
CIL1060S0001	12.49	15.34	35.563	34.653	27.44	53.303
CIL1192S0070	1685.58	1921.6	1105.57	608.203	418.303	53.3
CIL1076S0007	0.917	0.5	7.627	21.027	25.317	53.263
CIL1279S0017	26.48	15.943	30.92	46.61	32.277	53.247
CIL0090S0006	19.69	23.037	73.043	60.59	44.19	53.2
CIL1090S0050	16.017	19.697	18.747	15.743	24.943	53.12
CIL0893S0008	23.297	14.377	13.093	16.737	31.077	53.11
CIL1399S0012	19.56	21.663	25.307	54.5	47.477	53.083
CIL1262S0037	11.607	11.883	18.74	84.457	68.787	53.02
CIL1370S0035	511.033	364.237	299.04	318.433	269.657	53.003
CIL0948S0164	5.23	10.75	1.203	218.763	202.943	52.977
CIL1507S0020	7.477	7.93	11.733	15.86	17.81	52.883
CIL1181S0051	24.413	27.473	32.777	33.903	36.453	52.78
CIL0902S0006	836.723	710.103	471.21	365.283	306.557	52.763
CIL0893S0173	6.203	4.46	25.447	17.937	11.58	52.76
CIL0984S0086	9.8	11.777	21.72	20.61	26.553	52.7
CIL1611S0017	0.58	1.12	4.85	14.203	25.057	52.627
CIL0407S0004	15.863	22.5	33.793	50.863	46.29	52.56
CIL1268S0043	21.983	17.58	30.07	48.02	43.043	52.537
CIL1411S0014	6.507	9.447	43.567	44.12	45.433	52.513
CIL1087S0031	0.89	1.617	1.27	3.457	9.97	52.473
CIL1467S0026	14.06	16.623	26.96	33.103	35.22	52.427
CIL1443S0022	0.067	0.417	2.287	3.303	16.117	52.327
CIL1185S0016	111.943	98.903	104.313	103.66	101.167	52.297
CIL0151S0009	220.397	162.907	145.52	109.95	83.373	52.283
CIL1063S0048	112.613	135.833	126.08	110.357	96.6	52.263
CIL1061S0080	2.61	2.937	1.527	0.503	2.11	52.233
CIL0906S0159	61.94	40.277	41.55	30.547	33.47	52.227
CIL1348S0034	14.933	13.933	22.82	28.75	34.937	52.213
CIL0607S0001	2.187	0.81	0.58	36.99	23.77	52.2
CIL1417S0075	25.183	25.43	46.23	52.143	45.837	52.183
CIL0893S0299	6.45	6.283	11.51	16.163	19.237	52.18
CIL1383S0027	12.637	17.383	23.977	31.187	35.357	52.167
CIL0908S0044	6.093	10.563	12.167	26.103	36.857	52.153
CIL1009S0040	33.527	35.307	58.557	83.123	70.43	52.147
CIL1207S0033	11.527	11.327	17.803	19.697	25.747	52.13
CIL1387S0014	27.543	24	35.34	49.38	56.123	52.087
CIL1094S0022	14.23	17.917	21.517	23.95	26.24	52.083
CIL1619S0022	51.337	43.62	123.02	94.597	83.53	52.037
CIL0215S0020	7.337	7.807	7.903	15.987	23.417	52.03
CIL0902S0126	3.46	4.043	16.997	18.767	22.6	52.023
CIL1053S0048	1.543	2.057	5.743	11.793	19.023	51.973
CIL1021S0064	0.663	0.52	37.453	38.577	25.96	51.943
CIL1248S0021	0.177	1.433	4.697	10.05	26.03	51.943
CIL1096S0041	18.777	21.05	29.57	33.863	39.047	51.897
CIL1482S0040	291.53	213.247	170.053	158.06	146.333	51.893
CIL1424S0013	3.223	3.66	14.53	19.497	22.133	51.79
CIL1246S0081	2.423	2.823	12.137	32.593	35.45	51.733
CIL1384S0028	12.71	14.51	31.597	42.58	45.217	51.717
CIL1010S0001	22.6	46.52	48.303	82.32	78.823	51.667
CIL1431S0015	14.04	18.743	22.84	24.86	27.243	51.61
CIL1417S0019	17.687	18.97	26.367	30.51	37.207	51.533
CIL1149S0069	42.16	35.793	59.66	82.357	88.777	51.473
CIL1018S0013	11.933	11.88	20.92	22.897	28.367	51.44
CIL0990S0142	5.147	8.207	15.88	23.677	33.313	51.42
CIL0239S0004	10.183	35.767	77.733	94.143	115.22	51.33
CIL0247S0009	5.87	13.08	133.143	71.973	82.797	51.223
CIL1034S0083	23.177	28.377	45.883	42.56	47.123	51.17
CIL0976S0070	9.503	11.28	34.45	52.793	50.827	51.167
CIL0987S0132	0.553	1.933	18.647	39.54	41.48	51.15
CIL1048S0074	7.273	7.073	21.947	24.54	33.053	51.123
CIL0622S0001	0.333	0.637	0.937	1.787	12.143	51.087
CIL1429S0013	10	22.1	24.77	31.65	39.873	51.063
CIL1240S0026	13.49	16.553	20.443	27.653	33.017	51.057
CIL0319S0006	575.583	499.643	330.867	272.787	245.01	51.013
CIL0021S0002	4.303	2.71	27.453	32.69	20.223	50.987
CIL0263S0004	18.587	18.493	27.737	32.423	39.293	50.983
CIL0030S0013	0.273	1.357	4.06	24.643	29.287	50.92
CIL1229S0036	5.22	7.74	20.137	27.147	38.827	50.913
CIL0987S0097	1.267	3.733	5.38	9.177	22.333	50.907
CIL0976S0078	0.25	0.827	1.453	3.753	9.613	50.873
CIL1066S0058	123.917	103.287	83.94	66.017	64.46	50.823
CIL0202S0005	16.803	24.377	43.623	45.497	39.76	50.82
CIL0937S0111	8.87	10.347	16.523	21.073	27.95	50.763
CIL1158S0067	12.34	22.32	12.443	17.787	24.697	50.7
CIL0010S0013	12.143	14.93	23.493	31.313	35.94	50.683
CIL1189S0010	18.12	23.917	25.663	30.727	31.323	50.647
CIL1100S0114	169.4	138.48	138.873	134.96	126.887	50.587
CIL1358S0008	21.987	26.987	63.717	45.307	39.533	50.53
CIL1068S0058	17.44	18.513	40.283	46.59	54.2	50.527
CIL0272S0009	2.327	1.97	2.613	6.16	11.45	50.47
CIL1060S0058	20.59	19.91	34.897	33.893	37.123	50.453
CIL1575S0016	17.05	22.347	27.677	30.65	34.103	50.433
CIL1528S0008	110.15	135.57	130.503	84.067	81.3	50.427
CIL1196S0008	8.273	5.34	13.933	32.55	48.92	50.357
CIL1040S0079	20.46	22.403	25.193	28.307	30.433	50.327
CIL1107S0054	1.527	1.507	4.373	10.317	20.117	50.177
CIL1094S0074	10.743	13.967	17.077	26.813	30.613	50.123
CIL1048S0042	15.957	18.317	22.97	26.45	32.84	50.07
CIL1053S0047	0.08	0.187	0.573	3.337	12.15	49.94
CIL0938S0052	18.733	21.22	27.96	34.853	37.283	49.92
CIL1099S0058	251.69	223.473	128.153	139.543	111.737	49.9
CIL0893S0155	138.333	97.807	209.647	116.873	60.127	49.863
CIL1196S0069	1328.66	1333.79	744.19	479.46	353.333	49.817
CIL1454S0024	1606.02	1222.48	641.873	382.69	328	49.81
CIL1495S0042	18.08	26.39	24.917	31.98	38.77	49.8
CIL1259S0052	12.86	9.487	14.183	11.86	21.133	49.71
CIL1613S0017	27.97	23.6	55.483	68.34	64.64	49.637
CIL1018S0070	14.947	13.517	15.883	13.683	16.357	49.627
CIL1154S0076	415.197	288.07	326.043	159.873	64.913	49.62
CIL1175S0078	8.04	14.05	25.193	24.28	32.037	49.59
CIL0992S0009	176.81	152.967	123.933	156.507	141.997	49.583
CIL0923S0183	19.017	13.92	37.753	36.423	47.277	49.577
CIL1492S0011	20.483	21.597	26.32	28.347	35.38	49.573
CIL0982S0017	42.073	45.577	92.047	89.42	92.27	49.57
CIL1401S0033	6.623	5.383	39.267	41.82	27.387	49.5
CIL0978S0025	24.117	32.457	37.773	46.407	45.123	49.49
CIL1030S0078	24.397	28.12	33.42	39.497	41.35	49.49
CIL0407S0002	13.437	20.103	27.043	40.873	43.63	49.43
CIL1235S0016	5.22	13.387	35.647	66.527	61.26	49.403
CIL0923S0070	148.71	149.013	121.75	98.057	98.26	49.38
CIL1087S0081	3.687	2.917	5.073	10.813	15.4	49.34
CIL1084S0026	9.1	10.343	24.99	23.25	31.653	49.32
CIL0953S0107	9.583	9.8	10.703	14.733	22.307	49.31
CIL0940S0115	22.027	21.16	31.703	39.843	46.017	49.243
CIL0628S0007	17.98	20.267	27.437	28.6	34.45	49.197
CIL1082S0024	14.023	16.997	34.873	39.3	44.627	49.133
CIL1064S0063	7.243	8.793	7.837	12.777	21.32	49.11
CIL1118S0015	190.137	173.903	116.707	120.293	99.803	49.11
CIL1144S0029	8.163	13.647	40.087	35.103	25.253	49.097
CIL1030S0150	184.823	192.047	181.56	128.583	108.863	49.083
CIL1173S0027	14.43	17.243	25.557	27.103	33.833	48.983
CIL1280S0017	1074.64	1005.96	673.003	452.79	391.76	48.947
CIL0922S0023	904.493	662.693	429.647	331.647	309.793	48.9
CIL0914S0114	9.65	13.117	14.217	16.663	20.987	48.887
CIL0495S0002	21.537	15.383	17.57	39.04	54.113	48.807
CIL1030S0109	11.103	10.453	11.37	24.76	31.957	48.763
CIL1446S0066	6.07	8.53	55.503	45.467	28.487	48.727
CIL1197S0060	12.083	13.787	25.987	27.51	38.9	48.607
CIL0938S0123	14.903	25.553	23.147	37.943	38.39	48.58
CIL1122S0097	118.423	95.29	89.3	84.633	78.037	48.54
CIL1133S0063	0.557	2.153	14.107	32.907	32.5	48.537
CIL1465S0012	11.753	13.57	20.133	22.693	28.793	48.513
CIL1508S0039	31.797	35.067	56.087	64.38	60.72	48.503
CIL1603S0012	22.71	26.463	37.48	43.217	42.493	48.383
CIL1264S0007	3.457	3.903	13.52	12.447	21.147	48.343
CIL1076S0115	97.42	94.657	76.197	81.777	86.49	48.317
CIL1341S0025	313.65	285.507	239.533	183.683	179.31	48.317
CIL1156S0034	22.987	27.843	39.737	47.71	53.22	48.293
CIL1375S0035	20.153	21.89	27.717	34.547	44.693	48.273
CIL1554S0020	2.95	2.813	10.213	13.803	20.85	48.27
CIL1094S0087	197.997	292.11	177.253	139.183	137.753	48.25
CIL1333S0019	105.183	114.603	55.59	70.24	55.767	48.157
CIL1205S0043	17.823	21.677	30.35	31.703	34.537	48.137
CIL0207S0012	5.99	9.503	18.16	32.75	31.613	48.123
CIL1078S0070	20.523	25.467	22.557	22.537	26.99	48.043
CIL0202S0003	15.143	14.867	14.65	24.053	30.873	48.013
CIL1568S0010	5.33	5.717	13.363	18.997	31.513	48.013
CIL1565S0022	21.58	15.65	21.45	28.24	25.367	47.9
CIL1031S0109	45.963	44.04	96.29	90.683	85.15	47.867
CIL0967S0046	19.013	8.947	22.72	21.273	23.01	47.78
CIL0937S0025	20.423	27.48	30.98	30.88	41.093	47.713
CIL0344S0009	10.36	9.347	19.837	25.403	24.753	47.65
CIL1086S0026	1.057	1.457	23.99	39.347	51.737	47.45
CIL0945S0081	6.053	7.433	26.317	35.157	31.127	47.327
CIL1393S0047	14.583	27.823	26.657	31.927	31.927	47.317
CIL1405S0035	6.317	7.01	14.257	19.647	30.62	47.29
CIL0160S0008	103.657	103.277	101.553	80.063	75.953	47.203
CIL1134S0057	11.367	13.647	18.527	25.69	32.593	47.123
CIL0970S0025	17.877	21.213	24.037	32.31	35.107	47.12
CIL0893S0147	400.197	354.193	197.667	175.297	169.82	47.08
CIL0026S0017	413	289.22	140.95	120.917	67.55	47.043
CIL0902S0148	2.557	7.297	49.817	32.843	19.943	47.04
CIL1002S0064	152.413	177.913	132.757	107.237	91.907	47.037
CIL1508S0031	22.28	21.54	32.767	36.683	40.347	47.03
CIL1277S0073	170.987	191.447	169.633	122.68	114.113	46.993
CIL0538S0004	26.42	23.247	58.397	37.55	37.827	46.957
CIL1348S0064	74.987	94.793	163.25	150.403	162.193	46.933
CIL1158S0078	13.857	17.43	31.07	34.397	44.287	46.917
CIL1454S0010	21.293	24.567	29.963	29.69	32.783	46.917
CIL0059S0007	18.537	17.817	29.44	32.3	35.537	46.887
CIL0945S0123	1.337	1.693	39.533	79.063	86.23	46.853
CIL1084S0021	0.387	1.387	8.26	14.363	14.847	46.823
CIL1464S0001	17.747	15.857	26.493	29.713	35.573	46.793
CIL1196S0084	1.843	4.257	10.38	33.96	49.463	46.79
CIL1015S0051	8.997	17.483	27.753	55.7	45.35	46.74
CIL1101S0032	31.09	37.337	52.767	101.093	97.577	46.7
CIL0929S0096	14.337	6.28	28.393	41.14	61.1	46.633
CIL1090S0061	5.793	6.437	46.993	35.75	17.453	46.577
CIL0344S0023	88.997	81.943	13.423	62.187	68.147	46.57
CIL0914S0072	98.423	82.083	71.013	82.22	77.88	46.543
CIL1194S0050	1.543	1.837	5.063	8.94	12.05	46.507
CIL1235S0061	0.167	1.943	2.013	2.663	15.273	46.47
CIL1315S0013	1.077	1.04	2.163	6.393	12.143	46.447
CIL1145S0022	257.757	211.573	169.617	148.843	142.063	46.41
CIL1386S0032	1.567	1.21	2.157	5.44	12.173	46.277
CIL1099S0044	23.95	77.48	44.537	148.347	80.427	46.27
CIL1173S0019	113.867	128.533	91.38	108.843	99.967	46.257
CIL0937S0150	8.4	11.38	43.46	29.023	22.003	46.253
CIL1313S0023	20.107	22.64	30.197	35.173	35.153	46.213
CIL1578S0017	22.4	20.19	28.977	33.57	39.957	46.17
CIL1101S0026	12.16	34.227	55.653	222.85	211.81	46.15
CIL1393S0042	13.6	17.28	26.93	29.74	30.983	46.147
CIL0990S0054	1.417	1.373	10.493	24.917	55.65	46.097
CIL0923S0143	21.273	21.06	34.72	39.383	38.27	46.077
CIL0390S0001	0.51	1.09	5.853	19.347	29.993	46.06
CIL1409S0029	1791.8	1382.2	753.717	493.907	441.53	46.04
CIL1048S0044	25.887	24.07	42.327	52.847	56.973	46.013
CIL0897S0104	17.08	19.747	28.813	31.733	36.94	45.903
CIL1196S0079	21.63	21.727	25.737	33.703	30.417	45.88
CIL1383S0002	20.703	29.23	30.007	27.29	24.607	45.857
CIL1138S0029	15.013	17.96	93.753	104.783	87.467	45.85
CIL0998S0001	12.037	16.27	18.973	30.28	43.623	45.8
CIL0993S0064	0.33	0.69	0.713	1.017	5.393	45.747
CIL0090S0033	22.997	28.777	44.073	49.977	60.99	45.703
CIL0450S0008	9.13	9.54	17.7	23.223	29.123	45.663
CIL0914S0051	16.73	48.517	10.35	7.023	10.627	45.657
CIL1446S0067	5.333	6.37	47.55	39.087	26.097	45.64
CIL1082S0102	20.463	26.763	28.46	34.25	33.71	45.62
CIL1034S0030	143.207	203.867	117.257	103.117	82.617	45.543
CIL1040S0031	110.447	75.743	122.003	91.377	84.093	45.517
CIL1207S0064	37.897	87.07	82.96	57.247	59.993	45.49
CIL1429S0023	10.45	10.55	17.15	21.483	28.307	45.467
CIL1264S0069	278.67	194.843	132.797	115.85	86.087	45.453
CIL1114S0069	27.5	54.027	66.547	65.55	56.73	45.447
CIL0945S0029	7.767	10.347	43.77	37.88	41.393	45.403
CIL0935S0118	22	18.757	15	18.513	27.293	45.317
CIL1417S0082	2.237	1.89	5.727	10.913	23.6	45.31
CIL1420S0011	18.4	21.35	24.12	31.38	28.927	45.287
CIL1433S0014	16.377	18.257	24.93	25.207	28.747	45.277
CIL1367S0014	0.107	0.69	18.107	23.45	20.59	45.15
CIL0135S0009	7.747	10.56	26.587	33.45	23.61	45.143
CIL1456S0035	18.5	19.92	36.077	31.29	32.183	45.11
CIL0122S0007	35.543	59.813	75.28	61	49.73	45.053
CIL0906S0038	4.573	4.81	9.533	9.27	15.507	45.053
CIL1157S0022	17.943	18.877	16.76	24.403	31.483	44.92
CIL1003S0116	15.43	18.29	23.107	27.977	33.12	44.903
CIL0990S0039	17.7	19.543	23.523	27.907	34.403	44.86
CIL1060S0021	0.36	0.52	5.647	11.727	19.063	44.843
CIL1101S0094	20.36	21.69	25.453	25.187	24.153	44.817
CIL1037S0090	41.88	48.527	84.527	66.957	60.607	44.783
CIL1128S0055	10.703	13.03	20.037	32.933	40.71	44.78
CIL0893S0175	44.02	40.793	91.993	118.59	101.513	44.767
CIL0218S0004	175.727	391.977	241.333	193.413	272.207	44.75
CIL1099S0051	14.29	25.53	18.157	31.563	40.47	44.723
CIL1246S0108	20.237	19.46	32.837	41.113	46.017	44.71
CIL1256S0064	89.53	75.827	45.383	44.247	46.097	44.687
CIL1385S0004	0.05	0.093	6.427	17.47	31.453	44.667
CIL1264S0013	202.277	184.17	130.057	120.577	102.47	44.663
CIL1317S0030	9.867	11.1	22.53	26.003	31.077	44.64
CIL1239S0050	18.417	21.567	24.723	26.51	30.123	44.627
CIL0945S0049	1.127	0.873	8.023	20.04	15.223	44.623
CIL1031S0088	2.65	2.19	25.687	42.703	34.317	44.587
CIL1541S0004	331.693	283.177	218.27	175.703	167.6	44.51
CIL1235S0046	14.79	12.143	48.78	47.117	39.743	44.46
CIL0140S0007	18.843	17.76	23.763	22.383	26.577	44.44
CIL1306S0008	113.857	113.987	108.457	77.577	62.157	44.383
CIL0979S0002	10.117	8.94	8.53	25.34	28.417	44.24
CIL1324S0042	33.01	53.69	229.23	162.353	201.153	44.223
CIL1607S0026	18.333	23.043	31.763	37.12	38.023	44.223
CIL1038S0004	16.01	18.907	29.11	37.14	39.803	44.127
CIL0324S0016	19.59	22.107	23.527	34.087	35.04	44.093
CIL1568S0033	19.393	12.993	19	23.587	24.72	44.087
CIL0967S0130	6.11	7.063	41.27	35.117	36.91	44.053
CIL0987S0075	18.903	18.89	35.363	32.053	31.43	43.997
CIL1098S0034	21.71	19.103	26.32	26.643	29.14	43.963
CIL1505S0052	14.067	19.383	21.26	23.283	26.267	43.903
CIL1138S0092	18.687	25.017	35.47	41.2	51.847	43.803
CIL0259S0008	93.78	108.6	101.657	92.533	81.59	43.727
CIL1462S0014	124.043	162.16	116.893	92.783	87.113	43.723
CIL0895S0136	4.793	6.25	8.24	10.687	20.603	43.693
CIL1239S0051	10.237	13.093	20.273	20.473	22.683	43.69
CIL1226S0053	6.71	9.58	18.87	39.273	35.34	43.68
CIL1325S0071	0.133	0.353	0.777	3.857	9.27	43.597
CIL0922S0101	14.403	20.11	39.893	35.303	42.153	43.533
CIL0957S0020	7.747	7.337	10.587	13.21	19.107	43.53
CIL0100S0008	14.337	16.79	25.75	31.923	36.15	43.447
CIL1037S0103	25.5	24.767	59.393	55.863	47.2	43.343
CIL1166S0015	1.997	3.357	5.04	6.727	10.85	43.323
CIL1147S0068	1.36	2.303	27.24	31.233	34.573	43.307
CIL1363S0025	8.747	11.51	11.513	14.703	19.077	43.223
CIL0938S0035	20.847	26.883	39.7	38.153	40.35	43.137
CIL0150S0008	0.153	0.343	98.053	108.233	19.357	43.133
CIL0937S0097	12.183	12.183	95.41	113.983	121.287	43.103
CIL1166S0028	1117.63	867.927	461.097	345.183	323.78	43.093
CIL0987S0101	20.353	28.73	29.933	31.427	36.46	43.09
CIL1584S0030	102.187	131.373	124.773	91.477	71.87	43.05
CIL1113S0049	0.283	0.68	1.213	4.237	10.627	43.047
CIL1400S0026	17.727	16.717	23.07	28.507	31.977	43.047
CIL0893S0363	0.34	0.427	3.227	4.363	9.22	42.983
CIL0914S0022	15.057	15.31	24.74	29.813	32.413	42.977
CIL0009S0020	20.15	21.447	24.86	33.537	38.79	42.953
CIL1237S0005	20.76	22.277	23.987	30.173	33.39	42.92
CIL1276S0031	14.593	15.483	31.083	37.157	46.027	42.88
CIL0989S0071	16.917	19.97	17.88	28.753	31.687	42.87
CIL1050S0067	21.007	30.05	37.403	44.9	43.797	42.857
CIL1118S0046	4325.12	2366.75	2082.99	1188.93	795.76	42.82
CIL1224S0008	6.097	8.63	37.637	34.753	43.013	42.813
CIL0908S0052	18.293	12.813	28.663	47.95	63.33	42.81
CIL0203S0021	21.883	29.337	44.08	48.553	52.157	42.797
CIL0338S0022	107.45	199	103.483	78.997	58.213	42.793
CIL0978S0185	15.39	14.757	14.717	20.763	27.06	42.787
CIL1259S0084	0.067	0.197	0.587	0.647	5.743	42.77
CIL1169S0034	18.043	17.797	23.327	28.337	31.56	42.727
CIL0010S0003	3.897	4.293	11.05	9.703	13.013	42.693
CIL1037S0038	6.7	9.793	9.14	7.043	14.937	42.68
CIL0001S0043	143.507	172.37	126.68	91.63	73.627	42.607
CIL0953S0030	164.283	127.48	101.833	100.79	101.733	42.57
CIL1383S0003	7.693	9.38	11.04	26.907	27.9	42.54
CIL1083S0024	901.063	555.6	426.473	294.233	289.403	42.533
CIL0937S0061	313.13	229.057	199.483	181.2	189.72	42.483
CIL0942S0198	798.59	785.69	503.163	307.487	234.257	42.47
CIL1306S0031	3.763	5.643	6.703	26.213	34.707	42.463
CIL1038S0117	16.217	18.57	23.497	28.093	30.293	42.46
CIL0041S0006	153.913	204.193	134.57	122.637	110.397	42.43
CIL1061S0073	19.077	22.93	26.283	26.167	26.297	42.397
CIL1224S0029	18.283	22.39	34.073	31.453	35.903	42.35
CIL1032S0095	19.957	23.603	28.403	30.827	34.017	42.317
CIL1107S0015	23.48	9.807	23.243	63.01	72.537	42.28
CIL0970S0133	6.22	5.707	9.067	18.86	23.243	42.273
CIL1029S0036	15.533	13.913	55.227	28.28	30.223	42.247
CIL1547S0013	15.503	19.073	17.457	37.16	40.623	42.243
CIL1308S0018	5.903	6.677	15.74	19.593	19.47	42.237
CIL0970S0116	2.777	1.9	9.137	8.75	16.193	42.213
CIL0979S0056	8.603	8.187	9.863	10.047	14.537	42.207
CIL1025S0122	8.773	12.133	13.467	14.737	24.107	42.203
CIL0937S0067	17.97	23.847	28.79	32.073	31.91	42.193
CIL1078S0057	96.41	96.603	80.54	78.61	70.89	42.16
CIL1219S0067	13.24	17.293	47.033	60.737	47.853	42.14
CIL1107S0034	20.507	28.763	36.973	38.053	33.387	42.133
CIL0929S0156	630.023	636.447	447.257	304.497	267.73	42.093
CIL1112S0070	7.91	8.47	14.453	16.563	19.337	42.087
CIL1155S0058	13.667	12.363	20.557	26.21	29.29	42.057
CIL0970S0160	12.103	16.487	22.953	25.67	32.023	42.01
CIL1012S0018	2.647	6.38	21.403	35.13	47.613	42.003
CIL1071S0104	2.397	7.183	19.277	20.51	36.503	41.997
CIL0914S0157	9.41	13.457	24.1	25.78	23.65	41.94
CIL0922S0192	19.1	20.64	22.837	27.4	25.683	41.93
CIL0978S0020	11.717	18.19	27.76	38.083	36.8	41.927
CIL1390S0043	11.89	12.837	14.287	16.383	20.303	41.857
CIL1446S0003	453.853	302.557	210.46	152.59	164.117	41.85
CIL1520S0046	11.817	16.19	29.007	33.883	38.117	41.85
CIL0188S0006	12.927	21.71	23.04	22	24.903	41.84
CIL0310S0015	1.547	3.03	17.837	17.977	29.347	41.75
CIL1048S0075	17.213	21.907	27.747	25.007	29.677	41.727
CIL0909S0026	10.48	12.473	20.813	19.747	25	41.72
CIL1293S0059	11.417	12.757	19.423	19.45	23.487	41.693
CIL1182S0022	1.957	3.243	4.557	10.307	17.783	41.69
CIL0580S0001	0.493	0.587	22.037	26.93	44.023	41.653
CIL0937S0020	86.167	137.71	114.807	78.577	70.823	41.653
CIL1336S0047	359.37	291.533	265.747	193	150.083	41.65
CIL0972S0091	10.267	11.347	14.65	18.467	20.913	41.627
CIL0942S0221	16.78	16.38	21.993	29.65	30.2	41.57
CIL1135S0048	15.12	22.933	31.13	34.143	31.887	41.533
CIL0393S0001	14.697	13.037	3.467	17.66	18.103	41.487
CIL0906S0124	8.58	16.857	8.763	19.507	21.293	41.463
CIL0982S0008	159.533	198.817	91.15	123.137	116.467	41.433
CIL1315S0027	27.737	38.937	57.93	62.32	61.013	41.38
CIL1216S0043	979.573	875.267	463.447	301.697	264.867	41.207
CIL1222S0067	1.287	2.107	11.343	83.833	96.077	41.193
CIL0130S0011	214.223	202.393	173.29	145.093	125.38	41.077
CIL1102S0071	92.123	112.437	80.95	68.597	65.12	41.013
CIL0917S0064	14.51	26.43	35.813	30.643	30.903	40.983
CIL1342S0047	8.35	16.21	43.7	68.91	69.517	40.94
CIL0908S0127	0.767	1.09	4.147	6.597	17.143	40.86
CIL1154S0035	10.127	22.157	36.257	30.003	32.343	40.807
CIL1050S0078	7.23	6.88	14.357	20.963	25.29	40.763
CIL0902S0096	19.413	20.64	26.833	29.707	35.127	40.73
CIL0402S0001	10.617	5.763	93.313	88.113	113.133	40.723
CIL0921S0022	2.213	1.88	1.61	1.753	5.273	40.707
CIL0912S0083	3.347	9.097	25.973	80.037	97.483	40.613
CIL1086S0063	4.193	4.507	20.187	27.933	21.387	40.603
CIL0272S0010	18.733	23.9	44.037	42.953	40.173	40.55
CIL0514S0005	15.1	20.347	21.167	22.63	28.53	40.497
CIL1215S0032	14.393	13.41	19.617	25.153	30.143	40.42
CIL0902S0134	11.71	20.18	7.017	23.653	28.66	40.387
CIL1323S0033	321.01	247.263	192.51	180.963	182.16	40.377
CIL1361S0020	17.703	27.89	26.51	26.46	27.903	40.373
CIL1133S0025	16.823	16.84	25.673	31.563	38.1	40.35
CIL1500S0051	12.603	11.103	18.163	23.897	29.557	40.253
CIL0940S0198	0.773	3.11	9.493	13.217	20.843	40.223
CIL1126S0101	17.037	14.313	15.947	19.643	25.033	40.213
CIL1486S0049	90.523	93.817	57.303	50.657	45.757	40.2
CIL0106S0013	218.63	143.01	131.103	134.603	115.72	40.15
CIL1060S0073	13.35	15.22	29.907	26.583	28.107	40.113
CIL0929S0075	80.643	24.477	23.363	30.5	42.307	40.103
CIL1354S0046	1.497	1.79	20.06	24.75	36.787	40.04
CIL0923S0098	17.167	25.777	34.07	42.857	36.74	39.983
CIL1021S0079	13.65	9.113	16.807	21.483	31.93	39.943
CIL1492S0036	16.053	14.88	23.74	35.083	33.717	39.903
CIL1147S0035	137.23	95.757	93.473	97.997	81.153	39.873
CIL1515S0046	26.54	30.343	59.017	52.787	44.423	39.863
CIL1102S0101	38.223	37.99	91.56	82.427	73.903	39.843
CIL0050S0003	134.23	65.123	41.397	75.25	87.463	39.82
CIL0145S0007	15.497	16.873	32.89	31.407	28.997	39.793
CIL1078S0011	16.633	27.667	21.253	21.473	24.85	39.77
CIL0942S0097	11.553	4.917	7.703	9.123	11.903	39.717
CIL1500S0029	6.077	4.947	7.767	12.437	19.26	39.693
CIL1060S0037	12.583	14.837	14.067	17.06	20.337	39.687
CIL0951S0107	5.947	5.227	15.147	15.763	21.557	39.633
CIL1263S0091	9.037	11.553	16.317	31.12	39.087	39.57
CIL1000S0001	0.957	2.713	8.523	17.38	28.367	39.543
CIL0942S0174	31.197	38.017	60.877	70.82	73.227	39.507
CIL0972S0125	152.143	122.073	127.14	107.277	88.693	39.497
CIL0967S0001	23.8	30.073	62.267	47.617	50.61	39.487
CIL1263S0084	101.833	121.257	104.1	80.09	71.723	39.463
CIL1055S0113	13.377	16.333	24.857	28.497	36.157	39.403
CIL1304S0038	11.773	11.677	28.01	36.467	42.163	39.35
CIL1095S0040	5.81	6.66	23.763	24.703	24.157	39.303
CIL1246S0067	17.807	22.077	28.61	37.047	43.767	39.233
CIL1034S0072	727.217	608.967	318.527	236.683	195.997	39.22
CIL1519S0002	19.157	31.287	124.377	101.587	82.67	39.187
CIL1032S0035	18.117	21.41	18	19.783	22.513	39.17
CIL1133S0026	744.71	592.42	469.807	304.98	250.877	39.137
CIL1034S0062	10.343	11.85	26.483	29.943	37.82	39.067
CIL1385S0030	8.74	8.88	16.393	19.81	26.247	39.013
CIL1021S0108	0.737	0.967	6.943	4.01	11.683	39.007
CIL1158S0008	13.233	16.38	41.98	38.35	30.457	38.96
CIL0902S0184	9.547	10.257	14.557	21.683	27.89	38.913
CIL1015S0093	18.253	17.54	31.1	31.803	33.287	38.903
CIL0906S0123	8.247	16.037	9.797	19.507	22.8	38.893
CIL0972S0021	16.933	18.72	24.273	24.18	28.113	38.88
CIL1180S0016	88.97	95.327	78.063	72.723	81.753	38.867
CIL0893S0234	16.757	18.177	23.823	32.057	35.19	38.86
CIL0982S0109	19.303	21	28.83	33.533	35.16	38.847
CIL1515S0035	14.03	16.027	18.007	15.823	19.557	38.847
CIL1028S0072	96	100.673	94.12	85.117	67.277	38.82
CIL1122S0041	12.763	21.683	27.22	23.967	22.12	38.75
CIL0895S0165	12.92	14.97	18.387	18.443	21.207	38.583
CIL1037S0013	19.943	13.6	30.557	58.33	39.147	38.57
CIL1196S0089	5.89	7.403	28.673	36.76	36.19	38.567
CIL1131S0065	17.003	19.487	23.817	25.82	29.92	38.547
CIL0914S0133	6.67	7.73	15.417	17.133	17.573	38.537
CIL1164S0030	12.313	14.937	18.727	22.263	25.447	38.537
CIL1215S0053	77.07	95.227	71.19	63.573	52.843	38.513
CIL1321S0011	18.317	19.44	28.283	37.54	48.323	38.513
CIL0921S0141	0.187	0.307	3.817	17.87	28.03	38.487
CIL1477S0021	1.467	1.53	4.723	11.503	17.75	38.483
CIL0045S0015	21.43	23.793	34.86	37.123	42.93	38.363
CIL1099S0039	1657.61	1602.39	796.593	411.68	274.18	38.36
CIL1032S0068	17.803	20.203	26.007	27.107	30.343	38.357
CIL1165S0022	13.43	15.447	19.283	30.71	36.34	38.353
CIL1187S0073	5.613	6.327	10.65	17.45	22.8	38.34
CIL1326S0021	14.48	17.677	33.107	46.93	59.533	38.32
CIL1226S0039	18.077	28.54	28.177	35.347	31.383	38.3
CIL0064S0025	3.907	2.563	3.637	6.533	15.517	38.253
CIL1114S0034	0.44	0.123	2.65	15.3	33.617	38.22
CIL0145S0008	1.557	0.66	5.81	15.023	18.477	38.213
CIL1266S0004	5.967	9.137	24.917	41.603	28.93	38.213
CIL1131S0068	5.13	5.953	10.19	14.447	18.977	38.197
CIL0923S0129	6.873	8.727	13.867	15.217	16.22	38.163
CIL1346S0021	7.95	6.507	6.837	23.82	28.573	38.143
CIL1021S0003	11.297	11.183	21.933	21.53	25.09	38.103
CIL1229S0020	17.46	18.34	16.073	24.213	26.317	38.09
CIL1619S0001	10.857	12.11	16.037	18.71	27.653	38.09
CIL0146S0008	16.17	20.543	29.777	28.13	31.177	38.083
CIL1226S0054	0.613	1.267	2.69	14.477	18.28	38.08
CIL1300S0069	154.12	174.647	122.093	87.57	64.13	38.05
CIL1372S0041	18.313	20.6	26.22	26.087	28.663	37.99
CIL1207S0022	127.71	87.64	62.393	81.35	83.84	37.967
CIL0243S0012	19.75	20.393	65.257	48.08	31.71	37.963
CIL1295S0032	9.9	10.153	13.49	16.72	18.457	37.93
CIL0974S0072	13.243	12.873	22.733	23.667	24.59	37.873
CIL1310S0035	17.597	22.77	23.647	24.043	26.403	37.86
CIL1184S0048	0.92	3.287	5.373	12.817	20.093	37.827
CIL1092S0041	10.093	9.083	24.007	24.197	25.047	37.823
CIL1320S0019	0.183	0.03	0.303	1.86	9.747	37.81
CIL1087S0041	17.037	21.357	26.477	38.137	38.337	37.793
CIL0207S0002	9.813	8.09	10.203	10.627	15.337	37.74
CIL1507S0008	11.2	10.637	12.167	17.023	19.94	37.74
CIL1189S0060	90.27	126.277	191.51	162.577	113.213	37.727
CIL1031S0039	6.32	6.52	11.393	12.497	15.05	37.72
CIL0923S0208	13.21	13.693	19.39	22.053	25.957	37.657
CIL1081S0062	13.76	9.227	15.063	16.37	15.347	37.63
CIL1106S0044	13.247	18.313	31.78	42.547	42.747	37.623
CIL1040S0067	1.803	2.36	5.097	7.063	13.53	37.617
CIL1317S0040	6.63	5.66	9.64	18.723	21.773	37.56
CIL0917S0079	0.047	0.183	2.247	5.343	15.15	37.527
CIL1128S0025	7.187	5.257	12.993	13.09	16.953	37.523
CIL1152S0070	13.4	13.327	16.263	21.433	24.837	37.52
CIL0922S0072	81.87	115.517	97.91	63.107	58.73	37.493
CIL1199S0002	94.227	107.01	145.303	115.923	99.617	37.483
CIL1032S0134	16.543	16.313	27.4	32.64	31.977	37.47
CIL1084S0056	7.063	11.647	6.57	10.42	19.367	37.463
CIL0938S0084	12.413	14.607	18.327	21.133	23.947	37.453
CIL1003S0054	15.123	16.927	18.363	19.41	24.107	37.44
CIL1555S0023	17.93	20.883	21.117	29.697	34.307	37.397
CIL1086S0047	7.177	4.623	11.637	11.92	13.467	37.353
CIL1082S0133	14.487	17.127	27.56	27.613	28.81	37.35
CIL1325S0054	16.063	17.503	38.733	37.373	31.88	37.333
CIL0895S0218	6.11	11.653	21.22	30.937	39.823	37.267
CIL0967S0080	24.903	27.843	55.16	55.283	42.267	37.257
CIL1032S0062	1.53	1.823	4.103	5.873	14.837	37.237
CIL1104S0036	16.47	10.09	35.707	36.623	30.943	37.233
CIL0225S0017	9.413	10.727	15.403	17.117	22.653	37.2
CIL1032S0067	13.057	12.267	25.067	27.647	26.603	37.183
CIL1134S0026	17.537	16.57	27.35	24.497	25.78	37.157
CIL0271S0007	14.157	14.887	17.253	21.75	23.71	37.133
CIL0957S0173	10.643	11.56	16.67	19.59	23.727	37.133
CIL1466S0021	0.247	1.097	2.33	17.183	30.547	37.097
CIL1482S0042	168.12	236.863	179.783	135.687	124.033	37.097
CIL0923S0141	12.383	12.517	18.91	19.113	21.02	37.08
CIL0037S0023	104.207	129.473	103.433	69.42	55.653	37.047
CIL0895S0107	18.427	20.603	44.973	38.673	30.213	37.023
CIL1235S0055	83.333	81.103	95.587	99.57	96.58	36.983
CIL1156S0014	84.593	65.957	71.8	65.837	65.467	36.98
CIL1066S0068	12.773	15.667	19.76	20.907	22.813	36.973
CIL1330S0037	203.65	182.147	154.22	128.293	121.203	36.913
CIL1244S0021	3.797	7.217	96.787	51.55	65.627	36.91
CIL0984S0061	12.49	15.717	14.083	13.847	15.767	36.893
CIL0902S0136	12.65	16.323	21.827	20.98	27.337	36.873
CIL0967S0124	15.567	16.693	23.203	27.34	28.967	36.853
CIL0987S0041	13.133	14.777	16.92	20.277	22.36	36.85
CIL1336S0051	11.21	12.853	15.527	16.72	19.063	36.85
CIL1271S0026	17.607	12.797	12.597	22.593	32.153	36.81
CIL0261S0001	22.593	20.963	50.24	59.073	41.17	36.78
CIL1300S0062	12.63	23.98	42.457	44.673	41.557	36.75
CIL1219S0081	3.44	6.17	8.8	13.367	13.433	36.663
CIL1193S0087	8.717	10.35	11.71	17.993	22.387	36.657
CIL0893S0179	19.213	25.433	38.883	29.353	33.133	36.633
CIL0923S0146	15.2	12.09	39.757	26.437	16.23	36.633
CIL0023S0012	13.283	14.323	14.723	15.28	19.467	36.627
CIL1142S0060	8.317	11.05	22.183	21.543	26.07	36.62
CIL1592S0017	4.903	4.9	13.457	16.67	17.33	36.553
CIL0919S0014	0.88	0.58	0.937	4.24	10.263	36.543
CIL0094S0037	15.16	17.55	17.57	25.073	27.633	36.517
CIL1002S0002	14.897	19.527	25.06	24.927	26.923	36.487
CIL1029S0075	14.413	11.457	33.777	49.13	51.293	36.453
CIL1031S0094	2.52	2.343	7.677	13.007	23.32	36.45
CIL0942S0212	8.66	12.31	42	34.35	33.69	36.443
CIL0925S0024	3.15	3.703	24.123	33.23	37.007	36.393
CIL1330S0012	71.197	50.243	40.617	38.853	33.08	36.353
CIL0912S0116	135.557	102.793	116.503	108.23	87.767	36.33
CIL1308S0005	331.533	305.133	236.903	191.453	166.1	36.33
CIL0929S0088	20.51	17.86	97.617	87.52	42.74	36.303
CIL1051S0006	4.453	3.757	13.023	16.973	14.87	36.303
CIL1152S0066	113.297	127.09	123.893	88.283	76.027	36.273
CIL1405S0020	14.867	14.427	29.713	34.71	40.98	36.26
CIL1447S0025	6.38	8.633	21.407	15.983	14.333	36.257
CIL0909S0214	13.587	11.393	17.757	21.413	24.9	36.25
CIL1492S0038	19.253	20.293	42.53	44.197	49.137	36.233
CIL1436S0020	13.837	13.27	20.203	22.443	28.397	36.213
CIL1462S0003	1.193	1.627	7.087	26.393	32.187	36.21
CIL1481S0018	0.203	0.797	32.453	58.797	49.083	36.203
CIL1081S0028	12.263	13.217	18.07	20.72	24.407	36.107
CIL1326S0040	13.19	15.42	24.017	22.85	26.397	36.083
CIL1294S0038	3.587	7.257	12.467	17.537	19.873	36.013
CIL1219S0088	13.503	14.09	18.313	15.873	21.697	35.997
CIL0049S0015	0.873	4.82	12.703	37.983	40.027	35.98
CIL1520S0016	11.54	12.493	9.61	23.023	24.803	35.883
CIL1370S0016	0.94	2.037	10.16	50.833	61.707	35.85
CIL1582S0017	0.793	3.087	5.86	16.773	17.133	35.847
CIL1553S0004	204.867	177.19	141.72	130.627	121.98	35.823
CIL1194S0016	91.14	96.407	77.35	71.34	65.263	35.81
CIL1464S0038	465.613	428.367	264.873	191.143	166.247	35.807
CIL0909S0034	99.67	69.647	48.937	48.16	49.027	35.79
CIL1546S0005	16.823	21.333	27.423	29.523	31.65	35.78
CIL0942S0017	2.373	3.503	4.263	16.147	25.473	35.76
CIL0935S0007	3.677	15.33	34.03	122.577	155.38	35.74
CIL1182S0046	13.317	16.193	22.48	22.263	26.08	35.68
CIL1031S0115	3.193	3.173	30.04	49.74	72.537	35.677
CIL0942S0109	4.627	3.853	25.813	28.263	39.017	35.64
CIL0112S0019	12.003	13.98	22.073	22.49	25.017	35.62
CIL0984S0089	6.023	8.73	11.027	10.317	15.57	35.583
CIL1040S0085	13.91	18.57	17.103	22.283	26.13	35.58
CIL1325S0075	12.56	16.7	26.06	32.803	33.82	35.567
CIL1048S0045	71.163	63.75	65.94	61.42	59.013	35.563
CIL1411S0007	13.343	17.157	22.01	27.457	30.933	35.533
CIL1330S0046	10.363	11.893	3.44	12.797	16.583	35.483
CIL0989S0020	1.747	3.453	21.263	17.007	11.243	35.47
CIL1023S0011	14.03	8.503	25.853	31.853	29.173	35.47
CIL1534S0030	2.38	2.983	7.833	17.783	27.737	35.453
CIL0246S0018	6.61	6.74	6.487	10.473	16.82	35.45
CIL1564S0021	30.14	44.313	65.17	45.88	34.023	35.447
CIL1462S0011	71.703	75.37	83.773	83.04	69.887	35.36
CIL0203S0003	235.687	214.193	174.82	168.14	144.123	35.343
CIL1376S0005	15.833	13.983	25.047	31.933	34.083	35.307
CIL1167S0003	3.94	5.427	29.07	23.803	21.223	35.293
CIL0948S0100	17.383	15.587	21.697	23.967	27.347	35.28
CIL1584S0027	10.623	13.76	18.313	26.613	27.107	35.263
CIL0895S0055	75.927	68.957	73.813	64.603	57.02	35.25
CIL1562S0012	88.36	85.703	65.98	74.977	69.16	35.237
CIL1155S0024	1.23	1.63	25.49	36.403	50.84	35.22
CIL1246S0124	224.077	209.14	187.433	144.02	129.667	35.217
CIL1429S0033	18.983	21.66	27.087	37.637	38.387	35.213
CIL1047S0030	1.98	9.11	15.943	31.417	32.693	35.21
CIL1197S0014	92.677	91.667	93.177	71.757	60.923	35.203
CIL1087S0023	90.883	74.967	81.24	66.89	57.453	35.077
CIL0921S0051	9.783	11.057	15.013	16.24	21.233	35.073
CIL0976S0053	15.437	16.14	18.17	20.057	22.083	35.033
CIL0922S0066	143.17	170.747	110.577	76.277	66.037	34.977
CIL0925S0127	1.933	4.387	5.683	9.393	21.76	34.95
CIL0864S0001	13.617	36.78	21.093	19.96	14.87	34.91
CIL1090S0090	150.637	183.183	253.58	127.157	67.4	34.9
CIL1068S0013	10.68	12.14	15.483	19.927	24.72	34.873
CIL1245S0064	21.807	34.443	47.813	53.73	39.997	34.857
CIL0967S0181	99.337	155.907	113.683	96.22	84.487	34.853
CIL1464S0015	15.84	15.09	19.907	23.343	26.147	34.843
CIL0310S0021	1.973	1.427	3.4	3.64	8.813	34.84
CIL1165S0007	11.183	10.667	15.28	22.127	14.607	34.833
CIL1618S0001	14.217	15.067	23.697	25.893	31.793	34.773
CIL0914S0153	4.173	6.207	11.317	14.22	19.017	34.747
CIL0899S0004	1265.22	948.84	555.047	294.69	241.76	34.73
CIL0935S0148	19.11	23.58	47.287	47.167	50.01	34.707
CIL1575S0007	30.733	24.46	53.613	61.933	38.537	34.697
CIL1093S0003	0.117	0	0.203	0.61	4.397	34.64
CIL0957S0184	298.94	256.803	146.493	122.33	98.75	34.63
CIL0202S0004	2.637	5.45	15.483	15.727	16.67	34.58
CIL0899S0172	1.293	2.19	13.617	18.083	18.613	34.573
CIL0970S0055	13.95	22.097	46.043	35.137	45.567	34.573
CIL1167S0056	2.733	2.283	4.763	10.193	9.99	34.503
CIL1076S0057	12.037	15.527	20.79	20.713	24.497	34.497
CIL1130S0072	0.667	0.89	5.7	19.38	24.077	34.487
CIL1312S0032	0.613	0.797	2.227	8.057	18.577	34.48
CIL0246S0022	6.193	7.533	11.48	16.637	23.033	34.47
CIL1207S0068	113.77	130.097	114.633	87.39	86.293	34.46
CIL1031S0104	20.44	13.01	10.12	19.267	18.84	34.443
CIL1148S0066	104.027	94.97	98.43	71.407	64.713	34.44
CIL0976S0102	18.5	20.427	38.427	41.517	35.25	34.427
CIL1304S0024	81.467	83.797	69.453	65.8	63.547	34.423
CIL0480S0009	75.027	80.663	88.683	82.69	79.263	34.393
CIL0908S0168	313.333	197.64	146.47	125.39	129.09	34.39
CIL0923S0117	251.347	241.12	193.147	151.097	134.207	34.323
CIL1294S0044	2.47	3.703	5.47	15.903	25.09	34.253
CIL0902S0002	15.103	10.863	17.64	32.363	29.933	34.25
CIL0957S0186	16.233	20.57	31.783	27.353	31.577	34.24
CIL1422S0004	0.237	0.79	1.41	4.783	12.073	34.2
CIL1306S0036	181.183	193.083	116.527	75.73	71.837	34.18
CIL1142S0072	5.41	4.72	17.127	23.66	24.163	34.167
CIL0893S0108	6.563	4.78	7.687	29.047	42.34	34.14
CIL1090S0013	73.857	60.183	66.293	61.527	65.87	34.113
CIL0923S0244	0.717	0.72	4.143	29.313	23.873	34.11
CIL1396S0004	68.177	79.613	172.683	104.667	90.787	34.017
CIL1263S0041	74.383	59.803	47.217	39.633	39.807	33.98
CIL1205S0041	13.9	17.91	25.587	27.043	32.163	33.93
CIL1317S0048	16.633	17.913	19.203	23.08	25.327	33.927
CIL1099S0013	6.263	5.46	16.393	22.18	26.72	33.923
CIL1293S0077	15.8	18.003	21.69	25.2	27.667	33.917
CIL1131S0040	12.663	12.81	19.563	20.657	24.213	33.907
CIL1459S0018	2.887	3.143	18.82	43.007	51.563	33.897
CIL0480S0011	8.68	32.06	58.247	33.57	9.27	33.827
CIL0935S0004	15.42	19.22	25	29.41	31.98	33.823
CIL0996S0024	10.047	14.977	13.637	21.967	22.37	33.817
CIL0922S0069	2.763	3.663	9.607	11.817	15.78	33.783
CIL1244S0006	8.157	11.493	12.627	19.847	23.537	33.767
CIL1524S0011	263.557	212.033	157.273	159.453	86.747	33.767
CIL1009S0115	15.19	16.233	14.64	24.143	24.207	33.743
CIL1092S0006	13.887	15.66	14.477	27.83	33.077	33.713
CIL0919S0155	137.31	116.137	97.373	82.343	80.103	33.707
CIL1564S0051	12.047	15.967	27.73	28.25	29.91	33.647
CIL1303S0065	123.99	118.923	91.447	57.953	50.867	33.64
CIL1338S0009	115.107	147.387	135.593	77.937	48.98	33.6
CIL0415S0001	2.283	4.443	8.313	9.313	12.273	33.57
CIL1064S0022	2.267	5.31	10.313	14.733	26.933	33.57
CIL0262S0008	16.143	16.563	28.42	27.417	25.663	33.537
CIL0381S0012	9.1	1.453	2.607	3.557	13.223	33.503
CIL1127S0005	2.533	4.44	9.63	15.187	21.693	33.427
CIL1154S0020	15.473	9.81	32.203	26.257	21.983	33.427
CIL1184S0016	17.367	19.303	46.04	43.22	49.373	33.373
CIL1094S0025	16.18	20.763	25.38	25.64	26.65	33.33
CIL0962S0108	0.037	0.113	0.163	0.773	3.123	33.32
CIL1383S0028	429.807	293.31	230.637	210.58	198.257	33.297
CIL0908S0041	14.52	14.99	23.323	25.227	29.537	33.29
CIL1335S0008	3.783	2.33	1.927	8.307	14.04	33.287
CIL0998S0008	178.127	154.617	138.297	133.763	113.117	33.227
CIL1294S0046	1.353	2.087	10.623	13.303	14.963	33.157
CIL1037S0039	4.58	6.113	6.657	5.073	12.877	33.133
CIL0929S0084	13.35	16.613	18.367	22.34	27.743	33.117
CIL1332S0039	16.22	21.07	20.82	23.667	24.663	33.077
CIL1135S0022	5.033	6.163	13.56	15.47	18.063	33.073
CIL0049S0018	1.92	4.207	6.823	36.603	34.707	33.07
CIL0984S0059	14.427	11.937	14.7	13.92	15.39	33.063
CIL0235S0014	12.083	13.58	19.22	21.693	24.867	33.057
CIL0923S0105	7.74	10.097	26.243	24.467	20.89	33.057
CIL1508S0025	6.87	9.077	10.407	14.11	20.137	33.04
CIL1343S0054	66.867	68.26	60.037	54.183	54.46	32.963
CIL0979S0134	0.053	0.183	0.703	2.953	11.13	32.953
CIL1100S0113	13.497	12.123	22.777	26.18	29.013	32.93
CIL1283S0034	14.297	14.1	21.963	23.543	24.403	32.92
CIL1386S0046	12.667	16.07	20.01	19.357	20.513	32.917
CIL1038S0068	14.41	17.853	16.017	20.037	19.657	32.88
CIL1203S0018	13.753	18.243	21.133	25.64	30.047	32.847
CIL0923S0178	14.957	17.13	20.263	23.03	23.347	32.82
CIL0013S0011	15.6	14.623	14.653	14.037	16.283	32.813
CIL0909S0194	16.56	18.89	38.807	35.49	43.18	32.81
CIL0998S0009	86.877	79.72	71.433	66.267	67.877	32.78
CIL1131S0007	23.213	24.783	30.903	42.133	48.73	32.773
CIL1505S0009	17.53	21.74	33.193	37.423	39.983	32.773
CIL1579S0004	20.803	29.51	37.303	45.65	50.643	32.743
CIL1131S0013	8.557	8.497	8.803	11.167	16.657	32.737
CIL1197S0005	13.217	8.163	12.4	12.58	22.937	32.69
CIL1219S0065	76.09	89.23	77.723	64.97	57.673	32.613
CIL1393S0071	12.077	14.2	20.817	21.71	25.953	32.583
CIL1539S0023	68.677	66.273	79.843	70.79	55.527	32.5
CIL1387S0016	15.323	14.953	19.123	24.367	29.453	32.493
CIL1093S0055	135.453	111.35	97.557	93.81	82.777	32.47
CIL1265S0062	4.96	6.53	6.57	14.28	19.643	32.47
CIL0895S0077	5.117	8.01	7.927	12.863	17.46	32.437
CIL1399S0011	12.317	14.213	18.86	40.633	29.63	32.437
CIL0914S0021	19.297	23.247	36.517	40.26	30.077	32.43
CIL1216S0070	145.087	133.31	105.14	96.057	87.677	32.43
CIL0967S0110	21.803	23.837	57.94	81.16	59.337	32.417
CIL1154S0079	6.887	5.753	31.5	42.46	34.913	32.377
CIL1236S0044	5	4.377	18.86	22.033	21.537	32.353
CIL1094S0023	2.137	8.337	14.08	27.28	24.4	32.35
CIL1134S0008	0.41	0.843	3.69	6.453	13.903	32.34
CIL1025S0037	6.803	10.797	19.327	20.5	24.253	32.32
CIL0978S0105	65.83	73.07	62.627	44.247	33.647	32.303
CIL1156S0036	12.913	14.307	16.823	16.277	20.047	32.233
CIL1400S0011	3.773	4.36	11.423	14.503	24.237	32.207
CIL1230S0037	13.46	17.647	28.263	38.307	39.327	32.2
[truncated: 10,895 more rows]

## Sheet: Table S4
Table S4. Genes in clusters with different expression patterns.
Cluster 0	Cluster 1	Cluster 2	Cluster 3	Cluster 4	Cluster 5	Cluster 6	Cluster 7	Cluster 8	Cluster 9	Cluster 10	Cluster 11	Cluster 12	Cluster 13	Cluster 14	Cluster 15	Cluster 16	Cluster 17	Cluster 18	Cluster 19
CIL0922S0220	CIL0972S0009	CIL1500S0028	CIL1463S0020	CIL1445S0010	CIL1443S0019	CIL1230S0026	CIL1534S0014	CIL1132S0030	CIL1353S0004	CIL0203S0007	CIL0094S0012	CIL1068S0036	CIL1229S0008	CIL1156S0035	CIL1305S0038	CIL0212S0004	CIL0923S0154	CIL0967S0096	CIL1449S0008
CIL1531S0014	CIL1153S0015	CIL1236S0013	CIL0102S0011	CIL1494S0014	CIL0940S0080	CIL0923S0146	CIL0320S0016	CIL1099S0055	CIL1189S0013	CIL1546S0028	CIL0128S0016	CIL1201S0012	CIL1370S0036	CIL0917S0063	CIL0004S0010	CIL1348S0009	CIL0374S0002	CIL1119S0043	CIL1459S0009
CIL1417S0036	CIL1236S0047	CIL1023S0042	CIL0050S0003	CIL1562S0002	CIL0940S0082	CIL1110S0040	CIL0560S0001	CIL1229S0017	CIL1465S0025	CIL1099S0044	CIL0982S0028	CIL1424S0021	CIL0914S0010	CIL1015S0126	CIL1153S0085	CIL1383S0002	CIL1040S0017	CIL1021S0083	CIL0993S0094
CIL1305S0023	CIL0906S0159	CIL1219S0091	CIL1265S0033	CIL1534S0031	CIL1198S0021	CIL1207S0053	CIL1342S0046	CIL0001S0034	CIL1240S0035	CIL0215S0002	CIL1575S0020	CIL1325S0023	CIL0953S0117	CIL1402S0012	CIL1376S0012	CIL0914S0051	CIL0616S0001	CIL0860S0002	CIL0392S0012
CIL1263S0090	CIL0929S0075	CIL1161S0005	CIL0922S0087	CIL0923S0116	CIL0972S0097	CIL1047S0138	CIL1293S0050	CIL1147S0029	CIL0923S0198	CIL1568S0025	CIL0970S0165	CIL1396S0019	CIL1320S0030	CIL1431S0020	CIL0861S0001	CIL0864S0001	CIL1316S0029	CIL1187S0084	CIL1061S0081
CIL1324S0057	CIL1031S0104	CIL1264S0040	CIL1528S0028	CIL1163S0022	CIL1055S0070	CIL0893S0115	CIL1266S0038	CIL0942S0223	CIL0829S0003	CIL1192S0044	CIL0538S0004	CIL0893S0437	CIL1424S0033	CIL1028S0048	CIL1119S0080	CIL0480S0011	CIL0285S0005	CIL1211S0027	CIL0461S0006
CIL0897S0029	CIL1577S0043	CIL1274S0011	CIL0935S0150	CIL0953S0044	CIL0940S0081	CIL0143S0034	CIL1246S0003	CIL0948S0164	CIL0923S0033	CIL1520S0041	CIL0243S0012	CIL0125S0009	CIL1520S0005	CIL1053S0035	CIL1402S0015	CIL1454S0038	CIL1550S0021	CIL1083S0004	CIL1449S0006
CIL1545S0023	CIL1030S0017	CIL1361S0042	CIL1061S0051	CIL1559S0007	CIL1043S0079	CIL1259S0016	CIL1149S0069	CIL0344S0023	CIL0914S0087	CIL1323S0038	CIL0325S0012	CIL1165S0038	CIL1387S0008	CIL1063S0048	CIL1092S0072	CIL1157S0091	CIL1399S0010	CIL1346S0028	CIL1317S0076
CIL1048S0062	CIL1060S0047	CIL0002S0014	CIL1141S0012	CIL0938S0124	CIL0840S0001	CIL1076S0108	CIL1101S0032	CIL0393S0001	CIL0320S0002	CIL1433S0013	CIL1201S0002	CIL1524S0013	CIL1294S0024	CIL0992S0009	CIL0982S0128	CIL1038S0086	CIL1290S0021	CIL1443S0009	CIL0929S0040
CIL1169S0016	CIL1060S0049	CIL0990S0066	CIL1456S0013	CIL0935S0101	CIL1071S0085	CIL1409S0009	CIL0929S0096	CIL0902S0134	CIL0893S0337	CIL1187S0083	CIL1149S0049	CIL1157S0066	CIL1063S0089	CIL1173S0019	CIL1336S0053	CIL1133S0038	CIL0271S0011	CIL1340S0038	CIL0037S0002
CIL1351S0018	CIL1112S0041	CIL0976S0011	CIL0004S0006	CIL0692S0004	CIL1090S0050	CIL0156S0037	CIL1107S0015	CIL1330S0046	CIL0908S0037	CIL1154S0074	CIL0030S0018	CIL0967S0039	CIL1456S0051	CIL0218S0004	CIL1326S0027	CIL1300S0006	CIL1425S0048	CIL1144S0072	CIL1043S0080
CIL0978S0048	CIL0352S0005	CIL1173S0007	CIL0893S0216	CIL0443S0001	CIL0893S0008	CIL0919S0157	CIL0402S0001	CIL1533S0007	CIL1417S0042	CIL1293S0034	CIL1201S0019	CIL1130S0018	CIL1093S0072	CIL0259S0008	CIL1002S0009	CIL0957S0149	CIL1153S0126	CIL0782S0003	CIL1175S0049
CIL0906S0026	CIL1598S0004	CIL0982S0045	CIL1443S0031	CIL0945S0154	CIL1061S0080	CIL1266S0014	CIL0895S0112	CIL0984S0063	CIL1038S0129	CIL1370S0037	CIL0929S0008	CIL1503S0023	CIL1151S0010	CIL0982S0008	CIL1101S0073	CIL0895S0018	CIL1447S0041	CIL1501S0036	CIL1358S0031
CIL1166S0003	CIL0906S0078	CIL0982S0120	CIL1263S0001	CIL0945S0103	CIL1259S0052	CIL1027S0002	CIL1463S0032	CIL0490S0004	CIL1127S0034	CIL0583S0002	CIL1031S0018	CIL1031S0116	CIL0156S0002	CIL1235S0055	CIL1330S0022	CIL1066S0060	CIL1425S0047	CIL0945S0093	CIL1429S0030
CIL1048S0016	CIL1158S0090	CIL0987S0001	CIL0922S0194	CIL1020S0035	CIL1018S0070	CIL0937S0117	CIL1057S0082	CIL1481S0022	CIL0923S0205	CIL1120S0044	CIL1166S0048	CIL0919S0030	CIL1207S0007	CIL1462S0011	CIL1219S0056	CIL0253S0001	CIL1078S0051	CIL0922S0030	CIL0352S0003
CIL0897S0028	CIL0990S0136	CIL0914S0120	CIL0671S0001	CIL0978S0137	CIL0967S0046	CIL1348S0045	CIL1294S0075	CIL1030S0111	CIL1464S0033	CIL1148S0068	CIL1468S0031	CIL1164S0071	CIL0860S0001	CIL0967S0181	CIL0909S0215	CIL1061S0038	CIL1152S0003	CIL1555S0004	CIL1611S0019
CIL0979S0143	CIL0041S0016	CIL1242S0010	CIL1134S0102	CIL1157S0098	CIL0935S0118	CIL1326S0008	CIL1161S0011	CIL1084S0049	CIL0967S0084	CIL1071S0071	CIL1342S0004	CIL1145S0076	CIL1416S0073	CIL0480S0009	CIL0921S0077	CIL1184S0044	CIL0092S0016	CIL1557S0008	CIL1587S0005
CIL1189S0025	CIL1246S0074	CIL1034S0060	CIL1210S0016	CIL1230S0056	CIL0921S0022	CIL0909S0028	CIL1075S0005	CIL1175S0105	CIL1215S0005	CIL0935S0016	CIL1094S0060	CIL1312S0019	CIL1242S0088	CIL1047S0118	CIL0281S0010	CIL0496S0004	CIL1353S0034	CIL1619S0022	CIL1020S0108
CIL1146S0002	CIL1445S0032	CIL1535S0029	CIL1332S0009	CIL1055S0045	CIL0942S0097	CIL0938S0015	CIL0899S0127	CIL1146S0008	CIL1596S0011	CIL1029S0006	CIL1481S0031	CIL0309S0011	CIL1520S0063	CIL1492S0005	CIL0923S0142	CIL1273S0026	CIL1263S0039	CIL0982S0017	CIL0970S0039
CIL1090S0082	CIL0212S0010	CIL0235S0006	CIL1112S0062	CIL1154S0043	CIL1081S0062	CIL1086S0064	CIL1494S0013	CIL0974S0050	CIL1047S0120	CIL1025S0096	CIL1215S0003	CIL1294S0017	CIL1053S0045	CIL0437S0001	CIL1047S0047	CIL1564S0029	CIL0957S0051	CIL1031S0109	CIL0921S0079
CIL0070S0007	CIL0984S0058	CIL0691S0001	CIL1417S0095	CIL0455S0012	CIL0381S0012	CIL1482S0006	CIL1135S0031	CIL1258S0010	CIL0296S0001	CIL0235S0025	CIL1102S0040	CIL1056S0043	CIL1136S0068	CIL1418S0003	CIL0064S0016	CIL0917S0072	CIL1401S0016	CIL1348S0064	CIL1235S0008
CIL1061S0088	CIL0919S0017	CIL0893S0286	CIL0987S0115	CIL1002S0071	CIL0984S0059	CIL1207S0030	CIL1171S0045	CIL0513S0010	CIL1184S0065		CIL0134S0005	CIL1295S0005	CIL1001S0047	CIL1316S0015	CIL1361S0019	CIL1604S0003	CIL0929S0206	CIL1207S0064	CIL1444S0032
CIL1359S0031	CIL0992S0100	CIL1034S0059	CIL0979S0067	CIL1531S0029	CIL0013S0011	CIL1187S0001	CIL0906S0032	CIL0984S0079	CIL1547S0029		CIL1290S0041	CIL1169S0002	CIL1015S0037	CIL0908S0047	CIL1618S0023	CIL1282S0009	CIL1535S0027	CIL1114S0069	CIL1402S0020
CIL1434S0044	CIL1119S0055	CIL1050S0010	CIL1138S0037	CIL1130S0061	CIL1197S0005	CIL1021S0010	CIL1018S0017	CIL1499S0009	CIL0967S0226		CIL1094S0052	CIL0948S0076	CIL1034S0056	CIL1101S0069	CIL1061S0036	CIL1029S0019	CIL0131S0030	CIL0122S0007	CIL1002S0062
CIL1192S0058	CIL0385S0010	CIL0937S0093	CIL1190S0089	CIL1102S0051	CIL1401S0014	CIL1106S0042	CIL1525S0040	CIL1145S0101	CIL1230S0046		CIL1603S0046	CIL0010S0018	CIL0946S0097	CIL1144S0036	CIL1369S0035	CIL1153S0097	CIL1551S0004	CIL1037S0090	CIL1166S0013
CIL1078S0097	CIL0923S0230	CIL0203S0024	CIL0895S0004	CIL1037S0028	CIL1047S0135	CIL0925S0007	CIL1055S0048	CIL0572S0001	CIL1498S0023		CIL0967S0148	CIL1172S0018	CIL1047S0112	CIL0990S0178	CIL1502S0040	CIL0962S0103	CIL0948S0068	CIL0893S0175	CIL0955S0001
CIL0101S0009	CIL1405S0044	CIL1271S0036	CIL0992S0126	CIL0962S0113	CIL0917S0111		CIL1230S0047	CIL1102S0004	CIL1051S0063		CIL0074S0001	CIL0001S0041		CIL1384S0024	CIL1182S0039	CIL0937S0056	CIL0990S0062	CIL1515S0046	CIL1246S0063
CIL1197S0007	CIL1468S0015	CIL1132S0060	CIL1081S0002	CIL1154S0078	CIL0921S0023		CIL1028S0066	CIL1417S0073	CIL1145S0133		CIL0951S0048	CIL1082S0132		CIL1575S0008	CIL1171S0011	CIL0942S0057	CIL0895S0050	CIL1102S0101	CIL1193S0031
CIL0979S0178	CIL1340S0021	CIL0962S0062	CIL1546S0061	CIL1082S0059	CIL0024S0013		CIL0970S0120	CIL0983S0001	CIL1112S0078		CIL0948S0151	CIL1248S0040		CIL1204S0082	CIL1218S0045	CIL1446S0065	CIL0979S0039	CIL1519S0002	CIL1107S0023
CIL1020S0102	CIL0895S0187	CIL0293S0014	CIL1190S0058	CIL0984S0077	CIL0990S0041		CIL1602S0001	CIL1618S0021			CIL1061S0043	CIL1133S0040		CIL0957S0159	CIL1157S0075	CIL1104S0025	CIL1197S0077	CIL1189S0060	CIL0937S0044
CIL1020S0029	CIL1126S0076	CIL1321S0013	CIL1133S0070	CIL1222S0012	CIL1230S0050		CIL1172S0039	CIL1425S0053			CIL0073S0022	CIL1092S0077		CIL0099S0006	CIL1506S0017	CIL1339S0033	CIL0045S0004	CIL1199S0002	CIL0940S0027
CIL1096S0015	CIL0935S0009	CIL1319S0030	CIL1106S0054	CIL1222S0013	CIL0902S0172		CIL1531S0046	CIL0324S0003			CIL1158S0049	CIL1263S0036		CIL1469S0024	CIL1064S0122	CIL0937S0082	CIL1417S0030	CIL0967S0080	CIL0919S0018
CIL1607S0011	CIL0385S0016	CIL0998S0117	CIL0909S0243	CIL0559S0001	CIL1235S0052		CIL1178S0002	CIL1038S0130			CIL0967S0002	CIL1038S0065		CIL1038S0043	CIL1155S0041	CIL0437S0003	CIL1061S0047	CIL0261S0001	CIL1167S0033
CIL1458S0020	CIL1101S0101	CIL0445S0007	CIL1216S0078	CIL1280S0026	CIL1456S0032		CIL1128S0002	CIL0938S0018			CIL0923S0040	CIL1082S0063		CIL0313S0003	CIL1265S0056	CIL1126S0045	CIL0090S0006	CIL0929S0088	CIL0935S0032
CIL1304S0015	CIL0945S0114	CIL1003S0003	CIL0895S0001	CIL0182S0013	CIL0919S0177		CIL0220S0003	CIL0097S0008			CIL1546S0001	CIL0218S0016		CIL1396S0037	CIL1495S0031	CIL1608S0004	CIL0239S0004	CIL1564S0021	CIL1405S0077
CIL0979S0016	CIL1417S0059	CIL1084S0061	CIL1143S0050		CIL1277S0006		CIL1006S0086	CIL0884S0001			CIL1025S0047	CIL1068S0055		CIL1295S0028	CIL1110S0033	CIL1246S0143	CIL0247S0009	CIL1245S0064	CIL0957S0025
CIL1082S0115	CIL1245S0035	CIL1048S0085	CIL1367S0006		CIL0917S0068		CIL0302S0018	CIL1201S0029			CIL1147S0047	CIL0324S0009		CIL0938S0010	CIL1064S0014	CIL1330S0053	CIL1358S0008	CIL1575S0007	CIL1078S0094
CIL1207S0032	CIL1431S0030	CIL1500S0047	CIL1439S0026		CIL1494S0030		CIL0396S0004	CIL0170S0002			CIL1336S0049	CIL1265S0049		CIL0996S0026	CIL0045S0016	CIL0609S0002	CIL1508S0039	CIL1396S0004	CIL0324S0018
CIL1240S0059	CIL0293S0009	CIL0957S0145	CIL1611S0005		CIL0919S0126		CIL1101S0014	CIL0908S0005			CIL1538S0014	CIL1100S0077		CIL1317S0073	CIL1071S0067	CIL1315S0015	CIL1101S0026	CIL0914S0021	CIL1358S0026
CIL0929S0076	CIL0121S0017	CIL1220S0021	CIL1029S0062		CIL0929S0042		CIL1193S0093	CIL1393S0019			CIL1470S0020	CIL1166S0057		CIL0522S0001	CIL1416S0040	CIL1099S0095	CIL1138S0029	CIL0967S0110	CIL1153S0096
CIL0957S0008	CIL0739S0001	CIL1122S0079	CIL1083S0043		CIL1138S0033		CIL0316S0008	CIL1032S0119			CIL1216S0052	CIL1031S0107		CIL1141S0057	CIL0970S0027	CIL1218S0044	CIL1324S0042	CIL0182S0002	CIL0922S0228
CIL1578S0024	CIL0940S0050	CIL0921S0087	CIL0909S0115		CIL0156S0012		CIL1411S0023	CIL0987S0171			CIL1568S0026	CIL1056S0016		CIL0266S0010	CIL1598S0010	CIL1094S0064	CIL1037S0103	CIL1352S0012	CIL0486S0001
CIL0967S0034	CIL1120S0023	CIL1464S0030	CIL0921S0140		CIL0938S0105		CIL0463S0001	CIL1179S0040			CIL0946S0129	CIL1367S0019		CIL0512S0001	CIL1107S0051	CIL0942S0224	CIL0937S0097	CIL0370S0004	CIL1245S0045
CIL1335S0040	CIL0908S0175	CIL1439S0034	CIL0644S0034		CIL1557S0009		CIL1122S0015	CIL1118S0041			CIL1106S0017	CIL0938S0088		CIL0125S0006	CIL1449S0009	CIL0914S0093	CIL1029S0036	CIL1169S0015	CIL0320S0009
CIL1118S0087	CIL1001S0103	CIL0115S0001	CIL1020S0003		CIL0272S0012		CIL0899S0014	CIL1001S0092			CIL0487S0006	CIL0010S0050		CIL1029S0035	CIL1344S0020	CIL0935S0126	CIL1315S0027	CIL0380S0014	CIL0644S0015
CIL1381S0001	CIL1037S0093	CIL0953S0037	CIL1516S0004		CIL1366S0033		CIL1309S0001	CIL0978S0086			CIL1466S0013	CIL1138S0095		CIL0957S0082	CIL0987S0180	CIL1094S0030	CIL0942S0174	CIL1470S0010	CIL1082S0103
CIL0003S0002	CIL1055S0073	CIL1316S0037	CIL1585S0017		CIL1305S0051		CIL1207S0059	CIL1075S0003			CIL1443S0008	CIL1023S0094		CIL0990S0011	CIL1133S0016	CIL0112S0014	CIL0967S0001	CIL0922S0131	CIL0893S0430
CIL0990S0161	CIL0953S0023	CIL1081S0020	CIL0330S0006		CIL0293S0011		CIL0073S0017	CIL0650S0001			CIL1030S0103	CIL0990S0153		CIL0951S0008	CIL1216S0032	CIL1417S0028	CIL1244S0021	CIL1006S0002	CIL1500S0024
CIL1136S0066	CIL1236S0020	CIL0922S0190	CIL1090S0086		CIL0352S0004		CIL0383S0005	CIL0208S0002			CIL0951S0105	CIL0978S0101		CIL0001S0036	CIL1110S0034	CIL1219S0020	CIL1300S0062	CIL0929S0203	CIL0156S0018
CIL1155S0051	CIL1246S0084	CIL0951S0080	CIL1242S0042		CIL1446S0048		CIL1268S0065	CIL1439S0038			CIL0989S0014	CIL1497S0038		CIL1031S0131	CIL0912S0189	CIL1087S0030	CIL0893S0179	CIL1477S0023	CIL1179S0022
CIL0908S0137	CIL1325S0038	CIL1552S0027	CIL1266S0018		CIL1231S0051		CIL1236S0026	CIL1109S0001			CIL0437S0007	CIL1197S0044		CIL0945S0128	CIL1118S0073	CIL1148S0059	CIL1492S0038	CIL1147S0001	CIL0978S0022
CIL1595S0049	CIL1122S0095	CIL1224S0033	CIL0940S0018		CIL0990S0052		CIL1439S0001	CIL0476S0003			CIL0942S0214	CIL1003S0036		CIL1295S0006	CIL0987S0078	CIL0929S0105	CIL0935S0148	CIL1138S0070	CIL1265S0039
CIL1405S0051	CIL0302S0001	CIL1500S0005	CIL1310S0018		CIL0900S0003		CIL1095S0037	CIL1276S0012			CIL1100S0035	CIL1015S0079		CIL0929S0033	CIL1411S0008	CIL1369S0023	CIL0970S0055	CIL1201S0001	CIL1273S0008
CIL0309S0003	CIL1244S0016	CIL0064S0044	CIL1032S0114		CIL1053S0029		CIL0895S0026	CIL0214S0001			CIL0925S0130	CIL0929S0038		CIL1032S0127	CIL1263S0098	CIL1178S0024	CIL1184S0016	CIL0990S0107	CIL0967S0236
CIL0942S0058	CIL1363S0010	CIL0135S0017	CIL0009S0005		CIL0978S0188		CIL0979S0123	CIL1075S0002			CIL1306S0012	CIL1064S0007		CIL0923S0195	CIL1173S0025	CIL0130S0016	CIL0909S0194	CIL1190S0019	CIL1383S0019
CIL0246S0008	CIL0962S0099	CIL1018S0010	CIL0993S0017		CIL1015S0081		CIL1482S0043	CIL0009S0008			CIL0922S0125	CIL1037S0007		CIL0895S0239	CIL1030S0130	CIL1418S0009	CIL1579S0004	CIL1448S0027	CIL1028S0076
CIL1446S0064	CIL1066S0069	CIL0327S0002	CIL0912S0076		CIL1158S0042		CIL1047S0002	CIL1226S0025			CIL1158S0054	CIL1001S0100		CIL0422S0004	CIL0978S0130	CIL1021S0043	CIL1550S0017	CIL1262S0038	CIL0803S0001
CIL1135S0039	CIL1029S0029	CIL1253S0038	CIL1256S0059		CIL1210S0034		CIL1031S0058	CIL1370S0048			CIL1246S0006	CIL1081S0067		CIL0006S0024	CIL1146S0007	CIL0045S0022	CIL1196S0036	CIL1463S0027	CIL0902S0177
CIL0211S0005	CIL0189S0001	CIL1375S0043	CIL0923S0261		CIL1603S0003		CIL1078S0027	CIL0989S0010			CIL0135S0006	CIL1219S0017		CIL1460S0001	CIL1182S0055	CIL1259S0025	CIL0224S0004	CIL1229S0078	CIL1546S0059
CIL0929S0055	CIL1119S0065	CIL0121S0008	CIL0131S0018		CIL1308S0019		CIL1077S0004	CIL1020S0006			CIL0937S0141	CIL0979S0042		CIL1086S0016	CIL1038S0026	CIL0176S0026	CIL1094S0031	CIL1386S0010	CIL1084S0081
CIL1326S0043	CIL1242S0037	CIL0909S0189	CIL1057S0036		CIL0922S0076		CIL0919S0009	CIL1158S0062			CIL1399S0034	CIL0183S0002		CIL1207S0018	CIL1006S0079	CIL0917S0035	CIL0940S0108	CIL0037S0003	CIL1216S0066
CIL1520S0012	CIL0143S0030	CIL0893S0139	CIL1032S0029		CIL0325S0011		CIL1018S0130	CIL1110S0074			CIL1145S0051	CIL1038S0018		CIL0094S0015	CIL1263S0051	CIL1020S0015	CIL1313S0010	CIL1038S0053	CIL0902S0163
CIL1122S0046	CIL1078S0030	CIL1518S0019	CIL0929S0072		CIL1076S0013		CIL0222S0013	CIL0101S0005			CIL1340S0029	CIL1184S0043		CIL0526S0001	CIL1049S0001	CIL0929S0073	CIL1078S0050	CIL1198S0008	CIL0438S0001
CIL1031S0122	CIL1034S0067	CIL0037S0020	CIL1467S0018		CIL0929S0065		CIL1048S0020	CIL1417S0091			CIL1031S0067	CIL1497S0015		CIL0945S0160	CIL1231S0033	CIL0425S0011	CIL1463S0029	CIL1371S0092	CIL1021S0111
CIL1184S0026	CIL1305S0047	CIL1009S0094	CIL1057S0037		CIL1282S0036		CIL1148S0037	CIL0071S0001			CIL1032S0130	CIL0937S0159		CIL1031S0108	CIL1462S0017	CIL1078S0075	CIL0266S0014	CIL1148S0067	CIL1068S0049
CIL1180S0030	CIL1185S0040	CIL1535S0025	CIL1378S0027		CIL0899S0134		CIL0309S0001	CIL1467S0038			CIL0420S0009	CIL1136S0031		CIL1317S0084	CIL1342S0007	CIL1534S0020	CIL1254S0023	CIL0914S0131	CIL1312S0001
CIL1304S0003	CIL1254S0030	CIL1192S0046	CIL1021S0029		CIL1193S0040		CIL0899S0090	CIL0476S0004			CIL1127S0095	CIL0897S0039		CIL1087S0018	CIL1546S0060	CIL1300S0077	CIL1358S0047	CIL0951S0037	CIL0367S0003
CIL1249S0019	CIL0302S0019	CIL1031S0045	CIL1136S0001		CIL1015S0080		CIL0948S0220	CIL0991S0001			CIL1147S0015	CIL1158S0027		CIL0170S0012	CIL0940S0067	CIL0929S0059	CIL1366S0031	CIL1230S0018	CIL1273S0007
CIL1256S0053	CIL1131S0036	CIL1106S0058	CIL0912S0194		CIL1102S0036		CIL1384S0009	CIL1560S0001			CIL0942S0003	CIL1262S0024		CIL0366S0003	CIL1251S0019	CIL0990S0148	CIL1614S0021	CIL0940S0181	CIL1047S0144
CIL1092S0061	CIL1404S0019	CIL0922S0179	CIL1031S0065		CIL0967S0062		CIL1482S0018	CIL0909S0216			CIL1082S0117	CIL0940S0010		CIL1405S0078	CIL1157S0014	CIL1051S0070	CIL0316S0014	CIL1031S0057	CIL0009S0040
CIL1031S0133	CIL1064S0008	CIL1064S0102	CIL1193S0094		CIL0948S0016		CIL0789S0001	CIL1229S0043			CIL1585S0013	CIL1333S0036		CIL1204S0058	CIL0923S0145	CIL1424S0027	CIL0979S0061	CIL0899S0037	CIL1009S0085
CIL1361S0028	CIL0937S0051	CIL1057S0060	CIL1211S0026		CIL0895S0202		CIL0895S0087	CIL1081S0082			CIL1484S0006	CIL1153S0080		CIL1146S0028	CIL1353S0001	CIL1145S0029	CIL0987S0080	CIL1246S0078	CIL1564S0017
CIL1120S0018	CIL1001S0104	CIL1084S0052	CIL1258S0008		CIL1332S0038		CIL1258S0003	CIL0922S0104				CIL1018S0132		CIL1055S0057	CIL1424S0010	CIL1153S0044	CIL0935S0002	CIL1440S0010	CIL1118S0059
CIL0908S0166	CIL1582S0019	CIL1564S0048	CIL0330S0005		CIL0262S0006		CIL1451S0003	CIL1185S0028				CIL1447S0021		CIL0319S0009	CIL1152S0068	CIL1038S0070	CIL1161S0008	CIL1002S0060	CIL1069S0001
CIL0922S0246	CIL1002S0049	CIL1273S0034	CIL0893S0107		CIL1055S0031		CIL0893S0321	CIL0727S0001				CIL0176S0016		CIL1528S0033	CIL1204S0054	CIL1095S0067	CIL0411S0002	CIL1221S0017	CIL0948S0161
CIL1384S0010	CIL0982S0134	CIL0942S0007	CIL0360S0002		CIL1449S0028		CIL1219S0057	CIL1277S0021				CIL1154S0072		CIL1114S0081	CIL1060S0039	CIL1282S0032	CIL0929S0106	CIL0974S0099	CIL1246S0028
CIL1512S0041		CIL0957S0012	CIL0970S0137		CIL1325S0058		CIL1210S0052	CIL1064S0065				CIL1508S0037		CIL1043S0057	CIL1057S0047	CIL0909S0080	CIL0212S0024	CIL0489S0010	CIL1051S0069
CIL1167S0038		CIL1236S0011	CIL1485S0002		CIL1135S0044		CIL0984S0088	CIL1178S0052				CIL1037S0069		CIL0235S0010	CIL1325S0078	CIL1143S0025	CIL1546S0026	CIL1470S0005	CIL0909S0224
CIL0912S0098			CIL1436S0051		CIL1149S0045		CIL1118S0016	CIL0439S0004				CIL1061S0002		CIL0893S0042	CIL0978S0128	CIL1348S0058	CIL1107S0039	CIL1242S0016	CIL0935S0025
CIL1087S0042			CIL0925S0069		CIL1198S0020			CIL1562S0030				CIL1265S0073		CIL1424S0020	CIL0951S0068	CIL0923S0104	CIL1076S0113	CIL1484S0020	CIL1265S0070
CIL1180S0049			CIL1502S0057		CIL1332S0050			CIL1096S0046				CIL0120S0008		CIL1316S0006	CIL1330S0052	CIL1047S0108	CIL0953S0098	CIL0134S0022	CIL1358S0032
CIL1326S0042			CIL0436S0007		CIL1554S0022			CIL1101S0002				CIL1098S0012		CIL1274S0031		CIL1456S0039	CIL0030S0008	CIL0906S0021	CIL0260S0005
CIL1310S0039			CIL1242S0069		CIL1239S0021			CIL1023S0012				CIL0946S0005		CIL0925S0004		CIL0782S0004	CIL1165S0016	CIL0925S0075	CIL1155S0020
CIL1155S0003			CIL0921S0040		CIL1471S0033			CIL0921S0101				CIL1152S0071		CIL1378S0012		CIL1084S0054	CIL1075S0033	CIL1251S0023	CIL0914S0049
CIL1479S0019			CIL1573S0005		CIL1229S0002			CIL1587S0022				CIL1047S0014		CIL1032S0071		CIL1231S0024	CIL0923S0049	CIL0191S0002	CIL1149S0046
CIL1413S0005			CIL1077S0006		CIL1230S0035			CIL1256S0060				CIL1500S0008		CIL0917S0099		CIL0935S0011	CIL1300S0079	CIL0938S0139	CIL1384S0023
CIL1093S0008			CIL1295S0002		CIL0967S0235			CIL0921S0144				CIL0923S0068		CIL1131S0058		CIL1259S0072	CIL0912S0041	CIL1607S0014	CIL1018S0091
CIL1071S0034			CIL1105S0008		CIL1060S0086			CIL0457S0001				CIL1562S0013		CIL1099S0079		CIL1564S0058	CIL0984S0117	CIL0957S0194	CIL0833S0001
CIL1325S0072			CIL1413S0010		CIL0922S0103			CIL1132S0062				CIL0908S0152		CIL0948S0054		CIL0243S0013	CIL1266S0040	CIL1318S0029	CIL0978S0156
CIL1032S0005			CIL1015S0112		CIL0067S0010			CIL1071S0064				CIL1486S0002		CIL1369S0030		CIL0293S0002	CIL1263S0060	CIL1251S0042	CIL0996S0033
CIL1246S0118			CIL1298S0012		CIL0987S0039			CIL1153S0087				CIL0979S0058		CIL0972S0117		CIL1076S0019	CIL0909S0127	CIL1383S0013	CIL1037S0067
CIL1147S0090			CIL1259S0080		CIL1365S0017			CIL1051S0083				CIL1034S0049		CIL0908S0169		CIL1162S0007	CIL0893S0427	CIL0568S0001	CIL0978S0077
CIL0990S0175			CIL1154S0081		CIL1081S0030			CIL1315S0012				CIL1516S0010		CIL0967S0092		CIL1313S0050	CIL1176S0013	CIL1096S0049	CIL1354S0015
CIL0970S0081			CIL1083S0016		CIL1127S0039			CIL1619S0003				CIL0304S0004		CIL1138S0014		CIL1405S0026	CIL1107S0001	CIL1232S0043	CIL1358S0005
CIL1192S0070			CIL0902S0200		CIL1503S0011			CIL0151S0016				CIL1099S0097		CIL1031S0016		CIL1082S0075	CIL1434S0039	CIL1588S0018	CIL0407S0007
CIL1370S0035			CIL1047S0094		CIL1579S0017			CIL1215S0045				CIL1021S0071		CIL1228S0012		CIL1481S0008	CIL1162S0004	CIL0978S0140	CIL1158S0083
CIL0902S0006			CIL1185S0039		CIL1149S0006			CIL0974S0069				CIL1529S0004		CIL0454S0007		CIL0008S0009	CIL0942S0022	CIL0942S0111	CIL1197S0061
CIL1185S0016			CIL0611S0001		CIL0010S0034			CIL1131S0100				CIL1078S0009		CIL0170S0005		CIL1591S0011	CIL1371S0091	CIL1207S0029	CIL1018S0087
CIL0151S0009			CIL1023S0088		CIL1157S0071			CIL1144S0056				CIL1025S0107		CIL0957S0052		CIL0978S0149	CIL0222S0007	CIL1283S0052	CIL0948S0228
CIL1482S0040			CIL1102S0049		CIL1020S0057			CIL1178S0055				CIL1332S0046		CIL1384S0012		CIL1112S0020	CIL0080S0003	CIL0940S0164	CIL1163S0013
CIL0319S0006			CIL1413S0008		CIL1343S0017			CIL1094S0096				CIL1135S0054		CIL1447S0040		CIL0922S0070	CIL1021S0049	CIL1318S0014	CIL0990S0017
CIL1066S0058			CIL0011S0003		CIL0010S0047			CIL1506S0030				CIL1118S0002		CIL0951S0053		CIL0465S0005	CIL0908S0096	CIL1006S0055	CIL1203S0030
CIL1100S0114			CIL1249S0015		CIL1182S0093			CIL0935S0119				CIL0094S0011		CIL1577S0027		CIL0902S0174	CIL1508S0013	CIL1136S0046	CIL0416S0009
CIL1528S0008			CIL1100S0090		CIL1032S0069			CIL0974S0070				CIL0919S0084		CIL1164S0008		CIL1456S0024	CIL0967S0019	CIL1306S0011	CIL1018S0131
CIL1099S0058			CIL0996S0068		CIL1102S0074			CIL0902S0211				CIL1515S0048		CIL1037S0030		CIL1293S0014	CIL0211S0003	CIL0912S0149	CIL0935S0010
CIL0893S0155			CIL1130S0076		CIL1471S0006			CIL0893S0303				CIL0309S0006		CIL0942S0043		CIL1066S0013	CIL0945S0099	CIL1416S0012	CIL1587S0002
CIL1196S0069			CIL1009S0096		CIL1126S0041			CIL1198S0016				CIL1057S0105		CIL0951S0031		CIL1458S0044	CIL0143S0012	CIL1244S0015	CIL1449S0007
CIL1454S0024			CIL0953S0104		CIL1145S0001			CIL1101S0001				CIL1359S0018		CIL1107S0021		CIL1145S0020	CIL1023S0050	CIL1391S0006	CIL0957S0123
CIL1154S0076			CIL1093S0134		CIL1439S0031			CIL0940S0202				CIL0978S0083		CIL1149S0059		CIL1048S0001	CIL1165S0031	CIL1136S0045	CIL1361S0065
CIL0923S0070			CIL1492S0021		CIL0014S0001			CIL1001S0034				CIL1237S0024		CIL1369S0025		CIL1251S0008	CIL1031S0010	CIL1071S0063	CIL1525S0029
CIL1118S0015			CIL0408S0004		CIL1235S0054			CIL0281S0003				CIL1225S0041		CIL0919S0200		CIL0893S0266	CIL1462S0018	CIL0156S0015	CIL1608S0012
CIL1030S0150			CIL1613S0013		CIL0990S0098			CIL0380S0016				CIL0906S0076		CIL0923S0254		CIL0921S0069	CIL1387S0007	CIL0906S0062	CIL1178S0045
CIL1280S0017			CIL1530S0001		CIL1198S0019			CIL1219S0055				CIL0921S0053		CIL1025S0062		CIL0176S0006	CIL1380S0021	CIL1294S0060	CIL1090S0053
CIL0922S0023			CIL0127S0004		CIL0979S0063			CIL1513S0016				CIL1086S0052		CIL1383S0036		CIL1193S0084	CIL1203S0012	CIL1147S0069	CIL1468S0013
CIL1122S0097			CIL1211S0042		CIL1245S0021			CIL1153S0076				CIL1056S0044		CIL0979S0171		CIL0293S0025	CIL1251S0014	CIL1404S0013	CIL0053S0008
CIL1076S0115			CIL0251S0002		CIL1367S0003			CIL0176S0050				CIL1030S0126		CIL0189S0006		CIL1481S0006	CIL1596S0017	CIL0942S0216	CIL1570S0023
CIL1341S0025			CIL0938S0001		CIL0848S0003			CIL1459S0014				CIL1317S0065		CIL1113S0058		CIL1267S0005	CIL1126S0036	CIL1100S0041	CIL1163S0009
CIL1094S0087			CIL1018S0063		CIL1106S0034			CIL0935S0093				CIL1527S0002		CIL0909S0213		CIL1446S0044	CIL1082S0050	CIL1107S0044	CIL1219S0064
CIL1333S0019			CIL1029S0058		CIL0925S0119			CIL1363S0028				CIL0976S0101		CIL1539S0026		CIL1446S0054	CIL1047S0074	CIL0925S0077	CIL0006S0011
CIL0160S0008			CIL1061S0030		CIL1317S0011			CIL0469S0006				CIL0143S0036		CIL1098S0016		CIL1031S0052	CIL1107S0041	CIL1006S0099	CIL1358S0028
CIL0893S0147			CIL0399S0004		CIL1398S0004			CIL1156S0046				CIL1178S0007		CIL0893S0205		CIL0979S0159	CIL1277S0026	CIL0008S0021	CIL0163S0008
CIL0026S0017			CIL1222S0018		CIL1021S0070			CIL1461S0006				CIL0899S0016		CIL1383S0008		CIL0929S0092	CIL0948S0144	CIL1531S0059	CIL1204S0081
CIL1002S0064			CIL1231S0085		CIL0922S0144			CIL1219S0041				CIL1021S0024		CIL1047S0095		CIL0937S0090	CIL1570S0016	CIL1055S0119	CIL1305S0050
CIL1277S0073			CIL0929S0057		CIL0185S0009			CIL0043S0002				CIL1563S0001		CIL0899S0166		CIL1093S0007	CIL1110S0054	CIL1615S0023	CIL0946S0082
CIL0914S0072			CIL1204S0012		CIL1056S0040			CIL1268S0063				CIL0926S0002		CIL0909S0157		CIL1372S0016	CIL1093S0060	CIL0166S0003	CIL1143S0014
CIL1145S0022			CIL0373S0005		CIL1031S0072			CIL1341S0037				CIL0912S0147		CIL0979S0074		CIL0355S0002	CIL0243S0011	CIL0895S0002	CIL0895S0150
CIL1409S0029			CIL1222S0017		CIL1390S0019			CIL1212S0007				CIL0989S0099		CIL1184S0035		CIL1136S0063	CIL1087S0049	CIL1143S0094	CIL0990S0134
CIL1034S0030			CIL1460S0009		CIL0897S0094			CIL0917S0142				CIL1244S0030		CIL0899S0026		CIL0982S0157	CIL1106S0010	CIL1565S0008	CIL1546S0058
CIL1040S0031			CIL0235S0012		CIL1531S0002			CIL0008S0011				CIL1446S0071		CIL1032S0074		CIL1221S0018	CIL0945S0112	CIL0925S0106	CIL1031S0001
CIL1264S0069			CIL0917S0145		CIL0922S0205			CIL1127S0011				CIL0893S0142		CIL0409S0003		CIL1031S0056	CIL0316S0012	CIL1061S0124	CIL1494S0031
CIL1256S0064			CIL1032S0126		CIL1009S0097			CIL0912S0191				CIL1328S0065		CIL1083S0018		CIL1330S0052	CIL1101S0021	CIL0992S0099	CIL0010S0048
CIL1264S0013			CIL1061S0020					CIL1525S0001				CIL0937S0039		CIL1018S0114			CIL1584S0013	CIL1012S0131	CIL1048S0014
CIL1541S0004			CIL0176S0062					CIL1267S0007				CIL1153S0030		CIL1038S0096			CIL1276S0010	CIL1099S0093	CIL1497S0054
CIL1306S0008			CIL1031S0041					CIL1619S0006				CIL1012S0082		CIL0970S0123			CIL0902S0216	CIL0951S0003	CIL1374S0004
CIL1462S0014			CIL1009S0030					CIL1539S0004				CIL1048S0033		CIL0156S0038			CIL1012S0097	CIL0962S0164	CIL1246S0075
CIL1166S0028			CIL0987S0163					CIL1053S0050				CIL1513S0014		CIL1099S0024			CIL0921S0102	CIL0976S0111	CIL0060S0001
CIL1584S0030			CIL0908S0014					CIL1029S0082				CIL1068S0035		CIL1184S0001			CIL0945S0098	CIL0893S0415	CIL1197S0036
CIL1118S0046			CIL0912S0195					CIL1501S0027				CIL1094S0079		CIL1147S0072			CIL1015S0121	CIL1101S0095	CIL1173S0023
CIL0338S0022			CIL1242S0071					CIL1098S0030				CIL0893S0031		CIL1402S0038			CIL1339S0032	CIL1032S0007	CIL0914S0091
CIL0001S0043			CIL0392S0007					CIL0948S0223				CIL1393S0018		CIL1273S0014			CIL1469S0042	CIL1390S0007	CIL1030S0146
CIL0953S0030			CIL1543S0014					CIL0984S0126				CIL0917S0001		CIL0064S0008			CIL0243S0014	CIL1179S0014	CIL0385S0017
CIL1083S0024			CIL1185S0036					CIL0925S0148				CIL0895S0184		CIL0325S0004			CIL1436S0021	CIL1325S0043	CIL1305S0033
CIL0937S0061			CIL1222S0016					CIL1321S0001				CIL0408S0005		CIL0957S0104			CIL1204S0028	CIL1094S0080	CIL1229S0070
CIL0942S0198			CIL1452S0006					CIL1361S0043				CIL1084S0031		CIL0908S0123			CIL1405S0005	CIL0925S0076	CIL1090S0014
CIL0041S0006			CIL1066S0088					CIL0068S0004				CIL1469S0005		CIL0218S0017			CIL1507S0030	CIL0023S0013	CIL1057S0089
CIL1078S0057			CIL0635S0004					CIL0962S0148				CIL1020S0082		CIL1222S0058			CIL0003S0017	CIL0013S0021	CIL0978S0032
CIL0929S0156			CIL0908S0015									CIL1047S0131		CIL1061S0101			CIL1171S0058	CIL1577S0020	CIL1025S0113
CIL1446S0003			CIL1071S0115									CIL1422S0024		CIL1204S0007			CIL1321S0049	CIL0450S0011	CIL0984S0056
CIL0937S0020			CIL1156S0017									CIL1482S0001		CIL1147S0033			CIL0101S0008	CIL1037S0087	CIL1431S0026
CIL1336S0047			CIL1179S0044									CIL0922S0057		CIL1153S0017			CIL1293S0018	CIL0310S0001	CIL0117S0006
CIL1216S0043			CIL1215S0046									CIL0948S0030		CIL1055S0076			CIL0967S0099	CIL1505S0023	CIL0902S0169
CIL0130S0011			CIL1383S0009									CIL1333S0013		CIL0990S0159			CIL1153S0055	CIL1158S0074	CIL0987S0038
CIL1102S0071			CIL0182S0013									CIL0942S0112		CIL1349S0001			CIL0782S0014	CIL1503S0013	CIL1154S0063
CIL1323S0033												CIL1139S0005		CIL1126S0094			CIL1436S0049	CIL0923S0077	CIL1516S0016
CIL1486S0049												CIL1201S0008		CIL1018S0058			CIL1290S0022	CIL1147S0060	CIL1265S0018
CIL0106S0013												CIL1348S0008		CIL1141S0011			CIL1503S0002	CIL0921S0019	CIL1106S0004
CIL1147S0035												CIL1100S0026		CIL1497S0052			CIL0970S0042	CIL0061S0012	CIL1057S0032
CIL0972S0125												CIL0008S0018		CIL1407S0009			CIL1277S0055	CIL1048S0065	CIL0967S0106
CIL1263S0084												CIL1087S0001		CIL1384S0022			CIL0992S0046	CIL1290S0020	CIL0937S0165
CIL1034S0072												CIL1156S0067		CIL1031S0153			CIL0893S0094	CIL1031S0012	CIL0895S0054
CIL1133S0026												CIL0371S0010		CIL1268S0018			CIL0242S0006	CIL1169S0044	CIL0922S0042
CIL1180S0016												CIL0925S0099		CIL1587S0024			CIL1001S0054	CIL1312S0043	CIL1406S0036
CIL1028S0072												CIL0996S0043		CIL0384S0006			CIL1127S0084	CIL1598S0001	CIL1547S0020
CIL1215S0053												CIL1591S0015		CIL0967S0053			CIL1157S0017	CIL1151S0015	CIL0970S0132
CIL1099S0039												CIL1087S0058		CIL0976S0022			CIL0897S0053	CIL1034S0070	CIL1348S0047
CIL1300S0069												CIL1370S0018		CIL0957S0058			CIL0130S0017	CIL1497S0020	CIL1385S0005
CIL1207S0022												CIL0177S0025		CIL0990S0104			CIL1565S0009	CIL0002S0015	CIL1180S0031
CIL0922S0072												CIL0937S0033		CIL1197S0032			CIL0185S0014	CIL0086S0011	CIL1096S0020
CIL1482S0042												CIL1038S0089		CIL1375S0004			CIL1012S0046	CIL0205S0006	CIL0599S0004
CIL0037S0023												CIL1082S0120		CIL1002S0068			CIL1452S0001	CIL1093S0138	CIL0935S0135
CIL1156S0014												CIL0912S0192		CIL0053S0002			CIL1286S0047	CIL0604S0001	CIL1128S0058
CIL1330S0037												CIL1524S0017		CIL1359S0037			CIL1012S0109	CIL1226S0001	CIL0475S0002
CIL1330S0012												CIL0344S0016		CIL1173S0034			CIL0899S0151	CIL1520S0004	CIL1520S0014
CIL0912S0116												CIL0990S0184		CIL0967S0169			CIL1003S0059	CIL0909S0227	CIL1594S0019
CIL1308S0005												CIL1339S0021		CIL1081S0010			CIL0909S0137	CIL1293S0035	CIL1399S0001
CIL1152S0066												CIL1104S0050		CIL1503S0004			CIL1353S0029	CIL1585S0002	CIL1401S0024
CIL1553S0004												CIL1118S0083		CIL0976S0104			CIL1534S0015	CIL1164S0025	CIL0899S0128
CIL1194S0016												CIL1006S0121		CIL1164S0028			CIL1386S0001	CIL1564S0022	CIL0207S0011
CIL1464S0038														CIL1015S0015			CIL1211S0053	CIL0664S0001	CIL1434S0040
CIL0909S0034														CIL1240S0007			CIL1231S0013	CIL1040S0035	CIL1114S0043
CIL1048S0045														CIL1526S0023			CIL0870S0001	CIL0359S0010	CIL0948S0122
CIL0203S0003														CIL0935S0151			CIL0146S0018	CIL0024S0022	CIL1515S0049
CIL0895S0055														CIL0919S0141			CIL1303S0051	CIL1268S0016	CIL0970S0117
CIL1562S0012														CIL1138S0093			CIL1001S0053	CIL0473S0009	CIL0967S0017
CIL1246S0124														CIL1142S0032			CIL1210S0054	CIL0938S0119	CIL1090S0076
CIL1197S0014														CIL1064S0076			CIL0185S0015	CIL1105S0029	CIL1216S0098
CIL1087S0023														CIL1029S0034			CIL1596S0022	CIL0730S0001	CIL1557S0015
CIL0922S0066														CIL1001S0066			CIL1063S0042	CIL0937S0098	CIL1194S0049
CIL1090S0090														CIL1162S0039			CIL0909S0193	CIL1009S0027	CIL1090S0041
CIL0899S0004														CIL0027S0008			CIL1094S0050	CIL0211S0010	CIL1196S0046
CIL0957S0184														CIL1204S0044			CIL1564S0026	CIL1127S0085	CIL1057S0030
CIL1207S0068														CIL1009S0116			CIL1145S0089	CIL1031S0126	CIL1057S0041
CIL1148S0066														CIL0184S0001			CIL1101S0044	CIL1469S0021	CIL1386S0004
CIL1304S0024														CIL1107S0053			CIL1155S0056	CIL1003S0076	CIL0917S0112
CIL0908S0168														CIL1271S0018			CIL0899S0180	CIL1050S0012	CIL0914S0042
CIL0923S0117														CIL1171S0006			CIL1329S0001	CIL0923S0157	CIL0893S0152
CIL1306S0036														CIL1359S0001			CIL0902S0115	CIL0021S0023	CIL0450S0012
CIL1090S0013														CIL1417S0101			CIL0122S0011	CIL1325S0088	CIL0909S0069
CIL1263S0041														CIL1114S0031			CIL1141S0042	CIL0922S0210	CIL1371S0101
CIL1524S0011														CIL1029S0040			CIL0993S0056	CIL0919S0121	CIL1282S0011
CIL0919S0155														CIL1239S0032			CIL0925S0070	CIL1316S0028	CIL1141S0041
CIL1303S0065														CIL0512S0005			CIL1038S0057	CIL1420S0003	CIL0957S0026
CIL1338S0009														CIL1112S0026			CIL0893S0413	CIL0984S0071	CIL1025S0070
CIL1383S0028														CIL1149S0080			CIL1056S0066	CIL0917S0073	CIL0008S0019
CIL0998S0008														CIL1151S0020			CIL0098S0007	CIL1031S0138	CIL1145S0103
CIL1343S0054														CIL1371S0066			CIL0665S0001	CIL1492S0035	CIL0454S0004
CIL0998S0009														CIL1149S0083			CIL0938S0132	CIL1596S0042	CIL1494S0051
CIL1219S0065														CIL1068S0083			CIL1060S0082	CIL1025S0128	CIL0041S0015
CIL1539S0023														CIL1380S0022			CIL0557S0001	CIL0914S0068	CIL0866S0002
CIL1093S0055														CIL0037S0029			CIL0064S0034	CIL1526S0001	CIL0923S0029
CIL1216S0070														CIL1164S0011			CIL1012S0130	CIL0990S0112	CIL0041S0013
CIL0978S0105														CIL1055S0098			CIL0909S0053	CIL1144S0042	CIL1467S0036
CIL0990S0019														CIL0929S0100			CIL1138S0061	CIL1245S0050	CIL0984S0083
CIL0906S0043														CIL1320S0021			CIL0009S0037	CIL0970S0101	CIL1512S0036
CIL1259S0010														CIL0951S0092			CIL0978S0144	CIL1148S0016	CIL0218S0028
CIL1549S0028														CIL0895S0196			CIL1564S0014	CIL0978S0084	CIL0155S0005
CIL1154S0040														CIL1403S0041			CIL0145S0009	CIL1082S0113	CIL1330S0002
CIL0909S0155														CIL1076S0042			CIL1112S0055	CIL1142S0022	CIL0008S0013
CIL1107S0026														CIL1012S0053			CIL1424S0012	CIL0987S0124	CIL0912S0050
CIL0990S0069														CIL0982S0139			CIL1537S0015	CIL0895S0009	CIL0970S0013
CIL1312S0021														CIL1149S0090			CIL0902S0122	CIL1325S0006	CIL1343S0026
CIL1156S0019														CIL0967S0146			CIL1502S0024	CIL1333S0003	CIL1020S0127
CIL0923S0099														CIL1265S0044			CIL0967S0098	CIL1263S0009	CIL0411S0006
CIL1578S0015														CIL1023S0005			CIL1399S0029	CIL0951S0111	CIL0978S0044
CIL1266S0008														CIL1497S0008			CIL0925S0072	CIL1037S0019	CIL0962S0027
CIL1164S0080														CIL1158S0070			CIL0923S0103	CIL1084S0070	CIL1060S0085
CIL0170S0019														CIL1425S0036			CIL1068S0097	CIL1594S0004	CIL1315S0003
CIL0948S0173														CIL1198S0037			CIL1104S0026	CIL1434S0024	CIL1577S0040
CIL1308S0009														CIL1198S0043			CIL1390S0008	CIL1343S0042	CIL1051S0057
CIL1038S0062														CIL0974S0038			CIL0929S0103	CIL1093S0016	CIL0990S0115
CIL0938S0094														CIL1245S0043			CIL1231S0059	CIL1295S0026	CIL0310S0018
CIL0940S0063														CIL0912S0179			CIL1025S0007	CIL1330S0028	CIL1122S0062
CIL1157S0028														CIL1081S0023			CIL0974S0021	CIL0942S0154	CIL1501S0001
CIL1166S0044														CIL1076S0024			CIL0906S0020	CIL1100S0067	CIL1277S0017
CIL0225S0008														CIL0974S0052			CIL1076S0070	CIL1295S0012	CIL1020S0081
CIL0073S0006														CIL1002S0093			CIL0919S0128	CIL1086S0008	CIL0919S0011
CIL1050S0063														CIL1259S0004			CIL1028S0010	CIL0945S0082	CIL1403S0022
CIL0948S0066														CIL1187S0075			CIL1494S0056	CIL0962S0129	CIL0010S0035
CIL1240S0042														CIL1038S0113			CIL1025S0118	CIL1276S0022	CIL1144S0076
CIL1361S0023														CIL1034S0027			CIL0908S0001	CIL1231S0035	CIL0951S0076
CIL0921S0027														CIL1363S0031			CIL1192S0045	CIL1274S0059	CIL0148S0002
CIL1245S0001														CIL1405S0039			CIL0937S0160	CIL0990S0002	CIL1417S0112
CIL1141S0015														CIL1286S0052			CIL0929S0189	CIL1175S0057	CIL0922S0108
CIL1048S0090														CIL0990S0123			CIL1001S0082	CIL1385S0034	CIL1239S0024
CIL1167S0064														CIL0923S0165			CIL0893S0359	CIL0922S0086	CIL1446S0042
CIL1176S0048														CIL1021S0088			CIL0375S0001	CIL1318S0027	CIL1227S0029
CIL0895S0037														CIL1173S0062			CIL0925S0023	CIL0990S0179	CIL1197S0042
CIL1075S0009														CIL1596S0027			CIL1526S0041	CIL1446S0008	CIL0001S0013
CIL1137S0057														CIL0972S0112			CIL1503S0015	CIL1078S0066	CIL1047S0062
CIL0976S0085														CIL1032S0006			CIL0094S0019	CIL1057S0012	CIL1370S0022
CIL1348S0010														CIL0948S0153			CIL1525S0032	CIL0909S0179	CIL1456S0060
CIL0912S0107														CIL1308S0017			CIL1100S0112	CIL0919S0024	CIL0893S0177
CIL1335S0038														CIL1230S0031			CIL1043S0041	CIL1528S0039	CIL0893S0067
CIL0102S0006														CIL0010S0051			CIL1135S0062	CIL1385S0024	CIL0893S0053
CIL0982S0064														CIL1317S0080			CIL1422S0005	CIL0948S0018	CIL1207S0044
CIL1263S0005														CIL1048S0030			CIL0661S0001	CIL1066S0111	CIL1575S0025
CIL1064S0097														CIL1137S0006			CIL1025S0056	CIL1506S0015	CIL1076S0035
CIL1358S0007														CIL0929S0070			CIL0050S0008	CIL0218S0006	CIL1084S0073
CIL0244S0001														CIL1222S0028			CIL1400S0005	CIL1434S0029	CIL1173S0082
CIL1090S0093														CIL1215S0004			CIL0176S0042	CIL1032S0056	CIL0908S0103
CIL1166S0038														CIL0922S0170			CIL1452S0007	CIL1596S0045	CIL1596S0024
CIL0455S0015														CIL1193S0071			CIL0990S0063	CIL1382S0002	CIL0895S0209
CIL1572S0021														CIL1325S0002			CIL1562S0028	CIL0909S0241	CIL1157S0057
CIL1363S0054														CIL1279S0020			CIL1245S0041	CIL1325S0042	CIL0935S0027
CIL1100S0076														CIL1084S0057			CIL1317S0046	CIL0078S0011	CIL0984S0090
CIL1578S0025														CIL1231S0007			CIL1434S0030	CIL1077S0009	CIL1167S0055
CIL1340S0006														CIL1145S0149			CIL1133S0011	CIL1271S0049	CIL1429S0039
CIL0923S0074														CIL1151S0009			CIL0953S0097	CIL1032S0090	CIL1481S0027
CIL1578S0032														CIL1603S0022			CIL0970S0089	CIL1304S0026	CIL0897S0016
CIL0987S0112														CIL1577S0028			CIL0064S0031	CIL0953S0089	CIL1236S0021
CIL0001S0059														CIL1100S0036			CIL1138S0060	CIL1152S0033	CIL1336S0001
CIL1025S0137														CIL0100S0014			CIL1578S0019	CIL1506S0021	CIL0938S0053
CIL1107S0032														CIL0906S0030			CIL1313S0013	CIL1406S0005	CIL1057S0044
CIL0929S0011														CIL1370S0028			CIL0380S0001	CIL0938S0080	CIL1282S0045
CIL0922S0024														CIL1141S0018			CIL0050S0009	CIL1268S0028	CIL1486S0033
CIL0574S0001														CIL1184S0018			CIL0917S0138	CIL1575S0022	CIL0500S0001
CIL1099S0090														CIL0235S0013			CIL1219S0018	CIL0627S0004	CIL1126S0072
CIL0513S0002														CIL1531S0049			CIL0185S0013	CIL1237S0020	CIL0311S0013
CIL0031S0010														CIL0895S0157			CIL1387S0031	CIL0310S0024	CIL1076S0056
CIL1216S0016														CIL1427S0010			CIL0090S0015	CIL0600S0001	CIL1336S0021
CIL0099S0022														CIL1092S0033			CIL0957S0010	CIL0893S0388	CIL1204S0021
CIL0218S0019														CIL1499S0037			CIL1138S0059	CIL0489S0002	CIL1577S0014
CIL1205S0067														CIL1207S0075			CIL1021S0091	CIL1038S0115	CIL1135S0049
CIL1448S0019														CIL0978S0139			CIL0539S0006	CIL1126S0051	CIL0925S0071
CIL0061S0008														CIL1173S0009			CIL1520S0047	CIL1126S0024	CIL1158S0043
CIL1142S0015														CIL0967S0136			CIL1082S0106	CIL0906S0160	CIL1101S0105
CIL0466S0003														CIL1196S0060			CIL1573S0008	CIL0262S0010	CIL0002S0043
CIL1192S0071														CIL0972S0105			CIL1242S0022	CIL0929S0138	CIL0921S0076
CIL0189S0014														CIL1176S0047			CIL1047S0016	CIL1461S0011	CIL1068S0098
CIL1446S0055														CIL1505S0027			CIL1071S0038	CIL0203S0002	CIL0212S0013
CIL1084S0066														CIL0929S0086			CIL0970S0100	CIL0177S0010	CIL1118S0009
CIL1332S0026														CIL0019S0001			CIL0344S0024	CIL1136S0071	CIL1151S0022
CIL0967S0049														CIL1282S0037			CIL1171S0008	CIL1591S0008	CIL0962S0118
CIL1539S0005														CIL0942S0025			CIL0120S0021	CIL1090S0028	CIL0293S0012
CIL0919S0092														CIL1416S0027			CIL1107S0024	CIL1479S0028	CIL0266S0007
CIL1358S0055														CIL0893S0223			CIL1133S0031	CIL1268S0007	CIL1420S0021
CIL0073S0020														CIL1552S0024			CIL1303S0050	CIL0163S0005	CIL1134S0025
CIL1595S0047														CIL1078S0052			CIL1003S0032	CIL1290S0023	CIL1175S0035
CIL0902S0167														CIL0953S0064			CIL0942S0142	CIL1436S0022	CIL0922S0193
CIL1060S0065														CIL1152S0047			CIL1192S0073	CIL0271S0003	CIL1336S0004
CIL1018S0116														CIL0923S0003			CIL1015S0073	CIL1298S0022	CIL1030S0142
CIL1147S0032														CIL0940S0176			CIL1405S0083	CIL1112S0021	CIL0149S0014
CIL1584S0004														CIL1436S0043			CIL0824S0001	CIL1101S0025	CIL0921S0052
CIL1400S0040														CIL1295S0077			CIL0460S0001	CIL1452S0013	CIL1057S0065
CIL1546S0049														CIL1092S0053			CIL0893S0019	CIL1512S0032	CIL0996S0063
CIL1264S0016														CIL1032S0070			CIL1107S0046	CIL1161S0026	CIL0091S0001
CIL1173S0039														CIL0990S0008			CIL1196S0093	CIL0990S0060	CIL1476S0037
CIL1047S0129														CIL0906S0075			CIL1021S0089	CIL1300S0073	CIL1508S0018
CIL0922S0067														CIL0902S0041			CIL0554S0002	CIL1057S0008	CIL1459S0024
CIL0919S0202														CIL0938S0134			CIL0935S0061	CIL0895S0106	CIL0929S0094
CIL1071S0026														CIL1266S0026			CIL1082S0116	CIL1099S0035	CIL1454S0040
CIL1082S0053														CIL1372S0029			CIL0978S0088	CIL1025S0094	CIL1060S0019
CIL1056S0013														CIL1133S0057			CIL0766S0001	CIL1182S0027	CIL0068S0008
CIL1053S0017														CIL1386S0037			CIL1380S0015	CIL1515S0030	CIL0940S0187
CIL1145S0080														CIL1110S0011			CIL1479S0014	CIL0957S0144	CIL1107S0014
CIL0929S0113														CIL1138S0089			CIL0031S0002	CIL1369S0010	CIL0948S0199
CIL1119S0064														CIL1264S0053			CIL0909S0064	CIL0946S0130	CIL1066S0056
CIL1053S0023														CIL1319S0020			CIL1263S0077	CIL1077S0002	CIL0919S0181
CIL0974S0078														CIL1093S0048			CIL1001S0030	CIL1127S0080	CIL1056S0003
CIL1130S0014														CIL1276S0023			CIL0218S0026	CIL0908S0113	CIL0990S0166
CIL1092S0049														CIL1592S0009			CIL1216S0047	CIL1467S0029	CIL0136S0005
CIL0064S0042														CIL0921S0047			CIL1048S0005	CIL0937S0099	CIL0452S0002
CIL1081S0025														CIL1136S0049			CIL0984S0053	CIL1297S0036	CIL1192S0062
CIL0456S0001														CIL0993S0023			CIL0946S0121	CIL0360S0005	CIL0967S0161
CIL1143S0012														CIL0976S0090			CIL1546S0024	CIL1089S0067	CIL0922S0151
CIL0938S0101														CIL1520S0054			CIL1297S0034	CIL0948S0098	CIL0158S0002
CIL1190S0002														CIL1204S0038			CIL0316S0009	CIL0438S0008	CIL1242S0015
CIL1009S0070														CIL1328S0058			CIL1512S0014	CIL1207S0071	CIL1294S0021
CIL1155S0031														CIL1185S0022			CIL1146S0058	CIL1508S0024	CIL1505S0017
CIL1577S0042														CIL1093S0125			CIL0895S0180	CIL1429S0011	CIL1265S0061
CIL0203S0027														CIL1242S0014			CIL0263S0008	CIL1596S0040	CIL1319S0024
CIL0922S0180														CIL1127S0067			CIL0385S0001	CIL0976S0126	CIL1133S0042
CIL1465S0007														CIL0325S0001			CIL1211S0014	CIL1336S0038	CIL0925S0029
CIL1192S0065														CIL1226S0045			CIL1047S0055	CIL1119S0082	CIL1229S0064
CIL0176S0003														CIL1146S0022			CIL1152S0028	CIL1064S0015	CIL1541S0024
CIL1107S0047														CIL0895S0199			CIL1584S0014	CIL0902S0199	CIL1132S0008
CIL1444S0041														CIL1076S0101			CIL0010S0030	CIL1312S0017	CIL1226S0014
CIL1157S0007														CIL1084S0090			CIL0156S0013	CIL1353S0025	CIL1002S0048
CIL1320S0009														CIL0183S0014			CIL1112S0042	CIL0178S0001	CIL0893S0345
CIL1175S0046														CIL1263S0078			CIL0211S0017	CIL1136S0083	CIL0134S0009
CIL1443S0029														CIL1268S0070			CIL0073S0015	CIL1105S0035	CIL0948S0056
CIL1146S0047														CIL1113S0007			CIL0064S0033	CIL0150S0004	CIL1515S0031
CIL1555S0029														CIL1254S0009			CIL0049S0016	CIL1104S0018	CIL1151S0021
CIL1497S0001														CIL0972S0054			CIL0940S0191	CIL1553S0023	CIL1078S0105
CIL1025S0092														CIL1127S0026			CIL0895S0067	CIL1037S0029	CIL1598S0024
CIL0106S0006														CIL0909S0130			CIL1400S0022	CIL1012S0013	CIL1259S0038
CIL1012S0114														CIL0951S0044			CIL1443S0027	CIL1525S0019	CIL0940S0059
CIL1216S0026														CIL0895S0071			CIL1596S0016	CIL1599S0013	CIL0176S0046
CIL1118S0035														CIL1094S0016			CIL0925S0132	CIL0895S0005	CIL0897S0072
CIL1145S0068														CIL1264S0003			CIL1160S0001	CIL0344S0014	CIL1549S0032
CIL0203S0025														CIL1221S0011			CIL1304S0022	CIL1172S0067	CIL1138S0087
CIL1122S0051														CIL1424S0002			CIL0953S0026	CIL1607S0032	CIL1087S0082
CIL1383S0004														CIL1134S0038			CIL1101S0031	CIL0424S0009	CIL1399S0004
CIL1003S0079														CIL1300S0053			CIL0133S0003	CIL0112S0001	CIL1137S0056
CIL1126S0034														CIL1417S0053			CIL0595S0001	CIL1371S0041	CIL1178S0009
CIL1047S0031														CIL1012S0047			CIL1173S0084	CIL1104S0039	CIL1484S0012
CIL1040S0069														CIL1182S0016			CIL1018S0027	CIL1372S0022	CIL1295S0055
CIL1076S0069														CIL1113S0053			CIL1209S0002	CIL1467S0040	CIL1126S0075
CIL1492S0029														CIL0897S0131			CIL1330S0049	CIL1063S0052	CIL1378S0002
CIL0461S0011														CIL1081S0063			CIL1184S0059	CIL1242S0028	CIL1268S0041
CIL1505S0012														CIL1149S0009			CIL0993S0057	CIL1527S0023	CIL1197S0003
CIL0923S0028														CIL0134S0016			CIL1061S0113	CIL1153S0046	CIL1383S0006
CIL1071S0043														CIL0893S0438			CIL1266S0042	CIL0914S0112	CIL0990S0040
CIL1197S0011														CIL0902S0014			CIL0906S0081	CIL0923S0133	CIL1020S0043
CIL0311S0008														CIL1346S0007			CIL0914S0031	CIL1057S0078	CIL0009S0027
CIL0972S0098														CIL1169S0042			CIL1204S0027	CIL1196S0038	CIL0064S0023
CIL0974S0043														CIL1031S0078			CIL0895S0134	CIL0996S0085	CIL1187S0036
CIL0940S0039														CIL1164S0064			CIL0895S0068	CIL0899S0061	CIL1456S0056
CIL1031S0024														CIL1305S0025			CIL1266S0041	CIL0992S0110	CIL1015S0003
CIL1146S0046														CIL1077S0018			CIL1068S0007	CIL1031S0141	CIL1348S0026
CIL0923S0076														CIL1136S0086			CIL1110S0070	CIL1095S0065	CIL1006S0096
CIL1145S0144														CIL0970S0071			CIL1155S0062	CIL1273S0004	CIL0465S0012
CIL1155S0016														CIL1082S0095			CIL0718S0001	CIL1417S0054	CIL1038S0027
CIL1318S0007														CIL1367S0010			CIL1391S0007	CIL0987S0096	CIL1468S0019
CIL0027S0007														CIL0338S0015			CIL0747S0001	CIL1253S0051	CIL1064S0105
CIL1038S0083														CIL0354S0007			CIL1060S0106	CIL1154S0036	CIL1029S0042
CIL0010S0054														CIL0945S0059			CIL1293S0031	CIL1051S0011	CIL1343S0034
CIL1126S0085														CIL1076S0083			CIL1082S0009	CIL0923S0043	CIL1133S0003
CIL1486S0003														CIL1110S0087			CIL1021S0110	CIL0945S0133	CIL0893S0180
CIL0010S0058														CIL1147S0027			CIL0893S0192	CIL0364S0013	CIL1447S0020
CIL1130S0012														CIL1384S0056			CIL1164S0089	CIL1101S0012	CIL0893S0186
CIL1246S0139														CIL1047S0101			CIL1021S0048	CIL0923S0153	CIL0566S0001
CIL1003S0037														CIL1325S0024			CIL1043S0072	CIL1263S0024	CIL1456S0019
CIL1056S0045														CIL0893S0128			CIL1167S0070	CIL1256S0043	CIL1030S0096
CIL1118S0060														CIL1358S0058			CIL1416S0074	CIL1032S0131	CIL1348S0035
CIL0962S0110														CIL1539S0020			CIL1303S0021	CIL1402S0041	CIL1607S0017
CIL0942S0104														CIL1193S0082			CIL0286S0006	CIL0982S0088	CIL1216S0018
CIL1081S0005														CIL1547S0032			CIL0929S0145	CIL1099S0094	CIL1057S0092
CIL1146S0036														CIL0021S0007			CIL0970S0090	CIL0923S0004	CIL0908S0013
CIL1009S0042														CIL1515S0051			CIL0009S0039	CIL0929S0139	CIL1025S0018
CIL0967S0088														CIL0118S0014			CIL0912S0112	CIL0976S0029	CIL1147S0098
CIL1142S0033														CIL1031S0149			CIL0756S0001	CIL1527S0019	CIL1221S0029
CIL0114S0028														CIL1128S0017			CIL1294S0020	CIL0982S0131	CIL0002S0004
CIL1386S0024														CIL1153S0090			CIL1094S0018	CIL1436S0036	CIL1268S0017
CIL0441S0005														CIL1136S0022			CIL0002S0011	CIL0656S0002	CIL1386S0022
CIL0437S0010														CIL1092S0113			CIL0035S0024	CIL1203S0023	CIL1166S0014
CIL1484S0001														CIL1142S0035			CIL1135S0026	CIL1485S0012	CIL1006S0045
CIL1102S0070														CIL1291S0014			CIL0946S0104	CIL0982S0062	CIL1277S0064
CIL0893S0092														CIL1286S0045			CIL1153S0048	CIL1604S0020	CIL1171S0034
CIL1264S0020														CIL1582S0007			CIL0942S0016	CIL0381S0002	CIL0976S0038
CIL1155S0005														CIL0957S0117			CIL0301S0008	CIL1246S0140	CIL0979S0077
CIL1184S0023														CIL0922S0022			CIL0922S0031	CIL0996S0108	CIL1104S0042
CIL0202S0006														CIL1081S0080			CIL0967S0153	CIL1023S0019	CIL1259S0077
CIL1081S0076														CIL0644S0013			CIL1190S0057	CIL1038S0132	CIL0149S0012
CIL1231S0061														CIL0312S0003			CIL1182S0048	CIL0222S0009	CIL1210S0024
CIL0899S0159														CIL1023S0031			CIL0316S0004	CIL1099S0092	CIL0895S0227
CIL1417S0079														CIL1071S0045			CIL0948S0106	CIL1338S0012	CIL1607S0024
CIL1015S0060														CIL1230S0004			CIL1525S0052	CIL1155S0012	CIL1192S0020
CIL1396S0007														CIL1246S0089			CIL0942S0124	CIL1107S0050	CIL1447S0006
CIL1219S0071														CIL1056S0067			CIL1095S0054	CIL0073S0005	CIL1127S0040
CIL0990S0163														CIL1196S0022			CIL1147S0111	CIL0418S0001	CIL0912S0031
CIL0923S0193														CIL1189S0016			CIL1147S0116	CIL0441S0006	CIL1003S0146
CIL1263S0013														CIL1037S0010			CIL1219S0093	CIL1143S0099	CIL1030S0116
CIL0070S0012														CIL1538S0008			CIL1537S0017	CIL0521S0001	CIL1075S0063
CIL1501S0025														CIL1040S0091			CIL1344S0022	CIL0938S0149	CIL0912S0055
CIL0440S0005														CIL1531S0053			CIL1068S0022	CIL1551S0019	CIL1524S0004
CIL1055S0019														CIL1146S0040			CIL0987S0170	CIL1319S0019	CIL1429S0021
CIL0094S0032														CIL0436S0009			CIL0940S0022	CIL1416S0076	CIL1132S0068
CIL1417S0074														CIL1512S0009			CIL1134S0080	CIL1050S0017	CIL1325S0059
CIL0773S0001														CIL0945S0055			CIL1175S0011	CIL1093S0088	CIL1499S0043
CIL0937S0149														CIL0101S0013			CIL1381S0022	CIL1407S0018	CIL1015S0061
CIL0018S0024														CIL0945S0060			CIL1162S0008	CIL0940S0197	CIL0970S0098
CIL1204S0057														CIL1506S0019			CIL1134S0081	CIL0510S0005	CIL1201S0016
CIL0037S0027														CIL0978S0109			CIL0150S0014	CIL0946S0105	CIL1175S0069
CIL1190S0049														CIL0895S0200			CIL0056S0001	CIL1305S0027	CIL1543S0012
CIL0957S0162														CIL0948S0108			CIL0490S0003	CIL1180S0063	CIL1569S0016
CIL1403S0029														CIL0948S0134			CIL0086S0018	CIL1086S0066	CIL0331S0001
CIL1555S0040														CIL1089S0030			CIL0962S0019	CIL0079S0013	CIL1361S0003
CIL0957S0183														CIL1139S0032			CIL1564S0047	CIL1147S0014	CIL1324S0020
CIL1173S0036														CIL0143S0003			CIL1216S0100	CIL1167S0001	CIL0324S0014
CIL1132S0070														CIL0921S0089			CIL0940S0100	CIL1153S0079	CIL1215S0058
CIL0455S0011														CIL1591S0009			CIL0069S0001	CIL0893S0440	CIL1230S0089
CIL1154S0049														CIL0098S0006			CIL1508S0022	CIL0106S0015	CIL1078S0102
CIL1525S0041														CIL0782S0015			CIL1002S0073	CIL0982S0019	CIL0420S0007
CIL0979S0180														CIL1239S0018			CIL1110S0019	CIL0982S0149	CIL1076S0055
CIL0902S0056														CIL1354S0043			CIL0942S0151	CIL0914S0011	CIL0359S0027
CIL1439S0003														CIL1055S0053				CIL1165S0034	CIL0942S0234
CIL1152S0015														CIL1209S0024				CIL1582S0024	CIL0215S0012
CIL0450S0015														CIL1294S0010				CIL1048S0004	CIL1102S0066
CIL0486S0002														CIL1463S0006				CIL1078S0045	CIL1207S0012
CIL0917S0114														CIL0914S0096				CIL0283S0009	CIL1190S0053
CIL1348S0031														CIL0938S0098				CIL1473S0005	CIL1110S0053
CIL0912S0039														CIL1155S0055				CIL1582S0030	CIL1084S0022
CIL0989S0077														CIL1057S0024				CIL0945S0080	CIL0267S0014
CIL1318S0013														CIL1122S0098				CIL0370S0007	CIL0925S0100
CIL1153S0060														CIL1100S0044				CIL0902S0117	CIL0146S0011
CIL1060S0002														CIL0155S0003				CIL1147S0108	CIL0967S0061
CIL1087S0017														CIL0998S0026				CIL1201S0024	CIL1463S0024
CIL0982S0145														CIL1232S0049				CIL1259S0009	CIL1619S0010
CIL1294S0048														CIL0377S0002				CIL1409S0033	CIL1066S0079
CIL0937S0112														CIL1145S0083				CIL1164S0049	CIL1003S0034
CIL1047S0141														CIL1055S0013				CIL0987S0026	CIL1282S0019
CIL0922S0028														CIL1055S0075				CIL0909S0055	CIL0004S0018
CIL1384S0061														CIL0037S0036				CIL0921S0100	CIL0006S0003
CIL0893S0313														CIL1354S0054				CIL1023S0052	CIL1608S0011
CIL1192S0050														CIL1057S0034				CIL1134S0050	CIL1126S0110
CIL1313S0047														CIL1465S0019				CIL0953S0090	CIL1552S0039
CIL1316S0027														CIL1055S0077				CIL0919S0008	CIL1102S0067
CIL1506S0008														CIL1128S0050				CIL0546S0001	CIL1449S0020
CIL0897S0130														CIL0384S0004				CIL0222S0001	CIL0358S0015
CIL1452S0017														CIL0978S0013				CIL1263S0087	CIL1277S0007
CIL1211S0019														CIL0993S0024				CIL0922S0178	CIL0909S0093
CIL1020S0040														CIL1064S0129				CIL1138S0083	CIL1157S0068
CIL0893S0370														CIL0922S0188				CIL0291S0001	CIL0953S0036
CIL0976S0088														CIL1535S0003				CIL0982S0067	CIL0259S0019
CIL1032S0044														CIL0086S0013				CIL0102S0001	CIL1351S0007
CIL0987S0017														CIL1303S0032				CIL1028S0084	CIL0989S0043
CIL1156S0024														CIL0123S0003				CIL1031S0068	CIL1180S0024
CIL0938S0102														CIL0458S0002				CIL1093S0111	CIL1277S0018
CIL1242S0046														CIL0929S0053				CIL0099S0008	CIL1300S0057
CIL1326S0020														CIL1133S0028				CIL0923S0188	CIL0935S0079
CIL0533S0003														CIL1400S0025				CIL0318S0006	CIL1294S0016
CIL1037S0055														CIL1040S0030				CIL0349S0004	CIL1047S0142
CIL1246S0048														CIL1190S0021				CIL1153S0099	CIL0987S0157
CIL1056S0011														CIL0948S0104				CIL1492S0020	CIL0893S0269
CIL1119S0071														CIL0213S0013				CIL0978S0120	CIL0010S0017
CIL1416S0004														CIL1229S0069				CIL1060S0061	CIL1332S0049
CIL0938S0087														CIL0935S0114				CIL0166S0009	CIL1084S0095
CIL1508S0023														CIL0990S0022				CIL1093S0094	CIL0942S0164
CIL1171S0048														CIL0967S0209				CIL1110S0060	CIL0948S0224
CIL1447S0022														CIL1029S0026				CIL1131S0019	CIL0990S0018
CIL1113S0067														CIL1312S0050				CIL1372S0017	CIL0132S0008
CIL0957S0103														CIL1157S0031				CIL0906S0022	CIL1503S0033
CIL0340S0001														CIL0993S0011				CIL0974S0020	CIL1147S0066
CIL1113S0059														CIL0272S0001				CIL0701S0001	CIL1032S0138
CIL1579S0020														CIL1119S0050				CIL1295S0001	CIL1541S0018
CIL0136S0003														CIL1400S0041				CIL1171S0018	CIL1295S0016
CIL1018S0095														CIL0633S0001				CIL0921S0018	CIL0091S0006
CIL0945S0069														CIL0644S0017				CIL1481S0001	CIL1500S0053
CIL1075S0048														CIL1193S0042				CIL0123S0007	CIL1369S0022
CIL1021S0023														CIL1271S0015				CIL0996S0094	CIL0923S0067
CIL0114S0029														CIL0409S0006				CIL1230S0082	CIL0984S0120
CIL0902S0152														CIL1151S0053				CIL0025S0015	CIL1076S0028
CIL1100S0027														CIL1298S0049				CIL0168S0004	CIL0925S0054
CIL1100S0049														CIL1032S0042				CIL1009S0002	CIL0116S0001
CIL1262S0043														CIL1373S0001				CIL1149S0036	CIL0979S0120
CIL1310S0055														CIL1324S0009				CIL1347S0031	CIL0919S0140
CIL1146S0053														CIL1372S0031				CIL1130S0047	CIL1551S0002
CIL0976S0084														CIL1481S0012				CIL0996S0075	CIL0984S0085
CIL1094S0053														CIL1336S0029				CIL1032S0088	CIL1204S0022
CIL0893S0350														CIL0183S0017				CIL0009S0022	CIL0989S0050
CIL0948S0008														CIL1402S0021				CIL1021S0046	CIL1333S0030
CIL1030S0084														CIL0893S0100				CIL0908S0071	CIL1219S0078
CIL1268S0042														CIL1009S0028				CIL1479S0015	CIL0908S0172
CIL1564S0056														CIL0134S0012				CIL0171S0004	CIL0990S0139
CIL1343S0049														CIL0895S0163				CIL1582S0029	CIL0919S0058
CIL1181S0047														CIL1228S0029				CIL1173S0076	CIL1169S0007
CIL1099S0064														CIL1332S0021				CIL0606S0004	CIL1197S0085
CIL1197S0013														CIL0948S0140				CIL1310S0011	CIL1031S0150
CIL1386S0028														CIL1001S0018				CIL0925S0124	CIL1559S0005
CIL0156S0011														CIL1348S0038				CIL1009S0003	CIL1219S0030
CIL1449S0019														CIL1113S0027				CIL0009S0018	CIL1320S0041
CIL1133S0007														CIL0946S0124				CIL0982S0124	CIL0909S0161
CIL1082S0099														CIL1003S0109				CIL1444S0009	CIL0922S0141
CIL1417S0106														CIL1416S0026				CIL0962S0128	CIL1486S0030
CIL1244S0004														CIL1112S0099				CIL1147S0093	CIL0957S0069
CIL1330S0011														CIL0065S0001				CIL0090S0037	CIL1122S0091
CIL0364S0004														CIL1078S0099				CIL1001S0081	CIL1242S0076
CIL1064S0016														CIL0982S0027				CIL1018S0021	CIL1459S0032
CIL1568S0035														CIL1136S0059				CIL1101S0015	CIL1047S0130
CIL0059S0009														CIL1240S0021				CIL0982S0130	CIL1078S0017
CIL1263S0080														CIL0217S0001				CIL1262S0003	CIL1078S0022
CIL1568S0027														CIL1086S0068				CIL0489S0006	CIL1096S0026
CIL0948S0012														CIL1086S0103				CIL0940S0021	CIL1003S0149
CIL0121S0020														CIL1232S0053				CIL1488S0030	CIL1102S0098
CIL1507S0011														CIL1040S0013				CIL0528S0004	CIL1148S0031
CIL0972S0034														CIL0436S0010				CIL1056S0037	CIL1549S0034
CIL1325S0004														CIL1212S0037				CIL1075S0059	CIL0948S0156
CIL0120S0014														CIL0002S0040				CIL1012S0004	CIL0979S0025
CIL0385S0028														CIL0951S0135				CIL1274S0039	CIL1231S0001
CIL0198S0013														CIL0897S0089				CIL0155S0010	CIL1413S0002
CIL0207S0021														CIL1136S0023				CIL1193S0044	CIL0935S0047
CIL0942S0144														CIL1289S0015				CIL1179S0009	CIL1568S0034
CIL1293S0070														CIL1422S0026				CIL0893S0105	CIL1216S0022
CIL0938S0007														CIL1187S0009				CIL1525S0036	CIL1579S0014
CIL1488S0019														CIL1545S0017				CIL1032S0107	CIL1061S0063
CIL1180S0051														CIL1152S0048				CIL1066S0034	CIL0990S0086
CIL1198S0018														CIL1468S0020				CIL1460S0014	CIL1023S0020
CIL1061S0056														CIL0203S0006				CIL0976S0124	CIL0895S0048
CIL1445S0029														CIL1277S0063				CIL0064S0002	CIL1524S0012
CIL0945S0162														CIL1459S0033				CIL0897S0163	CIL1323S0045
CIL0946S0110														CIL1499S0017				CIL1582S0028	CIL1366S0011
CIL1153S0066														CIL0967S0155				CIL1051S0058	CIL0942S0014
CIL1169S0017														CIL1018S0092				CIL1095S0036	CIL1237S0015
CIL1520S0049														CIL1336S0011				CIL1449S0029	CIL0972S0007
CIL1607S0037														CIL0431S0004				CIL0982S0132	CIL1175S0077
CIL0922S0040														CIL1604S0013				CIL1025S0041	CIL1037S0097
CIL1340S0010														CIL0782S0007				CIL0951S0129	CIL1147S0075
CIL1259S0030														CIL1405S0007				CIL1032S0052	CIL0957S0066
CIL0073S0028														CIL1209S0015				CIL1310S0004	CIL1142S0011
CIL1553S0011														CIL0251S0005				CIL1153S0130	CIL0129S0009
CIL0902S0007														CIL0990S0151				CIL1087S0075	CIL1096S0009
CIL0919S0074														CIL1166S0005				CIL0993S0065	CIL0293S0015
CIL1550S0009														CIL0967S0104				CIL1218S0037	CIL0312S0014
CIL1619S0015														CIL0929S0039				CIL0282S0006	CIL1001S0044
CIL0993S0078														CIL1502S0001				CIL0160S0021	CIL1578S0011
CIL1320S0011														CIL1378S0029				CIL1463S0028	CIL1018S0118
CIL1464S0044														CIL1060S0003				CIL1076S0005	CIL0923S0014
CIL1325S0081														CIL1071S0073				CIL0942S0178	CIL1090S0072
CIL0972S0050														CIL1351S0015				CIL0390S0005	CIL1038S0036
CIL0284S0009														CIL0938S0004				CIL1429S0004	CIL1298S0050
CIL1082S0124														CIL0131S0032				CIL1456S0058	CIL1037S0049
CIL0967S0072														CIL0919S0050				CIL0909S0238	CIL1607S0013
CIL0982S0007														CIL0516S0003				CIL0945S0083	CIL1216S0001
CIL1006S0066														CIL1165S0012				CIL1098S0003	CIL0990S0059
CIL1055S0086														CIL1358S0021				CIL0940S0093	CIL1152S0041
CIL1145S0071														CIL0948S0014				CIL1303S0052	CIL1429S0044
CIL0948S0127														CIL1210S0014				CIL1076S0018	CIL0271S0010
CIL1347S0023														CIL1245S0031				CIL0902S0108	CIL1484S0018
CIL0982S0039														CIL0923S0242				CIL1092S0058	CIL0359S0018
CIL0919S0230														CIL1411S0019				CIL1539S0001	CIL0993S0093
CIL0919S0183														CIL0948S0095				CIL1153S0050	CIL1176S0063
CIL0929S0216														CIL1048S0025				CIL1220S0035	CIL1439S0032
CIL1169S0030														CIL0957S0101				CIL1466S0003	CIL0922S0055
CIL1240S0015														CIL0089S0007				CIL1201S0025	CIL1393S0048
CIL1343S0030														CIL1339S0008				CIL1047S0045	CIL1326S0032
CIL0979S0125														CIL1493S0029				CIL1126S0112	CIL0098S0001
CIL1271S0009														CIL0396S0007				CIL1515S0001	CIL1218S0050
CIL0998S0115														CIL1147S0008				CIL0923S0272	CIL1030S0145
CIL0957S0174														CIL1050S0080				CIL1034S0069	CIL1154S0052
CIL0937S0104														CIL1154S0021				CIL1048S0091	CIL0921S0116
CIL1312S0028														CIL0972S0045				CIL1245S0010	CIL0909S0187
CIL1198S0030														CIL0998S0063				CIL0438S0006	CIL1006S0098
CIL1071S0015														CIL1317S0068				CIL1378S0039	CIL1061S0089
CIL0176S0014														CIL0246S0015				CIL1298S0005	CIL1244S0011
CIL1090S0004														CIL1063S0079				CIL1155S0063	CIL1258S0024
CIL0893S0109														CIL0978S0135				CIL1372S0012	CIL1471S0031
CIL1564S0046														CIL1218S0027				CIL1283S0010	CIL0945S0018
CIL1055S0034														CIL0962S0139				CIL1337S0005	CIL0902S0092
CIL0974S0056														CIL1071S0005				CIL1573S0006	CIL0982S0154
CIL1048S0066														CIL0893S0136				CIL1107S0067	CIL1298S0023
CIL1479S0017														CIL1235S0013				CIL1259S0061	CIL1326S0009
CIL0897S0015														CIL1187S0092				CIL1393S0001	CIL1015S0038
CIL0897S0009														CIL1393S0064				CIL1456S0080	CIL1463S0018
CIL0908S0080														CIL1153S0065				CIL1029S0004	CIL1043S0061
CIL1146S0030														CIL1176S0037				CIL1131S0101	CIL0465S0004
CIL1141S0014														CIL0046S0022				CIL0015S0006	CIL1218S0043
CIL1025S0138														CIL0074S0012				CIL0118S0008	CIL1185S0018
CIL1594S0015														CIL1501S0032				CIL1456S0079	CIL1263S0025
CIL1390S0039														CIL1505S0041				CIL1087S0077	CIL1251S0005
CIL0246S0017														CIL1265S0045				CIL0893S0017	CIL0929S0183
CIL1317S0086														CIL1028S0065				CIL0220S0005	CIL1184S0060
CIL1520S0055														CIL1201S0040				CIL0268S0006	CIL1436S0045
CIL0121S0011														CIL1207S0015				CIL0284S0014	CIL1271S0030
CIL0345S0002														CIL1220S0033				CIL0336S0005	CIL0893S0001
CIL1468S0007														CIL0207S0010				CIL0394S0014	CIL0922S0137
CIL0967S0022														CIL0906S0097				CIL0527S0002	CIL1147S0026
CIL1023S0023														CIL0090S0016				CIL0748S0001	CIL1453S0011
CIL1196S0056														CIL1122S0013				CIL0906S0046	CIL0970S0112
CIL0942S0204														CIL1239S0034				CIL0940S0014	CIL0929S0182
CIL0982S0122														CIL1037S0066				CIL0998S0119	CIL0120S0015
CIL1333S0014														CIL1227S0040				CIL1025S0064	CIL1324S0040
CIL0970S0126														CIL0424S0003				CIL1132S0003	CIL1093S0026
CIL1468S0030														CIL0945S0106				CIL1172S0012	CIL1094S0065
CIL1557S0020														CIL1036S0002				CIL1185S0047	CIL1157S0065
CIL1102S0032														CIL0992S0069				CIL1231S0077	CIL1549S0007
CIL1105S0012														CIL1152S0009				CIL1256S0009	CIL0962S0143
CIL0909S0030														CIL1239S0009				CIL1276S0017	CIL1582S0033
CIL1218S0038														CIL0437S0004				CIL1378S0040	CIL1482S0027
CIL0970S0031														CIL1156S0087				CIL1577S0001	CIL1396S0003
CIL1061S0114														CIL1253S0048					CIL0984S0044
CIL1009S0105														CIL0027S0002					CIL1495S0027
CIL1147S0031														CIL1531S0016					CIL1047S0143
CIL0626S0001														CIL1020S0080					CIL0967S0010
CIL0899S0133														CIL1417S0045					CIL0301S0006
CIL0923S0125														CIL1446S0027					CIL0938S0048
CIL1533S0017														CIL0006S0006					CIL1086S0062
CIL0197S0004														CIL1417S0080					CIL1359S0006
CIL1015S0010														CIL0508S0002					CIL1187S0015
CIL1306S0047														CIL1221S0002					CIL1602S0004
CIL1384S0043														CIL0967S0221					CIL0922S0206
CIL1006S0042														CIL1100S0069					CIL1220S0037
CIL1294S0083														CIL0925S0140					CIL1579S0023
CIL1101S0024														CIL0895S0028					CIL1370S0020
CIL1030S0151														CIL1358S0015					CIL1444S0005
CIL0359S0022														CIL0380S0015					CIL1332S0040
CIL0258S0009														CIL1025S0103					CIL1448S0006
CIL0302S0015														CIL1499S0026					CIL0962S0040
CIL1324S0018														CIL1425S0027					CIL1142S0004
CIL0391S0004														CIL1018S0019					CIL1190S0054
CIL1158S0084														CIL1136S0019					CIL1110S0055
CIL0134S0015														CIL1515S0010					CIL1372S0034
CIL0473S0005														CIL0962S0140					CIL0946S0052
CIL0984S0037														CIL1076S0049					CIL1555S0054
CIL1352S0017														CIL1145S0047					CIL1145S0162
CIL1263S0067														CIL1273S0038					CIL1273S0059
CIL1204S0066														CIL1043S0067					CIL1020S0069
CIL1218S0010														CIL1371S0073					CIL1047S0065
CIL0120S0001														CIL1020S0105					CIL1087S0035
CIL0135S0020														CIL1254S0059					CIL1253S0001
CIL1454S0015														CIL1438S0009					CIL0895S0167
CIL0188S0004														CIL0923S0095					CIL1037S0050
CIL1149S0053														CIL1231S0062					CIL0923S0091
CIL0782S0030														CIL0970S0102					CIL0893S0364
CIL1470S0006														CIL0974S0036					CIL1341S0039
CIL1274S0006														CIL1135S0069					CIL1081S0027
CIL1055S0129														CIL1291S0010					CIL0946S0106
CIL1386S0002														CIL1029S0021					CIL0207S0017
CIL0942S0163														CIL0921S0048					CIL1370S0030
CIL1006S0084														CIL1244S0008					CIL1482S0008
CIL1099S0091														CIL1166S0002					CIL1390S0009
CIL1467S0034														CIL0895S0092					CIL1126S0059
CIL1076S0008														CIL0996S0048					CIL0912S0082
CIL0967S0125														CIL1182S0013					CIL1192S0064
CIL0893S0392														CIL0925S0092					CIL1197S0080
CIL1506S0025														CIL1341S0023					CIL1048S0080
CIL0919S0091														CIL1602S0026					CIL1138S0010
CIL0893S0377														CIL1290S0026					CIL0046S0008
CIL1215S0012														CIL0143S0006					CIL1021S0011
CIL0311S0002														CIL0238S0001					CIL1143S0032
CIL1459S0022														CIL1032S0009					CIL0967S0176
CIL0979S0108														CIL0906S0140					CIL1068S0062
CIL1113S0055														CIL1048S0002					CIL1374S0025
CIL1263S0100														CIL0618S0002					CIL1323S0041
CIL1216S0072														CIL0895S0114					CIL1084S0003
CIL0187S0006														CIL1084S0059					CIL1515S0042
CIL0893S0188														CIL1235S0004					CIL1230S0063
CIL1135S0027														CIL1228S0044					CIL1092S0073
CIL0972S0110														CIL0912S0095					CIL1404S0010
CIL1294S0005														CIL1354S0019					CIL0152S0008
CIL1157S0056														CIL1249S0001					CIL0608S0002
CIL1348S0007														CIL1228S0004					CIL1371S0053
CIL1205S0016														CIL1038S0024					CIL0895S0085
CIL0948S0115														CIL1158S0095					CIL0914S0095
CIL1534S0007														CIL0921S0088					CIL1335S0012
CIL1082S0041														CIL0938S0145					CIL1133S0030
CIL1466S0011														CIL1224S0002					CIL1294S0031
CIL1588S0006														CIL0026S0020					CIL1009S0088
CIL1145S0095														CIL1342S0005					CIL0158S0013
CIL1031S0105														CIL0266S0004					CIL1032S0024
CIL1118S0033														CIL1102S0048					CIL1245S0062
CIL1219S0002														CIL1541S0013					CIL1198S0045
CIL1198S0038														CIL1568S0031					CIL1249S0040
CIL1324S0017														CIL1119S0010					CIL1396S0021
CIL1253S0037														CIL0953S0010					CIL0929S0058
CIL1032S0054														CIL1264S0044					CIL1276S0030
CIL1294S0029														CIL1324S0066					CIL1403S0024
CIL0112S0007														CIL0120S0022					CIL1132S0014
CIL0951S0139														CIL0897S0173					CIL1358S0043
CIL0026S0019														CIL1131S0022					CIL1047S0089
CIL0912S0078														CIL0908S0124					CIL1391S0026
CIL0177S0020														CIL1133S0061					CIL1131S0083
CIL1297S0012														CIL1112S0105					CIL1446S0057
CIL0134S0028														CIL1141S0030					CIL1429S0007
CIL1131S0029														CIL1112S0032					CIL1520S0006
CIL1263S0061														CIL1380S0017					CIL1149S0052
CIL0002S0006														CIL0962S0141					CIL0272S0011
CIL1327S0031														CIL1194S0028					CIL1112S0031
CIL1371S0005														CIL0674S0001					CIL0940S0107
CIL1006S0118														CIL1358S0014					CIL0914S0094
CIL0917S0017														CIL0946S0039					CIL1051S0031
CIL1040S0010														CIL1102S0052					CIL1057S0090
CIL1020S0024														CIL1053S0003					CIL1048S0012
CIL1032S0018														CIL1100S0012					CIL0818S0001
CIL1486S0010														CIL1232S0024					CIL1371S0106
CIL1503S0014														CIL1336S0039					CIL1193S0080
CIL1142S0049														CIL1244S0022					CIL1060S0090
CIL1461S0008														CIL0021S0012					CIL1175S0039
CIL1464S0017														CIL0845S0001					CIL1310S0034
CIL1190S0042														CIL1148S0046					CIL0970S0157
CIL1387S0044														CIL0976S0064					CIL0312S0011
CIL1443S0016														CIL0032S0011					CIL1568S0004
CIL0064S0045														CIL0902S0128					CIL1187S0023
CIL1037S0078														CIL1224S0025					CIL1120S0020
CIL1494S0053														CIL0902S0203					CIL0909S0148
CIL1502S0004														CIL0032S0012					CIL1068S0024
CIL1306S0049														CIL0035S0021					CIL1330S0001
CIL1133S0064														CIL0168S0002					CIL0967S0016
CIL1216S0002														CIL0322S0001					CIL0914S0130
CIL1444S0003														CIL0344S0015					CIL1196S0047
CIL0311S0010														CIL0895S0228					CIL1102S0061
CIL0948S0198														CIL0908S0147					CIL1251S0030
CIL1099S0049														CIL0940S0156					CIL1254S0069
CIL1018S0080														CIL0989S0022					CIL1503S0022
CIL1541S0020														CIL0992S0032					CIL1196S0043
CIL1153S0083														CIL1002S0118					CIL1043S0081
CIL0957S0181														CIL1063S0074					CIL1387S0023
CIL1102S0080														CIL1101S0048					CIL1407S0004
CIL1483S0031														CIL1126S0103					CIL0171S0002
CIL1312S0018														CIL1222S0014					CIL0967S0033
CIL1040S0054														CIL1276S0013					CIL1199S0016
CIL0940S0161														CIL1303S0026					CIL1131S0039
CIL1201S0052														CIL1324S0056					CIL1400S0029
CIL1482S0019														CIL1406S0016					CIL0893S0296
CIL0002S0007														CIL1602S0010					CIL1006S0077
CIL1135S0024														CIL1603S0047					CIL0912S0139
CIL0945S0078																			CIL0940S0175
CIL1533S0018																			CIL1100S0107
CIL1546S0016																			CIL1231S0031
CIL1040S0036																			CIL1267S0020
CIL0948S0038																			CIL1189S0012
CIL1237S0004																			CIL1060S0094
CIL0025S0007																			CIL1163S0015
CIL1020S0064																			CIL0962S0117
CIL1071S0010																			CIL1090S0039
CIL0919S0173																			CIL1034S0047
CIL1286S0008																			CIL1055S0059
CIL1464S0027																			CIL1375S0032
CIL0010S0025																			CIL1082S0003
CIL1229S0009																			CIL1064S0094
CIL0917S0049																			CIL0967S0156
CIL1258S0013																			CIL1153S0068
CIL1534S0013																			CIL1551S0016
CIL1273S0016																			CIL1361S0025
CIL1106S0011																			CIL1006S0039
CIL1031S0047																			CIL1321S0020
CIL1229S0063																			CIL0972S0008
CIL0385S0031																			CIL1324S0053
CIL1325S0039																			CIL1400S0012
CIL1294S0027																			CIL1112S0091
CIL1119S0046																			CIL0091S0003
CIL1604S0012																			CIL0940S0185
CIL1176S0011																			CIL1148S0011
CIL1219S0028																			CIL0657S0001
CIL1136S0005																			CIL0140S0014
CIL0170S0004																			CIL1325S0036
CIL0455S0014																			CIL0945S0153
CIL0942S0197																			CIL0979S0006
CIL1456S0068																			CIL1068S0093
CIL1164S0045																			CIL1199S0004
CIL1216S0082																			CIL1003S0104
CIL0895S0012																			CIL0087S0006
CIL1205S0063																			CIL1030S0075
CIL0976S0115																			CIL0391S0010
CIL1152S0020																			CIL1155S0060
CIL0121S0009																			CIL0970S0118
CIL0970S0075																			CIL1197S0009
CIL1409S0004																			CIL1246S0102
CIL1099S0011																			CIL1315S0009
CIL1144S0007																			CIL0978S0169
CIL1021S0105																			CIL1508S0040
CIL1359S0016																			CIL0262S0009
CIL1009S0110																			CIL1037S0094
CIL1354S0014																			CIL1001S0017
CIL0937S0024																			CIL1343S0031
CIL0914S0003																			CIL1294S0037
CIL1353S0002																			CIL1562S0006
CIL1068S0089																			CIL1009S0100
CIL1061S0060																			CIL1030S0106
CIL1185S0044																			CIL1025S0026
CIL1407S0021																			CIL1492S0003
CIL1003S0101																			CIL1283S0008
CIL1199S0001																			CIL1295S0033
CIL0906S0162																			CIL1273S0060
CIL1153S0132																			CIL1219S0058
CIL1298S0008																			CIL1315S0017
CIL0948S0200																			CIL1172S0029
CIL1424S0019																			CIL1100S0106
CIL1342S0024																			CIL0899S0163
CIL1193S0097																			CIL0914S0154
CIL1118S0047																			CIL1330S0024
CIL1224S0038																			CIL1066S0099
CIL0923S0081																			CIL1294S0078
CIL1348S0061																			CIL1153S0014
CIL0086S0008																			CIL1018S0108
CIL1118S0034																			CIL1446S0069
CIL1009S0052																			CIL1254S0037
CIL1122S0099																			CIL1462S0029
CIL1139S0039																			CIL1092S0099
CIL1182S0032																			CIL0929S0147
CIL0921S0108																			CIL1554S0004
CIL1173S0072																			CIL0513S0005
CIL1353S0006																			CIL0909S0105
CIL1157S0078																			CIL1184S0049
CIL1568S0006																			CIL1460S0008
CIL1336S0022																			CIL1283S0022
CIL1526S0039																			CIL0951S0120
CIL1294S0051																			CIL1189S0063
CIL1003S0108																			CIL1189S0034
CIL1031S0117																			CIL1444S0004
CIL1277S0045																			CIL0970S0037
CIL1293S0082																			CIL1064S0028
CIL1420S0022																			CIL1327S0004
CIL0923S0274																			CIL0128S0033
CIL1265S0048																			CIL0923S0066
CIL0938S0103																			CIL0302S0011
CIL0257S0001																			CIL1018S0042
CIL1230S0083																			CIL0176S0047
CIL1607S0006																			CIL1110S0050
CIL1009S0068																			CIL1265S0077
CIL1500S0012																			CIL1153S0035
CIL1297S0014																			CIL1018S0016
CIL0177S0018																			CIL1093S0043
CIL1425S0029																			CIL0047S0019
CIL1126S0017																			CIL0355S0005
CIL1093S0058																			CIL1131S0044
CIL1015S0040																			CIL1061S0076
CIL1018S0005																			CIL1446S0023
CIL0893S0248																			CIL1018S0043
CIL1128S0060																			CIL1197S0008
CIL0897S0142																			CIL1555S0012
CIL1158S0089																			CIL1240S0047
CIL1246S0129																			CIL0448S0004
CIL0940S0060																			CIL0919S0178
CIL1145S0077																			CIL1095S0068
CIL1012S0054																			CIL0990S0157
CIL1393S0078																			CIL1118S0012
CIL1396S0031																			CIL1130S0052
CIL0912S0037																			CIL1425S0014
CIL1068S0066																			CIL0962S0095
CIL1567S0018																			CIL1009S0099
CIL1230S0028																			CIL0914S0132
CIL0176S0065																			CIL1020S0048
CIL0259S0004																			CIL1507S0003
CIL1143S0036																			CIL0967S0011
CIL0010S0049																			CIL1512S0004
CIL1505S0014																			CIL1151S0017
CIL1204S0005																			CIL1461S0015
CIL1068S0096																			CIL1265S0068
CIL1315S0019																			CIL1531S0006
CIL1268S0078																			CIL0899S0005
CIL0385S0011																			CIL0895S0020
CIL1078S0008																			CIL0427S0005
CIL1468S0010																			CIL1224S0007
CIL0079S0015																			CIL1242S0044
CIL1164S0003																			CIL1456S0049
CIL1189S0027																			CIL1270S0002
CIL0091S0009																			CIL0923S0090
CIL0929S0219																			CIL1204S0061
CIL1319S0031																			CIL0049S0017
CIL0893S0219																			CIL1144S0024
CIL1481S0013																			CIL1071S0055
CIL0948S0051																			CIL1230S0058
CIL1216S0092																			CIL1030S0031
CIL1596S0033																			CIL0310S0017
CIL1034S0044																			CIL1087S0057
CIL1025S0141																			CIL1614S0016
CIL0021S0019																			CIL1023S0074
CIL1503S0030																			CIL1584S0005
CIL1572S0006																			CIL1526S0040
CIL1153S0002																			CIL0996S0059
CIL1025S0053																			CIL1038S0030
CIL1142S0075																			CIL1577S0044
CIL1429S0016																			CIL0170S0021
CIL1020S0062																			CIL0962S0043
CIL1259S0021																			CIL1210S0022
CIL1162S0013																			CIL1031S0044
CIL1324S0006																			CIL0962S0098
CIL0951S0093																			CIL1144S0052
CIL1132S0039																			CIL1047S0029
CIL0972S0092																			CIL0940S0051
CIL0972S0065																			CIL1020S0022
CIL1343S0041																			CIL1456S0043
CIL1598S0026																			CIL0979S0057
CIL1094S0090																			CIL1113S0021
CIL1427S0007																			CIL1303S0040
CIL0974S0085																			CIL1047S0037
CIL1142S0044																			CIL1071S0027
CIL1469S0035																			CIL1282S0021
CIL0906S0164																			CIL1133S0022
CIL1371S0034																			CIL0135S0010
CIL1098S0038																			CIL1240S0005
CIL0940S0003																			CIL1443S0020
CIL0027S0004																			CIL1562S0004
CIL1253S0022																			CIL0893S0378
CIL1369S0037																			CIL1104S0028
CIL1175S0023																			CIL1446S0006
CIL1436S0005																			CIL1298S0017
CIL0923S0039																			CIL0942S0005
CIL1189S0053																			CIL0902S0188
CIL1143S0079																			CIL1147S0067
CIL1130S0051																			CIL0919S0040
CIL1153S0067																			CIL1370S0032
CIL1147S0085																			CIL0914S0116
CIL1246S0145																			CIL1263S0033
CIL0311S0005																			CIL0945S0020
CIL1063S0030																			CIL0902S0015
CIL1359S0039																			CIL0979S0104
CIL1230S0077																			CIL0293S0006
CIL1295S0010																			CIL1502S0054
CIL0929S0129																			CIL1148S0040
CIL0919S0144																			CIL1614S0017
CIL0893S0374																			CIL1248S0014
CIL0942S0054																			CIL1216S0045
CIL0935S0147																			CIL1372S0018
CIL1317S0072																			CIL0940S0178
CIL0935S0116																			CIL0978S0131
CIL0902S0165																			CIL0228S0019
CIL0957S0189																			CIL0962S0121
CIL0978S0033																			CIL1002S0006
CIL1023S0075																			CIL1001S0087
CIL0004S0014																			CIL0321S0005
CIL1552S0031																			CIL1154S0066
CIL1454S0059																			CIL0192S0002
CIL0982S0037																			CIL0504S0004
CIL1192S0047																			CIL1433S0017
CIL1361S0060																			CIL0984S0057
CIL0992S0078																			CIL0906S0106
CIL1371S0062																			CIL1348S0036
CIL0405S0002																			CIL1196S0035
CIL1446S0029																			CIL1596S0006
CIL0990S0108																			CIL1352S0006
CIL1122S0078																			CIL0114S0007
CIL1047S0054																			CIL1176S0018
CIL1034S0081																			CIL1167S0005
CIL1324S0045																			CIL0919S0083
CIL0156S0033																			CIL0121S0004
CIL1271S0021																			CIL1120S0029
CIL1224S0014																			CIL0970S0115
CIL1023S0059																			CIL1505S0061
CIL1316S0025																			CIL1335S0009
CIL0974S0058																			CIL0957S0022
CIL0218S0010																			CIL1141S0051
CIL1175S0051																			CIL0967S0132
CIL1518S0010																			CIL1132S0006
CIL1075S0045																			CIL1268S0023
CIL1456S0067																			CIL0893S0153
CIL1094S0029																			CIL0218S0030
CIL1134S0075																			CIL0914S0054
CIL0318S0002																			CIL0895S0079
CIL0004S0002																			CIL0945S0148
CIL1324S0059																			CIL1324S0061
CIL0188S0005																			CIL0923S0174
CIL1167S0046																			CIL0001S0049
CIL0272S0005																			CIL1153S0045
CIL0917S0082																			CIL1221S0009
CIL0893S0085																			CIL1330S0042
CIL1235S0056																			CIL0979S0090
CIL1048S0089																			CIL0893S0034
CIL1319S0029																			CIL0908S0093
CIL1040S0094																			CIL1055S0025
CIL0919S0114																			CIL1464S0020
CIL0921S0119																			CIL1231S0023
CIL1099S0059																			CIL1032S0144
CIL1498S0004																			CIL0935S0136
CIL1131S0025																			CIL1575S0021
CIL1092S0121																			CIL1051S0068
CIL1409S0016																			CIL0942S0114
CIL0203S0011																			CIL1429S0019
CIL1063S0017																			CIL1106S0032
CIL0967S0147																			CIL0118S0004
CIL0945S0065																			CIL0992S0064
CIL1599S0011																			CIL0976S0082
CIL0211S0006																			CIL1126S0027
CIL1497S0048																			CIL0922S0048
CIL1578S0016																			CIL0359S0021
CIL0893S0331																			CIL1365S0022
CIL0908S0180																			CIL1136S0027
CIL1461S0001																			CIL1493S0018
CIL1154S0071																			CIL1078S0106
CIL0902S0076																			CIL0368S0009
CIL0987S0024																			CIL1264S0034
CIL0967S0194																			CIL1312S0020
CIL0266S0012																			CIL1405S0006
CIL0978S0037																			CIL1153S0033
CIL1189S0024																			CIL0355S0006
CIL0970S0017																			CIL1156S0088
CIL1076S0052																			CIL0935S0125
CIL1190S0084																			CIL0912S0171
CIL1175S0080																			CIL1494S0050
CIL1158S0082																			CIL1040S0068
CIL1063S0088																			CIL0602S0002
CIL0906S0049																			CIL1486S0023
CIL1087S0027																			CIL1184S0030
CIL1447S0013																			CIL1096S0023
CIL1006S0004																			CIL1185S0020
CIL1405S0048																			CIL1084S0001
CIL1143S0028																			CIL1403S0048
CIL0967S0127																			CIL1043S0046
CIL1112S0006																			CIL1135S0066
CIL1063S0018																			CIL1387S0047
CIL0967S0102																			CIL1464S0013
CIL1118S0063																			CIL1564S0033
CIL1519S0005																			CIL0392S0001
CIL0948S0053																			CIL1225S0038
CIL0982S0135																			CIL0307S0009
CIL1268S0062																			CIL1579S0009
CIL1594S0008																			CIL1325S0084
CIL0354S0010																			CIL0951S0098
CIL0013S0022																			CIL0909S0052
CIL0908S0050																			CIL1219S0036
CIL1495S0035																			CIL1132S0055
CIL1227S0011																			CIL1443S0013
CIL1452S0037																			CIL0218S0015
CIL1565S0011																			CIL0937S0007
CIL1092S0048																			CIL1076S0025
CIL1254S0017																			CIL0940S0159
CIL0993S0015																			CIL1075S0064
CIL1060S0088																			CIL1552S0005
CIL1216S0038																			CIL1134S0059
CIL0942S0220																			CIL1457S0001
CIL1020S0090																			CIL1071S0018
CIL0102S0016																			CIL1387S0018
CIL1084S0009																			CIL0909S0118
CIL1032S0133																			CIL1266S0048
CIL1594S0034																			CIL0990S0026
CIL1456S0066																			CIL0948S0048
CIL0909S0021																			CIL1577S0037
CIL1376S0003																			CIL1181S0005
CIL1416S0014																			CIL1006S0076
CIL1374S0034																			CIL1417S0108
CIL1518S0035																			CIL0978S0055
CIL0957S0161																			CIL1084S0089
CIL1293S0041																			CIL1384S0060
CIL0935S0109																			CIL1324S0023
CIL0993S0048																			CIL0922S0166
CIL1452S0027																			CIL1061S0134
CIL1298S0043																			CIL1484S0017
CIL1479S0016																			CIL0909S0031
CIL0286S0011																			CIL1235S0012
CIL1003S0047																			CIL0651S0001
CIL1199S0010																			CIL1282S0017
CIL1229S0045																			CIL1196S0071
CIL0912S0052																			CIL0967S0038
CIL1204S0042																			CIL0929S0107
CIL1429S0012																			CIL1084S0088
CIL1141S0045																			CIL0912S0106
CIL0948S0073																			CIL1497S0041
CIL1545S0007																			CIL1112S0095
CIL1164S0066																			CIL1134S0095
CIL1082S0056																			CIL1341S0013
CIL1145S0042																			CIL0967S0105
CIL1263S0095																			CIL1056S0039
CIL1052S0001																			CIL1135S0043
CIL1341S0005																			CIL1483S0012
CIL1277S0019																			CIL1343S0029
CIL1118S0061																			CIL1167S0050
CIL1192S0054																			CIL1381S0008
CIL1229S0016																			CIL1295S0035
CIL1502S0053																			CIL1001S0055
CIL1263S0089																			CIL1153S0089
CIL1173S0075																			CIL1090S0051
CIL0394S0012																			CIL1259S0035
CIL1037S0037																			CIL0919S0032
CIL1262S0021																			CIL1456S0041
CIL0982S0142																			CIL1032S0063
CIL1006S0034																			CIL1047S0139
CIL1315S0022																			CIL1137S0037
CIL1433S0005																			CIL1453S0009
CIL0897S0166																			CIL1358S0033
CIL1319S0036																			CIL1505S0050
CIL0945S0077																			CIL1082S0012
CIL0286S0013																			CIL1189S0011
CIL1482S0038																			CIL0909S0025
CIL1518S0004																			CIL1050S0076
CIL1338S0020																			CIL1082S0079
CIL1153S0102																			CIL1578S0027
CIL0929S0031																			CIL0281S0006
CIL1551S0024																			CIL0957S0122
CIL0301S0002																			CIL1180S0013
CIL0895S0249																			CIL1320S0003
CIL0923S0268																			CIL0957S0106
CIL0909S0066																			CIL1012S0030
CIL1155S0026																			CIL1060S0001
CIL1133S0018																			CIL1076S0007
CIL0284S0011																			CIL1279S0017
CIL1227S0003																			CIL1399S0012
CIL1092S0106																			CIL1262S0037
CIL1009S0066																			CIL1507S0020
CIL1417S0046																			CIL1181S0051
CIL0987S0140																			CIL0893S0173
CIL1404S0029																			CIL0984S0086
CIL1142S0031																			CIL1611S0017
CIL1020S0068																			CIL0407S0004
CIL0010S0032																			CIL1268S0043
CIL1148S0015																			CIL1411S0014
CIL1134S0043																			CIL1087S0031
CIL1545S0046																			CIL1467S0026
CIL0358S0008																			CIL1443S0022
CIL1404S0006																			CIL1348S0034
CIL1323S0026																			CIL0607S0001
CIL0946S0033																			CIL1417S0075
CIL1178S0066																			CIL0893S0299
CIL0912S0182																			CIL1383S0027
CIL1165S0049																			CIL0908S0044
CIL0045S0024																			CIL1009S0040
CIL1087S0012																			CIL1207S0033
CIL1167S0047																			CIL1387S0014
CIL1611S0002																			CIL1094S0022
CIL1359S0025																			CIL0215S0020
CIL0224S0008																			CIL0902S0126
CIL0897S0120																			CIL1053S0048
CIL1603S0045																			CIL1021S0064
CIL0902S0073																			CIL1248S0021
CIL0541S0001																			CIL1096S0041
CIL1025S0112																			CIL1424S0013
CIL1259S0026																			CIL1246S0081
CIL0125S0003																			CIL1384S0028
CIL0923S0251																			CIL1010S0001
CIL1473S0013																			CIL1431S0015
CIL1229S0061																			CIL1417S0019
CIL1242S0041																			CIL1018S0013
CIL0967S0122																			CIL0990S0142
CIL1127S0012																			CIL1034S0083
CIL1055S0079																			CIL0976S0070
CIL0992S0106																			CIL0987S0132
CIL1495S0017																			CIL1048S0074
CIL0935S0052																			CIL0622S0001
CIL1481S0030																			CIL1429S0013
CIL0922S0164																			CIL1240S0026
CIL1207S0021																			CIL0021S0002
CIL1164S0083																			CIL0263S0004
CIL0945S0061																			CIL0030S0013
CIL1009S0124																			CIL1229S0036
CIL1127S0036																			CIL0987S0097
CIL1055S0131																			CIL0976S0078
CIL1081S0073																			CIL0202S0005
CIL0970S0111																			CIL0937S0111
CIL1099S0081																			CIL1158S0067
CIL0951S0070																			CIL0010S0013
CIL1585S0015																			CIL1189S0010
CIL1071S0076																			CIL1068S0058
CIL0385S0003																			CIL0272S0009
CIL1078S0088																			CIL1060S0058
CIL1251S0037																			CIL1575S0016
CIL1453S0013																			CIL1196S0008
CIL1520S0026																			CIL1040S0079
CIL0993S0062																			CIL1107S0054
CIL1104S0032																			CIL1094S0074
CIL1187S0034																			CIL1048S0042
CIL1258S0017																			CIL1053S0047
CIL1149S0078																			CIL0938S0052
CIL1175S0088																			CIL1495S0042
CIL0922S0134																			CIL1613S0017
CIL0301S0001																			CIL1175S0078
CIL0205S0003																			CIL0923S0183
CIL1025S0120																			CIL1492S0011
CIL1030S0024																			CIL1401S0033
CIL1374S0038																			CIL0978S0025
CIL0908S0163																			CIL1030S0078
CIL0909S0038																			CIL0407S0002
CIL1071S0011																			CIL1235S0016
CIL1503S0005																			CIL1087S0081
CIL0948S0239																			CIL1084S0026
CIL1132S0048																			CIL0953S0107
CIL1134S0054																			CIL0940S0115
CIL1286S0023																			CIL0628S0007
CIL0940S0090																			CIL1082S0024
CIL1500S0023																			CIL1064S0063
CIL0938S0046																			CIL1144S0029
CIL1012S0057																			CIL1173S0027
CIL1338S0017																			CIL0914S0114
CIL1224S0036																			CIL0495S0002
CIL1499S0023																			CIL1030S0109
CIL1230S0007																			CIL1446S0066
CIL1047S0087																			CIL1197S0060
CIL1057S0061																			CIL0938S0123
CIL1312S0007																			CIL1133S0063
CIL0102S0005																			CIL1465S0012
CIL1557S0029																			CIL1603S0012
CIL0942S0187																			CIL1264S0007
CIL0266S0009																			CIL1156S0034
CIL0989S0021																			CIL1375S0035
CIL0942S0140																			CIL1554S0020
CIL1258S0019																			CIL1205S0043
CIL0922S0075																			CIL0207S0012
CIL0937S0083																			CIL1078S0070
CIL1526S0035																			CIL0202S0003
CIL1134S0018																			CIL1568S0010
CIL1092S0040																			CIL1565S0022
CIL1009S0077																			CIL0937S0025
CIL1127S0035																			CIL0344S0009
CIL0962S0024																			CIL1086S0026
CIL1584S0006																			CIL0945S0081
CIL0151S0006																			CIL1393S0047
CIL1053S0010																			CIL1405S0035
CIL1197S0078																			CIL1134S0057
CIL0906S0165																			CIL0970S0025
CIL1078S0076																			CIL0902S0148
CIL1375S0021																			CIL1508S0031
CIL1380S0036																			CIL1158S0078
CIL0914S0065																			CIL1454S0010
CIL0176S0049																			CIL0059S0007
CIL1222S0020																			CIL0945S0123
CIL1259S0027																			CIL1084S0021
CIL1360S0001																			CIL1464S0001
CIL1126S0018																			CIL1196S0084
CIL0902S0084																			CIL1015S0051
CIL1048S0024																			CIL1090S0061
CIL1323S0017																			CIL1194S0050
CIL1149S0034																			CIL1235S0061
CIL0923S0169																			CIL1315S0013
CIL1196S0039																			CIL1386S0032
CIL1266S0003																			CIL0937S0150
CIL1184S0007																			CIL1313S0023
CIL1009S0061																			CIL1578S0017
CIL0893S0061																			CIL1393S0042
CIL1249S0004																			CIL0990S0054
CIL1192S0049																			CIL0923S0143
CIL1361S0013																			CIL0390S0001
CIL0486S0003																			CIL1048S0044
CIL1222S0068																			CIL0897S0104
CIL1588S0013																			CIL1196S0079
CIL1258S0023																			CIL0998S0001
CIL0921S0015																			CIL0993S0064
CIL1246S0018																			CIL0090S0033
CIL1231S0064																			CIL0450S0008
CIL1038S0046																			CIL1446S0067
CIL1119S0024																			CIL1082S0102
CIL1190S0055																			CIL1429S0023
CIL1486S0034																			CIL0945S0029
CIL1119S0076																			CIL1417S0082
CIL0992S0094																			CIL1420S0011
CIL1393S0024																			CIL1433S0014
CIL1588S0024																			CIL1367S0014
CIL0311S0012																			CIL0135S0009
CIL1171S0057																			CIL1456S0035
CIL1417S0024																			CIL0906S0038
CIL1182S0054																			CIL1157S0022
CIL1063S0071																			CIL1003S0116
CIL1461S0012																			CIL0990S0039
CIL1032S0085																			CIL1060S0021
CIL1057S0084																			CIL1101S0094
CIL0100S0004																			CIL1128S0055
CIL1205S0066																			CIL1099S0051
CIL0978S0148																			CIL1246S0108
CIL1012S0062																			CIL1385S0004
CIL1265S0074																			CIL1317S0030
CIL0929S0069																			CIL1239S0050
CIL1244S0013																			CIL0945S0049
CIL1099S0080																			CIL1031S0088
CIL0945S0100																			CIL1235S0046
CIL1155S0057																			CIL0140S0007
CIL0899S0105																			CIL0979S0002
CIL0937S0147																			CIL1607S0026
CIL1143S0069																			CIL1038S0004
CIL1286S0016																			CIL0324S0016
CIL0989S0070																			CIL1568S0033
CIL1163S0036																			CIL0967S0130
CIL0411S0004																			CIL0987S0075
CIL0895S0008																			CIL1098S0034
CIL1136S0087																			CIL1505S0052
CIL0121S0005																			CIL1138S0092
CIL0992S0111																			CIL0895S0136
CIL0040S0016																			CIL1239S0051
CIL0525S0005																			CIL1226S0053
CIL0205S0017																			CIL1325S0071
CIL1172S0041																			CIL0922S0101
CIL1483S0028																			CIL0957S0020
CIL1055S0014																			CIL0100S0008
CIL1145S0132																			CIL1166S0015
CIL0893S0256																			CIL1147S0068
CIL1374S0028																			CIL1363S0025
CIL0720S0001																			CIL0938S0035
CIL0895S0052																			CIL0150S0008
CIL1003S0075																			CIL0987S0101
CIL1575S0014																			CIL1113S0049
CIL1604S0014																			CIL1400S0026
CIL0946S0086																			CIL0893S0363
CIL0972S0102																			CIL0914S0022
CIL0937S0123																			CIL0009S0020
CIL0914S0027																			CIL1237S0005
CIL1131S0076																			CIL1276S0031
CIL0504S0002																			CIL0989S0071
CIL0979S0101																			CIL1050S0067
CIL0099S0005																			CIL1224S0008
CIL1184S0073																			CIL0908S0052
CIL0358S0002																			CIL0203S0021
CIL1572S0014																			CIL0978S0185
CIL0929S0126																			CIL1259S0084
CIL0978S0014																			CIL1169S0034
CIL0948S0059																			CIL0010S0003
CIL0248S0007																			CIL1037S0038
CIL1081S0008																			CIL1383S0003
CIL0131S0002																			CIL1306S0031
CIL0914S0048																			CIL1038S0117
CIL1246S0120																			CIL1061S0073
CIL1166S0052																			CIL1224S0029
CIL1263S0110																			CIL1032S0095
CIL0284S0012																			CIL0970S0133
CIL0325S0010																			CIL1547S0013
CIL1163S0047																			CIL1308S0018
CIL0002S0046																			CIL0970S0116
CIL1615S0020																			CIL0979S0056
CIL1051S0046																			CIL1025S0122
CIL1112S0107																			CIL0937S0067
CIL1503S0009																			CIL1219S0067
CIL1598S0029																			CIL1107S0034
CIL1031S0095																			CIL1112S0070
CIL1152S0014																			CIL1155S0058
CIL1190S0064																			CIL0970S0160
CIL1040S0088																			CIL1012S0018
CIL0967S0142																			CIL1071S0104
CIL1380S0030																			CIL0914S0157
CIL1534S0005																			CIL0922S0192
CIL1515S0022																			CIL0978S0020
CIL1173S0018																			CIL1390S0043
CIL0246S0003																			CIL1520S0046
CIL1348S0032																			CIL0188S0006
CIL1256S0026																			CIL0310S0015
CIL1061S0097																			CIL1048S0075
CIL1128S0029																			CIL0909S0026
CIL1592S0026																			CIL1293S0059
CIL0967S0234																			CIL1182S0022
CIL0897S0065																			CIL0580S0001
CIL1310S0028																			CIL0972S0091
CIL0990S0152																			CIL0942S0221
CIL1064S0110																			CIL1135S0048
CIL1187S0060																			CIL0906S0124
CIL1503S0020																			CIL1222S0067
CIL0908S0003																			CIL0917S0064
CIL1533S0014																			CIL1342S0047
CIL1142S0042																			CIL0908S0127
CIL1012S0128																			CIL1154S0035
CIL0919S0123																			CIL1050S0078
CIL0970S0018																			CIL0902S0096
CIL1424S0024																			CIL0912S0083
CIL1093S0135																			CIL1086S0063
CIL1280S0027																			CIL0272S0010
CIL1060S0066																			CIL0514S0005
CIL0923S0236																			CIL1215S0032
CIL0156S0023																			CIL1361S0020
CIL1112S0068																			CIL1133S0025
CIL1304S0016																			CIL1500S0051
CIL1128S0023																			CIL0940S0198
CIL1090S0035																			CIL1126S0101
CIL1268S0021																			CIL1060S0073
CIL1502S0021																			CIL1354S0046
CIL1483S0030																			CIL0923S0098
CIL1169S0029																			CIL1021S0079
CIL0364S0002																			CIL1492S0036
CIL1298S0010																			CIL0145S0007
CIL1383S0029																			CIL1078S0011
CIL1051S0034																			CIL1500S0029
CIL1192S0072																			CIL1060S0037
CIL1409S0019																			CIL0951S0107
CIL1416S0017																			CIL1263S0091
CIL0424S0004																			CIL1000S0001
CIL1003S0014																			CIL1055S0113
CIL0128S0027																			CIL1304S0038
CIL1555S0045																			CIL1095S0040
CIL1318S0024																			CIL1246S0067
CIL1365S0030																			CIL1032S0035
CIL1482S0032																			CIL1034S0062
CIL0133S0014																			CIL1385S0030
CIL1175S0061																			CIL1021S0108
CIL1001S0110																			CIL1158S0008
CIL1025S0093																			CIL0902S0184
CIL0929S0194																			CIL1015S0093
CIL1371S0090																			CIL0906S0123
CIL1126S0055																			CIL0972S0021
CIL1295S0042																			CIL0893S0234
CIL1497S0066																			CIL0982S0109
CIL1282S0022																			CIL1515S0035
CIL0672S0001																			CIL1122S0041
CIL1012S0007																			CIL0895S0165
CIL1596S0023																			CIL1037S0013
CIL1251S0039																			CIL1196S0089
CIL1020S0116																			CIL1131S0065
CIL0922S0208																			CIL0914S0133
CIL1167S0071																			CIL1164S0030
CIL1193S0053																			CIL1321S0011
CIL1215S0015																			CIL0921S0141
CIL1229S0057																			CIL1477S0021
CIL1259S0003																			CIL0045S0015
CIL0465S0014																			CIL1032S0068
CIL1339S0016																			CIL1165S0022
CIL1546S0045																			CIL1187S0073
CIL1015S0032																			CIL1326S0021
CIL1118S0055																			CIL1226S0039
CIL1066S0038																			CIL0064S0025
CIL1037S0104																			CIL1114S0034
CIL0899S0157																			CIL0145S0008
CIL0782S0011																			CIL1266S0004
CIL0945S0075																			CIL1131S0068
CIL0271S0012																			CIL0923S0129
CIL0998S0045																			CIL1346S0021
CIL1205S0062																			CIL1021S0003
CIL1327S0040																			CIL1229S0020
CIL0974S0004																			CIL1619S0001
CIL1242S0085																			CIL0146S0008
CIL1340S0026																			CIL1226S0054
CIL1293S0081																			CIL1372S0041
CIL0919S0161																			CIL1295S0032
CIL0912S0086																			CIL0974S0072
CIL1038S0032																			CIL1310S0035
CIL1499S0010																			CIL1184S0048
CIL1075S0074																			CIL1092S0041
CIL1303S0043																			CIL1320S0019
CIL1466S0020																			CIL1087S0041
CIL1145S0124																			CIL0207S0002
CIL1029S0047																			CIL1507S0008
CIL1136S0051																			CIL1031S0039
CIL0037S0013																			CIL0923S0208
CIL1048S0007																			CIL1106S0044
CIL1118S0062																			CIL1040S0067
CIL1196S0083																			CIL1317S0040
CIL1029S0033																			CIL0917S0079
CIL0998S0029																			CIL1128S0025
CIL0970S0144																			CIL1152S0070
CIL1317S0021																			CIL1032S0134
CIL1454S0057																			CIL1084S0056
CIL1001S0064																			CIL0938S0084
CIL1093S0047																			CIL1003S0054
CIL1443S0033																			CIL1555S0023
CIL1615S0019																			CIL1086S0047
CIL0970S0074																			CIL1082S0133
CIL1330S0026																			CIL1325S0054
CIL0293S0013																			CIL0895S0218
CIL0979S0163																			CIL1032S0062
CIL1512S0011																			CIL1104S0036
CIL0654S0001																			CIL0225S0017
CIL0992S0082																			CIL1032S0067
CIL0064S0037																			CIL1134S0026
CIL0962S0052																			CIL0271S0007
CIL1055S0043																			CIL0957S0173
CIL1106S0048																			CIL1466S0021
CIL0233S0005																			CIL0923S0141
CIL1483S0010																			CIL0895S0107
CIL0923S0189																			CIL1066S0068
CIL0284S0016																			CIL0984S0061
CIL1405S0022																			CIL0902S0136
CIL1598S0009																			CIL0967S0124
CIL1032S0080																			CIL0987S0041
CIL1171S0028																			CIL1336S0051
CIL1207S0040																			CIL1271S0026
CIL1405S0081																			CIL1219S0081
CIL1570S0019																			CIL1193S0087
CIL0121S0023																			CIL0023S0012
CIL1021S0001																			CIL1142S0060
CIL1133S0073																			CIL1592S0017
CIL1196S0023																			CIL0919S0014
CIL1006S0017																			CIL0094S0037
CIL1120S0016																			CIL1002S0002
CIL0031S0009																			CIL1029S0075
CIL1207S0074																			CIL1031S0094
CIL1133S0017																			CIL0942S0212
CIL1390S0024																			CIL0925S0024
CIL1032S0128																			CIL1051S0006
CIL1155S0065																			CIL1405S0020
CIL1400S0015																			CIL1447S0025
CIL1550S0007																			CIL0909S0214
CIL1143S0076																			CIL1436S0020
CIL0922S0163																			CIL1462S0003
CIL1038S0098																			CIL1481S0018
CIL1078S0029																			CIL1081S0028
CIL1352S0024																			CIL1326S0040
CIL1271S0011																			CIL1294S0038
CIL1506S0004																			CIL1219S0088
CIL0347S0003																			CIL0049S0015
CIL1178S0050																			CIL1520S0016
CIL1063S0014																			CIL1370S0016
CIL1093S0065																			CIL1582S0017
CIL0897S0159																			CIL1546S0005
CIL1100S0088																			CIL0942S0017
CIL0098S0002																			CIL0935S0007
CIL1134S0036																			CIL1182S0046
CIL1224S0022																			CIL1031S0115
CIL1122S0058																			CIL0942S0109
CIL1495S0023																			CIL0112S0019
CIL1531S0013																			CIL0984S0089
CIL1107S0057																			CIL1040S0085
CIL1153S0059																			CIL1325S0075
CIL1565S0018																			CIL1411S0007
CIL1254S0011																			CIL0989S0020
CIL0112S0002																			CIL1023S0011
CIL1064S0024																			CIL1534S0030
CIL1417S0102																			CIL0246S0018
CIL1030S0129																			CIL1376S0005
CIL1157S0050																			CIL1167S0003
CIL1218S0021																			CIL0948S0100
CIL1145S0139																			CIL1584S0027
CIL1263S0050																			CIL1155S0024
CIL0972S0111																			CIL1429S0033
CIL0396S0001																			CIL1047S0030
CIL1131S0070																			CIL0921S0051
CIL1101S0045																			CIL0976S0053
CIL1598S0017																			CIL0925S0127
CIL1393S0075																			CIL1068S0013
CIL1149S0093																			CIL1464S0015
CIL0990S0012																			CIL0310S0021
CIL0030S0012																			CIL1165S0007
CIL1147S0081																			CIL1618S0001
CIL1577S0007																			CIL0914S0153
CIL1456S0050																			CIL1093S0003
CIL1559S0014																			CIL0202S0004
CIL1240S0019																			CIL0899S0172
CIL1403S0011																			CIL1167S0056
CIL0948S0055																			CIL1076S0057
CIL1083S0012																			CIL1130S0072
CIL1197S0012																			CIL1312S0032
CIL1092S0016																			CIL0246S0022
CIL1198S0044																			CIL0976S0102
CIL1525S0039																			CIL1294S0044
CIL0630S0001																			CIL0902S0002
CIL0912S0054																			CIL0957S0186
CIL1462S0019																			CIL1422S0004
CIL1182S0068																			CIL1142S0072
CIL0937S0166																			CIL0893S0108
CIL0987S0135																			CIL0923S0244
CIL0993S0003																			CIL1205S0041
CIL1425S0012																			CIL1317S0048
CIL0923S0053																			CIL1099S0013
CIL0929S0197																			CIL1293S0077
CIL0984S0017																			CIL1131S0040
CIL1486S0009																			CIL1459S0018
CIL0922S0091																			CIL0935S0004
CIL1093S0010																			CIL0996S0024
CIL1417S0039																			CIL0922S0069
CIL0053S0007																			CIL1244S0006
CIL1155S0054																			CIL1009S0115
CIL0976S0023																			CIL1092S0006
CIL1136S0025																			CIL1564S0051
CIL0979S0017																			CIL0415S0001
CIL1155S0025																			CIL1064S0022
CIL1431S0032																			CIL0262S0008
CIL0978S0164																			CIL1127S0005
CIL0987S0148																			CIL1154S0020
CIL1353S0007																			CIL1094S0025
CIL1525S0031																			CIL0962S0108
CIL0938S0061																			CIL0908S0041
CIL1518S0032																			CIL1335S0008
CIL1577S0026																			CIL1294S0046
CIL1099S0005																			CIL1037S0039
CIL0215S0001																			CIL0929S0084
CIL1119S0068																			CIL1332S0039
CIL1187S0027																			CIL1135S0022
CIL1320S0020																			CIL0049S0018
CIL0925S0061																			CIL0235S0014
CIL1128S0041																			CIL0923S0105
CIL1343S0055																			CIL1508S0025
CIL1372S0030																			CIL0979S0134
CIL1253S0012																			CIL1100S0113
CIL1486S0044																			CIL1283S0034
CIL0128S0001																			CIL1386S0046
CIL1230S0059																			CIL1038S0068
CIL1324S0024																			CIL1203S0018
CIL1393S0077																			CIL0923S0178
CIL0912S0091																			CIL1131S0007
CIL0906S0152																			CIL1505S0009
CIL0908S0010																			CIL1131S0013
CIL1068S0103																			CIL1393S0071
CIL1189S0021																			CIL1387S0016
CIL1265S0047																			CIL1265S0062
CIL0948S0128																			CIL0895S0077
CIL1539S0037																			CIL1399S0011
CIL0086S0005																			CIL1154S0079
CIL1425S0002																			CIL1236S0044
CIL1603S0006																			CIL1094S0023
CIL0948S0203																			CIL1134S0008
CIL0276S0006																			CIL1025S0037
CIL0001S0010																			CIL1156S0036
CIL0945S0124																			CIL1400S0011
CIL0935S0121																			CIL1230S0037
CIL0979S0105																			CIL1061S0079
CIL1148S0028																			CIL1451S0001
CIL0259S0010																			CIL1273S0050
CIL1173S0008																			CIL0987S0144
CIL1226S0049																			CIL1565S0024
CIL0923S0045																			CIL1416S0037
CIL1090S0008																			CIL0170S0013
CIL0086S0006																			CIL1112S0007
CIL1002S0028																			CIL1391S0024
CIL1050S0050																			CIL0628S0008
CIL1434S0006																			CIL1156S0015
CIL0121S0006																			CIL0990S0075
CIL1061S0087																			CIL1230S0090
CIL1461S0020																			CIL0893S0365
CIL1038S0074																			CIL1102S0013
CIL1404S0007																			CIL1075S0007
CIL1405S0055																			CIL1082S0043
CIL1055S0110																			CIL1164S0087
CIL1416S0051																			CIL1371S0064
CIL1094S0056																			CIL0177S0012
CIL0203S0008																			CIL1009S0009
CIL1130S0017																			CIL0919S0103
CIL1366S0016																			CIL1043S0069
CIL1196S0091																			CIL1570S0010
CIL1438S0007																			CIL1021S0109
CIL0089S0005																			CIL0945S0094
CIL1577S0034																			CIL1240S0024
CIL0662S0001																			CIL1028S0067
CIL1317S0051																			CIL0893S0056
CIL1446S0062																			CIL1526S0033
CIL0538S0002																			CIL0010S0036
CIL1298S0038																			CIL1196S0016
CIL0917S0050																			CIL1342S0029
CIL1031S0090																			CIL0301S0009
CIL1399S0003																			CIL1102S0087
CIL1107S0088																			CIL0948S0244
CIL0978S0064																			CIL0957S0011
CIL0902S0090																			CIL1197S0065
CIL0410S0003																			CIL0908S0043
CIL1040S0004																			CIL1317S0031
CIL1060S0063																			CIL1145S0114
CIL1003S0122																			CIL1132S0077
CIL1040S0003																			CIL0940S0195
CIL0938S0127																			CIL1306S0034
CIL1339S0017																			CIL1226S0042
CIL1001S0099																			CIL1446S0001
CIL0919S0194																			CIL0906S0045
CIL1317S0078																			CIL0982S0050
CIL0235S0020																			CIL1012S0145
CIL1057S0102																			CIL1151S0008
CIL1375S0015																			CIL1066S0041
CIL1068S0067																			CIL0149S0003
CIL0914S0128																			CIL0454S0006
CIL1495S0010																			CIL0385S0007
CIL0923S0080																			CIL0987S0018
CIL1197S0063																			CIL1323S0008
CIL0009S0035																			CIL1543S0006
CIL1164S0057																			CIL1012S0011
CIL1096S0060																			CIL1374S0029
CIL1100S0100																			CIL1030S0029
CIL0094S0031																			CIL1068S0099
CIL1427S0015																			CIL1173S0045
CIL1090S0019																			CIL0073S0030
CIL0205S0012																			CIL1182S0019
CIL1553S0025																			CIL1490S0015
CIL1336S0031																			CIL1025S0051
CIL1439S0023																			CIL0897S0135
CIL1126S0042																			CIL0320S0007
CIL1145S0153																			CIL0962S0069
CIL0967S0005																			CIL0909S0039
CIL1582S0038																			CIL1110S0016
CIL1120S0007																			CIL1066S0012
CIL1122S0017																			CIL1454S0061
CIL1099S0082																			CIL1603S0027
CIL1330S0045																			CIL1265S0112
CIL1539S0030																			CIL0260S0016
CIL0987S0129																			CIL1577S0029
CIL0899S0179																			CIL0061S0010
CIL1262S0026																			CIL0967S0117
CIL0923S0059																			CIL0893S0302
CIL1093S0023																			CIL1318S0010
CIL1030S0034																			CIL1205S0047
CIL1138S0064																			CIL1319S0022
CIL1245S0037																			CIL1126S0100
CIL1259S0060																			CIL1386S0013
CIL1431S0036																			CIL0897S0061
CIL0272S0003																			CIL1030S0098
CIL0381S0004																			CIL0938S0023
CIL1048S0070																			CIL0037S0032
CIL1143S0035																			CIL1596S0019
CIL1434S0002																			CIL1464S0012
CIL1295S0059																			CIL1246S0090
CIL1417S0085																			CIL1317S0007
CIL0929S0005																			CIL0309S0007
CIL1393S0026																			CIL0929S0108
CIL1371S0042																			CIL1565S0005
CIL1383S0020																			CIL1061S0037
CIL1569S0010																			CIL1020S0014
CIL1358S0034																			CIL0385S0006
CIL1551S0012																			CIL1312S0053
CIL0240S0002																			CIL1519S0027
CIL1003S0045																			CIL1401S0025
CIL0002S0002																			CIL1182S0070
CIL0937S0125																			CIL1090S0077
CIL1266S0001																			CIL0917S0081
CIL0929S0090																			CIL1132S0016
CIL1518S0031																			CIL1374S0018
CIL0982S0106																			CIL0258S0013
CIL1037S0098																			CIL1385S0033
CIL1317S0050																			CIL1361S0014
CIL0984S0022																			CIL0902S0139
CIL0921S0121																			CIL1090S0048
CIL1107S0018																			CIL1143S0065
CIL1271S0022																			CIL1018S0107
CIL1092S0108																			CIL1092S0080
CIL1153S0120																			CIL1096S0067
CIL1328S0047																			CIL0114S0026
CIL1047S0117																			CIL1120S0047
CIL1425S0038																			CIL0922S0191
CIL1009S0010																			CIL1550S0020
CIL1193S0069																			CIL0917S0123
CIL1216S0065																			CIL0922S0001
CIL0396S0003																			CIL0325S0006
CIL1404S0016																			CIL1096S0064
CIL1030S0101																			CIL1547S0014
CIL1320S0023																			CIL0151S0001
CIL1003S0061																			CIL1066S0066
CIL0893S0315																			CIL1145S0056
CIL0974S0026																			CIL0897S0112
CIL1092S0018																			CIL1003S0143
CIL1081S0045																			CIL0252S0010
CIL1235S0022																			CIL0946S0073
CIL1446S0050																			CIL0131S0014
CIL1277S0040																			CIL1003S0043
CIL1099S0017																			CIL1282S0001
CIL1463S0010																			CIL1293S0053
CIL0953S0012																			CIL1248S0025
CIL1127S0048																			CIL0893S0335
CIL1219S0079																			CIL1273S0065
CIL1283S0031																			CIL0993S0053
CIL1156S0023																			CIL1406S0019
CIL0919S0168																			CIL0893S0290
CIL0940S0186																			CIL0893S0354
CIL0987S0025																			CIL1449S0025
CIL1505S0011																			CIL1477S0028
CIL1543S0018																			CIL1134S0015
CIL1094S0017																			CIL1456S0034
CIL1155S0015																			CIL1060S0114
CIL1308S0035																			CIL1015S0041
CIL1184S0064																			CIL1344S0003
CIL1369S0007																			CIL1325S0079
CIL1543S0022																			CIL0218S0003
CIL0987S0013																			CIL1047S0081
CIL1476S0029																			CIL0929S0223
CIL1002S0075																			CIL0908S0065
CIL1078S0113																			CIL0948S0176
CIL1148S0013																			CIL1295S0027
CIL0948S0043																			CIL0156S0021
CIL1196S0095																			CIL0160S0018
CIL1531S0050																			CIL1502S0044
CIL0972S0134																			CIL1093S0098
CIL1064S0066																			CIL1454S0062
CIL1100S0080																			CIL0094S0018
CIL1320S0029																			CIL1325S0062
CIL0942S0032																			CIL1325S0022
CIL1060S0064																			CIL1082S0130
CIL1060S0028																			CIL1263S0047
CIL1212S0041																			CIL1086S0049
CIL1526S0015																			CIL0996S0072
CIL0935S0094																			CIL1009S0104
CIL1050S0011																			CIL0100S0026
CIL1587S0008																			CIL1525S0028
CIL0922S0105																			CIL1263S0026
CIL1047S0125																			CIL1143S0058
CIL1152S0057																			CIL1152S0038
CIL1413S0001																			CIL1564S0016
CIL0982S0010																			CIL1216S0073
CIL0909S0181																			CIL1075S0042
CIL1145S0134																			CIL1090S0023
CIL0940S0038																			CIL1501S0039
CIL0919S0061																			CIL1324S0039
CIL1371S0108																			CIL1369S0026
CIL0260S0010																			CIL0993S0049
CIL1344S0016																			CIL1579S0016
CIL1578S0007																			CIL0899S0117
CIL1184S0054																			CIL1023S0058
CIL1100S0061																			CIL1245S0005
CIL1190S0032																			CIL1012S0017
CIL0987S0151																			CIL0062S0001
CIL1151S0029																			CIL0923S0197
CIL1273S0053																			CIL1009S0087
CIL1051S0024																			CIL1076S0104
CIL1031S0098																			CIL1144S0008
CIL1570S0001																			CIL0212S0008
CIL1053S0037																			CIL0937S0069
CIL0942S0049																			CIL1245S0024
CIL1303S0012																			CIL0929S0071
CIL1190S0005																			CIL1471S0007
CIL1493S0031																			CIL0998S0046
CIL1176S0016																			CIL1193S0047
CIL1300S0072																			CIL1023S0051
CIL1256S0032																			CIL1295S0047
CIL1531S0036																			CIL0948S0230
CIL0909S0207																			CIL1012S0035
CIL1286S0030																			CIL0948S0233
CIL1393S0038																			CIL1495S0043
CIL1352S0022																			CIL0970S0134
CIL0037S0010																			CIL1543S0011
CIL1094S0051																			CIL0902S0150
CIL1239S0030																			CIL0176S0007
CIL0359S0030																			CIL1372S0027
CIL1155S0004																			CIL1061S0085
CIL1497S0055																			CIL0893S0416
CIL0922S0173																			CIL1086S0006
CIL1145S0140																			CIL1030S0144
CIL1172S0047																			CIL1363S0023
CIL1443S0034																			CIL1230S0025
CIL0068S0009																			CIL0145S0010
CIL0957S0105																			CIL0897S0038
CIL0923S0086																			CIL1155S0038
CIL1245S0027																			CIL0922S0047
CIL1064S0117																			CIL1332S0069
CIL1055S0130																			CIL1145S0109
CIL1256S0063																			CIL0320S0003
CIL0893S0419																			CIL1012S0079
CIL1212S0051																			CIL1156S0013
CIL1240S0033																			CIL1122S0039
CIL0893S0386																			CIL1594S0016
CIL1251S0009																			CIL1371S0107
CIL0953S0106																			CIL1308S0023
CIL1242S0083																			CIL1204S0050
CIL0011S0015																			CIL1446S0046
CIL0473S0008																			CIL0233S0006
CIL0071S0006																			CIL1370S0031
CIL1456S0029																			CIL0929S0114
CIL1332S0018																			CIL1383S0037
CIL0914S0067																			CIL1075S0039
CIL0205S0011																			CIL0972S0061
CIL0929S0083																			CIL1061S0091
CIL1172S0036																			CIL0953S0080
CIL1325S0082																			CIL1095S0031
CIL0893S0026																			CIL1219S0060
CIL1178S0018																			CIL1523S0003
CIL1197S0056																			CIL1603S0025
CIL1055S0044																			CIL1324S0001
CIL1131S0087																			CIL1132S0050
CIL1525S0051																			CIL0644S0006
CIL1352S0019																			CIL0967S0175
CIL0921S0011																			CIL1114S0012
CIL1134S0019																			CIL1171S0041
CIL1325S0009																			CIL1113S0015
CIL0895S0015																			CIL0962S0001
CIL0897S0042																			CIL0982S0042
CIL1094S0032																			CIL0967S0151
CIL0893S0396																			CIL0919S0047
CIL1308S0036																			CIL1402S0027
CIL0948S0109																			CIL0909S0165
CIL1114S0037																			CIL1020S0071
CIL1120S0019																			CIL1446S0072
CIL1341S0033																			CIL1184S0006
CIL1420S0015																			CIL1148S0045
CIL1461S0036																			CIL1131S0096
CIL1497S0005																			CIL0155S0017
CIL1456S0072																			CIL1277S0034
CIL0923S0207																			CIL1031S0029
CIL0909S0162																			CIL1263S0042
CIL0202S0019																			CIL1122S0100
CIL0979S0019																			CIL0989S0036
CIL0979S0127																			CIL0909S0049
CIL1546S0032																			CIL1265S0096
CIL0309S0008																			CIL0922S0003
CIL0929S0023																			CIL1370S0023
CIL0970S0070																			CIL1086S0078
CIL1102S0053																			CIL1604S0030
CIL1254S0036																			CIL1340S0039
CIL1365S0013																			CIL1263S0035
CIL1443S0012																			CIL0909S0149
CIL1286S0015																			CIL1057S0010
CIL0929S0034																			CIL0917S0160
CIL0945S0067																			CIL0319S0005
CIL1343S0016																			CIL1003S0135
CIL1431S0040																			CIL1102S0085
CIL0021S0006																			CIL0070S0014
CIL0982S0059																			CIL1431S0033
CIL0940S0160																			CIL0919S0159
CIL1298S0029																			CIL0962S0097
CIL0272S0007																			CIL1546S0006
CIL1048S0027																			CIL1003S0022
CIL1055S0072																			CIL1305S0035
CIL1303S0044																			CIL1541S0002
CIL0976S0130																			CIL1087S0067
CIL0987S0034																			CIL1090S0022
CIL1032S0032																			CIL1055S0115
CIL1126S0104																			CIL1131S0034
CIL1184S0077																			CIL1132S0061
CIL1273S0040																			CIL0897S0010
CIL1503S0003																			CIL0831S0001
CIL1048S0068																			CIL0970S0068
CIL1384S0053																			CIL1578S0008
CIL1076S0086																			CIL1092S0034
CIL0401S0002																			CIL0064S0039
CIL1609S0012																			CIL1458S0035
CIL0260S0013																			CIL1471S0004
CIL0976S0045																			CIL0028S0018
CIL0923S0011																			CIL1236S0033
CIL0461S0003																			CIL1465S0028
CIL0906S0047																			CIL1153S0082
CIL1051S0025																			CIL0962S0115
CIL1613S0011																			CIL1061S0074
CIL1342S0018																			CIL1326S0035
CIL1132S0041																			CIL0324S0017
CIL1064S0021																			CIL0381S0008
CIL1393S0023																			CIL1303S0048
CIL0450S0016																			CIL1463S0017
CIL0940S0013																			CIL1280S0007
CIL1393S0021																			CIL1376S0001
CIL0140S0015																			CIL0948S0077
CIL1031S0031																			CIL0422S0006
CIL1122S0081																			CIL0990S0127
CIL1293S0080																			CIL0925S0025
CIL0480S0010																			CIL0987S0048
CIL1407S0035																			CIL0992S0015
CIL0293S0024																			CIL1207S0010
CIL1055S0047																			CIL1372S0010
CIL1146S0021																			CIL1204S0079
CIL0893S0199																			CIL1133S0044
CIL1442S0001																			CIL1219S0012
CIL1497S0009																			CIL1009S0101
CIL0354S0005																			CIL1293S0007
CIL1205S0006																			CIL0996S0050
CIL1325S0066																			CIL1251S0034
CIL0951S0010																			CIL1245S0034
CIL1099S0056																			CIL0937S0012
CIL1259S0029																			CIL1089S0046
CIL1578S0003																			CIL1138S0012
CIL0919S0093																			CIL0909S0077
CIL1148S0010																			CIL0967S0065
CIL1358S0045																			CIL1402S0024
CIL1075S0031																			CIL1246S0119
CIL1018S0007																			CIL1081S0074
CIL1094S0045																			CIL0978S0141
CIL1048S0063																			CIL1064S0047
CIL1566S0001																			CIL0987S0030
CIL1134S0007																			CIL1039S0001
CIL0002S0031																			CIL1145S0057
CIL1003S0102																			CIL1359S0036
CIL0978S0038																			CIL1602S0021
CIL1009S0109																			CIL1246S0072
CIL0919S0156																			CIL1110S0049
CIL0906S0024																			CIL1028S0064
CIL1003S0128																			CIL0389S0003
CIL1171S0067																			CIL1171S0015
CIL1194S0013																			CIL1359S0044
CIL1158S0013																			CIL0422S0002
CIL0338S0008																			CIL0914S0002
CIL1221S0015																			CIL1505S0036
CIL1305S0065																			CIL1138S0088
CIL0275S0006																			CIL1507S0007
CIL0923S0166																			CIL0368S0006
CIL1300S0028																			CIL0554S0007
CIL1032S0014																			CIL0940S0180
CIL0047S0014																			CIL0987S0095
CIL1433S0010																			CIL1465S0017
CIL0917S0039																			CIL0310S0022
CIL1229S0065																			CIL0189S0012
CIL1110S0081																			CIL1236S0010
CIL0176S0005																			CIL1175S0050
CIL0978S0065																			CIL0919S0189
CIL1038S0034																			CIL1028S0002
CIL1248S0019																			CIL1025S0142
CIL0047S0011																			CIL1078S0002
CIL1151S0001																			CIL1096S0018
CIL1037S0105																			CIL1015S0097
CIL1404S0021																			CIL1158S0086
CIL0895S0201																			CIL1066S0062
CIL0899S0089																			CIL1254S0039
CIL1205S0003																			CIL1543S0016
CIL1002S0029																			CIL1133S0043
CIL0937S0022																			CIL1235S0031
CIL1003S0130																			CIL1375S0001
CIL1164S0082																			CIL1196S0048
CIL1009S0034																			CIL1100S0089
CIL1508S0030																			CIL0381S0009
CIL1147S0086																			CIL1494S0037
CIL1293S0057																			CIL1205S0064
CIL1098S0039																			CIL1306S0044
CIL0976S0021																			CIL0940S0145
CIL1456S0033																			CIL1323S0044
CIL1246S0002																			CIL1335S0042
CIL0922S0056																			CIL0211S0004
CIL1012S0022																			CIL1246S0076
CIL1047S0093																			CIL0923S0228
CIL1444S0037																			CIL1520S0019
CIL0061S0009																			CIL0945S0164
CIL0092S0014																			CIL1604S0028
CIL1417S0104																			CIL0929S0199
CIL0948S0235																			CIL1456S0038
CIL0979S0119																			CIL1060S0017
CIL0338S0014																			CIL0992S0022
CIL0922S0068																			CIL0164S0001
CIL0948S0097																			CIL1030S0041
CIL1089S0014																			CIL0922S0172
CIL1148S0006																			CIL0037S0006
CIL1226S0017																			CIL0106S0007
[truncated: 4,150 more rows]

## Sheet: Table S5
Table S5. Differentially expressed PK genes of pecan seedlings in response to drought.
Gene ID	Gene family	0 d	3 d	6 d	9 d	12 d	15 d
CIL1507S0010	AGC_NDR	16.043	12.92	13.15	12.39	11.803	4.19
CIL1507S0009	AGC_NDR	11.303	7.9	7.533	7.07	7.25	2.737
CIL1506S0032	AGC_NDR	8.71	11.053	8.2	5.363	3.37	1.717
CIL0942S0164	AGC_PKA-PKG	37.333	38.78	51.713	56.49	54.667	119.003
CIL1057S0090	AGC_RSK-2	25.817	31.227	42.9	58.893	63.41	83.413
CIL0953S0107	AGC_RSK-2	9.583	9.8	10.703	14.733	22.307	49.31
CIL1216S0026	AGC_RSK-2	149.897	124.807	115.153	96.793	79.527	22.57
CIL1184S0007	AGC_RSK-2	18.067	16.183	19.933	16.493	12.343	7.683
CIL1446S0050	AGC_RSK-2	133.777	94.32	99.633	57.06	45.197	5.21
CIL1305S0065	AGC_RSK-2	41.093	48.163	29.637	15.46	8.117	4.38
CIL0967S0209	AGC_RSK-2	10.73	14.907	10.75	9.383	8.17	1.637
CIL0152S0004	AGC_RSK-2	4.62	5.303	4.627	3.203	3.273	1.1
CIL0366S0012	AGC_RSK-2	5.89	6.733	3.697	2.87	1.343	0.81
CIL0996S0022	AGC_RSK-2	18.613	11.64	1.643	1.503	1.6	0.05
CIL1324S0040	AGC-Pl	22.33	28.88	33.287	42.75	48.433	95.227
CIL1187S0083	CAMK_CAMK1-DCAMKL	0.153	0.31	3.45	9.89	0.863	2.647
CIL1429S0044	CAMK_CAMKL-CHK1	48.987	55.167	91.987	82.74	73.733	103.613
CIL1526S0040	CAMK_CAMKL-CHK1	2.127	2.593	4.84	8.88	21.72	67.507
CIL0967S0132	CAMK_CAMKL-CHK1	9.053	9.477	17.347	58.78	76.87	62
CIL1090S0050	CAMK_CAMKL-CHK1	16.017	19.697	18.747	15.743	24.943	53.12
CIL1158S0067	CAMK_CAMKL-CHK1	12.34	22.32	12.443	17.787	24.697	50.7
CIL0893S0290	CAMK_CAMKL-CHK1	10.013	9.483	12.05	13.227	18.607	27.45
CIL1471S0007	CAMK_CAMKL-CHK1	10.053	12.043	18.507	19.843	21.99	25.747
CIL1193S0097	CAMK_CAMKL-CHK1	39.253	33.653	27.113	28.36	25.093	11.567
CIL1326S0013	CAMK_CAMKL-CHK1	0.197	0.35	1.567	2.277	4.677	11.443
CIL0233S0007	CAMK_CAMKL-CHK1	69.437	89.337	43.22	22.813	13.08	3.983
CIL1339S0013	CAMK_CAMKL-CHK1	10.82	11.107	12.073	4.693	3.753	2.693
CIL1194S0034	CAMK_CAMKL-CHK1	6.77	4.173	2.193	1.547	1.093	0.45
CIL1047S0142	CAMK_CDPK	6.74	8.69	19.003	78.293	101.447	120.033
CIL1216S0001	CAMK_CDPK	23.17	28.88	62.99	73.193	84.537	103.85
CIL0957S0106	CAMK_CDPK	18.153	18.557	46.983	38.29	35.717	53.56
CIL1181S0051	CAMK_CDPK	24.413	27.473	32.777	33.903	36.453	52.78
CIL1417S0075	CAMK_CDPK	25.183	25.43	46.23	52.143	45.837	52.183
CIL1554S0020	CAMK_CDPK	2.95	2.813	10.213	13.803	20.85	48.27
CIL0538S0004	CAMK_CDPK	26.42	23.247	58.397	37.55	37.827	46.957
CIL1477S0021	CAMK_CDPK	1.467	1.53	4.723	11.503	17.75	38.483
CIL1405S0020	CAMK_CDPK	14.867	14.427	29.713	34.71	40.98	36.26
CIL1579S0004	CAMK_CDPK	20.803	29.51	37.303	45.65	50.643	32.743
CIL0628S0008	CAMK_CDPK	9.813	7.143	9.313	15.637	12.677	31.807
CIL0974S0083	CAMK_CDPK	0.44	1.22	1.213	7.987	8.183	12.32
CIL1031S0047	CAMK_CDPK	41.26	37.48	34.567	31.663	31.01	12.023
CIL1611S0002	CAMK_CDPK	28.54	24.057	17.203	12.053	9.323	8.38
CIL1006S0075	CAMK_CDPK	0.403	0.853	5.487	16	17.283	7.033
CIL1404S0007	CAMK_CDPK	27.747	20.103	25.45	23.21	14.487	5.747
CIL1603S0022	CAMK_CDPK	9.56	10.25	11.377	10.963	9.26	4.597
CIL1467S0029	CAMK_CDPK	6.113	4.33	15.02	8.19	8.82	2.853
CIL0979S0047	CAMK_CDPK	11.413	15.88	11.787	7.367	4.493	2.677
CIL1226S0040	CAMK_CDPK	10.817	3.493	3.69	1.993	1.38	1.057
CIL0922S0017	CAMK_CDPK	6.487	8.88	6.497	3.93	1.62	0.737
CIL1607S0017	CAMK_OST1L	41.693	43.757	147.437	117.487	101.883	144.457
CIL0909S0118	CAMK_OST1L	28.94	40.723	41.923	59.183	63.177	56.59
CIL0143S0028	CAMK_OST1L	2.62	3.75	8.94	10.193	10.827	18.423
CIL1012S0075	CAMK_OST1L	2.08	3.217	14.54	18.237	18.8	17.813
CIL0976S0023	CAMK_OST1L	15.807	18.107	16.14	12.347	11.077	6.013
CIL1164S0057	CAMK_OST1L	16.613	21.237	22.323	16.19	10.133	5.523
CIL1082S0113	CAMK_OST1L	5.637	5.5	15.7	12.697	12.767	5.313
CIL0409S0006	CAMK_OST1L	7.91	6.86	9.527	12.153	4.05	1.517
CIL1131S0040	CK1_CK1	12.663	12.81	19.563	20.657	24.213	33.907
CIL1293S0007	CK1_CK1	8.743	11.557	11.97	11.34	12.607	22.673
CIL1040S0079	CMGC_CDK-CCRK	20.46	22.403	25.193	28.307	30.433	50.327
CIL1104S0028	CMGC_CDK-CRK7-CDK9	9.557	10.17	24.46	30.147	40.413	65.39
CIL1018S0107	CMGC_CDK-CRK7-CDK9	13.053	15.37	15.393	17.42	22.903	28.237
CIL1520S0019	CMGC_CDK-CRK7-CDK9	9.897	11.32	13.313	24.863	23.323	21.323
CIL0293S0011	CMGC_CDK-CRK7-CDK9	5.497	5.197	4.593	3.423	3.423	11.553
CIL1240S0069	CMGC_CDK-CRK7-CDK9	2.597	3.487	3.13	3.607	3.917	6.47
CIL0982S0106	CMGC_CDK-CRK7-CDK9	14.473	15.443	13.85	11.023	8.96	5.293
CIL0401S0002	CMGC_CDK-CRK7-CDK9	14.867	20.033	21.247	14.47	9.853	4.56
CIL1263S0094	CMGC_CDK-CRK7-CDK9	16.53	21.007	17.593	11.287	8.48	1.957
CIL1025S0116	CMGC_CDK-CRK7-CDK9	11.51	10.333	8.967	7.393	5.533	1.767
CIL1294S0017	CMGC_CDK-Pl	1.337	13.247	0.713	1.017	1.407	2.77
CIL0948S0014	CMGC_CDK-Pl	10.85	20.75	21.9	10.247	8.87	0.767
CIL0099S0005	CMGC_CK2	17.293	18.58	15.637	14.567	11.667	7.293
CIL1021S0040	CMGC_DYRK-PRP4	8.063	9.83	14.6	18.33	15.863	18.917
CIL1594S0019	CMGC_GSK	102.237	110.22	164.05	190.313	217.143	265.59
CIL1066S0079	CMGC_GSK	47.127	55.263	72.32	93.203	104.923	124.677
CIL1231S0031	CMGC_GSK	29.753	40.563	53.62	55.577	65.08	80.317
CIL1075S0064	CMGC_GSK	21.07	23.5	54.02	42.647	56.523	56.85
CIL0967S0151	CMGC_GSK	10.023	10.66	19.733	20.01	19.763	24.273
CIL1306S0047	CMGC_GSK	63.777	70.56	79.283	46.93	36.427	14.18
CIL1406S0036	CMGC_MAPK	49.837	62.023	97.54	153.077	190.613	277.963
CIL1197S0077	CMGC_MAPK	27.017	31.703	60.77	56.68	67.117	55.13
CIL1411S0014	CMGC_MAPK	6.507	9.447	43.567	44.12	45.433	52.513
CIL1094S0022	CMGC_MAPK	14.23	17.917	21.517	23.95	26.24	52.083
CIL1251S0042	CMGC_MAPK	14.54	23.633	45.68	30.903	24.597	15.417
CIL1507S0030	CMGC_MAPK	7.653	10.163	16.427	15.957	16.4	10.9
CIL1497S0005	CMGC_MAPK	20.297	18.58	17.13	13.153	9.063	4.733
CIL0893S0029	CMGC_SRPK	7.223	7.213	5.807	4.51	3.657	0.887
CIL1403S0050	Group-Pl-2	4.95	6.74	1.873	2.117	2.183	0.823
CIL0962S0129	Group-Pl-3	3.37	8.307	9.21	6.143	6.067	4.703
CIL1032S0005	Group-Pl-4	255.59	293.447	193.85	160.437	125.783	55.803
CIL1161S0008	Group-Pl-4	8.993	38.713	25.44	21.323	35.87	22.05
CIL1445S0032	NEK	3.737	3.82	1.567	2.083	3.7	9.693
CIL1047S0125	NEK	29.913	16.867	19.117	16.24	13.677	5.07
CIL1465S0027	NEK	7.807	3.623	2.853	1.12	1.44	0.25
CIL0976S0015	NEK	6.357	3.873	1.537	1.957	0.913	0.213
CIL1343S0049	PEK_PEK	67.577	64.093	47.04	48.133	40.9	16.797
CIL1503S0013	RLK-Pelle_CR4L	5.503	3.67	15.17	14.833	11.067	8.417
CIL1031S0140	RLK-Pelle_CR4L	10.763	6.523	10.877	11.487	5.68	2.773
CIL0976S0073	RLK-Pelle_CR4L	5.42	5.827	4.447	3.95	3.187	1.933
CIL1081S0022	RLK-Pelle_CR4L	6.237	6.263	4.983	3.05	2.52	1.237
CIL0996S0013	RLK-Pelle_CrRLK1L-1	8.88	9.683	23.673	23.09	18.62	19.79
CIL0568S0001	RLK-Pelle_CrRLK1L-1	25.123	25.49	60.427	42.07	38.573	15.35
CIL1546S0029	RLK-Pelle_CrRLK1L-1	3.737	3.103	5.7	6.737	6.357	14.533
CIL0895S0004	RLK-Pelle_CrRLK1L-1	29.01	10.457	4.463	22.347	25.427	9.84
CIL0951S0111	RLK-Pelle_CrRLK1L-1	8.24	8.55	20.803	14.063	13.293	5.103
CIL0990S0002	RLK-Pelle_CrRLK1L-1	10.93	12.57	20.71	12.907	10.11	4.493
CIL0909S0241	RLK-Pelle_CrRLK1L-1	2.403	2.483	7.28	8.507	5.847	3.857
CIL1101S0002	RLK-Pelle_CrRLK1L-1	11.41	7.657	0.447	7.387	9.727	2.24
CIL1321S0046	RLK-Pelle_CrRLK1L-1	7.217	6.597	6.89	4.04	4.587	0.713
CIL1286S0036	RLK-Pelle_CrRLK1L-1	5.613	2.433	1.72	0.867	1.04	0.313
CIL1393S0001	RLK-Pelle_CrRLK1L-1	0.237	1.863	6.13	2.827	1.21	0.023
CIL0452S0002	RLK-Pelle_DLSV	3.887	11.813	59.593	59.807	72.437	164.25
CIL1084S0022	RLK-Pelle_DLSV	41.877	35.947	95.783	81.627	65.243	125.37
CIL0914S0154	RLK-Pelle_DLSV	6.227	6.43	22.17	31.18	38.13	74.62
CIL1001S0055	RLK-Pelle_DLSV	1.08	3.56	11.193	17.123	29.36	54.557
CIL0247S0009	RLK-Pelle_DLSV	5.87	13.08	133.143	71.973	82.797	51.223
CIL1084S0021	RLK-Pelle_DLSV	0.387	1.387	8.26	14.363	14.847	46.823
CIL0393S0001	RLK-Pelle_DLSV	14.697	13.037	3.467	17.66	18.103	41.487
CIL1050S0078	RLK-Pelle_DLSV	7.23	6.88	14.357	20.963	25.29	40.763
CIL1122S0041	RLK-Pelle_DLSV	12.763	21.683	27.22	23.967	22.12	38.75
CIL1184S0048	RLK-Pelle_DLSV	0.92	3.287	5.373	12.817	20.093	37.827
CIL0914S0153	RLK-Pelle_DLSV	4.173	6.207	11.317	14.22	19.017	34.747
CIL1076S0104	RLK-Pelle_DLSV	12.933	17.447	25.247	20.153	23.357	26.043
CIL0953S0080	RLK-Pelle_DLSV	2.97	4.12	2.263	3.98	10.06	24.533
CIL1114S0012	RLK-Pelle_DLSV	1.777	4.46	11.55	12.127	16.713	24.34
CIL1009S0101	RLK-Pelle_DLSV	1.813	2.323	7.113	9.317	11.73	22.717
CIL1028S0002	RLK-Pelle_DLSV	0.493	0.527	0.743	3.77	5.903	21.877
CIL0411S0002	RLK-Pelle_DLSV	2.593	8.857	47.56	75.46	76.507	21.833
CIL0945S0164	RLK-Pelle_DLSV	5.047	8.293	7.357	11.563	13.26	21.32
CIL0899S0037	RLK-Pelle_DLSV	15.327	19.947	25.753	31.69	29.967	19.223
CIL1048S0056	RLK-Pelle_DLSV	4.373	3.92	7.303	8.253	12.817	19.023
CIL0198S0026	RLK-Pelle_DLSV	6.927	8.113	4.87	9.267	11.547	18.54
CIL1551S0015	RLK-Pelle_DLSV	6.097	6.4	13.91	14.317	15.29	17.573
CIL1135S0031	RLK-Pelle_DLSV	19.947	15.097	38.11	73.117	72.313	17.233
CIL1405S0078	RLK-Pelle_DLSV	36.713	32.937	35.343	43.427	43.583	15.05
CIL0957S0149	RLK-Pelle_DLSV	4.75	8.073	10.82	7.413	7.307	14.823
CIL0123S0001	RLK-Pelle_DLSV	0.067	0.23	1.38	3.347	6.927	14.097
CIL1171S0045	RLK-Pelle_DLSV	9.437	10.413	12.767	18.447	23.063	13.743
CIL0914S0155	RLK-Pelle_DLSV	0.847	1.2	2.573	4.267	5.13	12.347
CIL0978S0059	RLK-Pelle_DLSV	2.537	2.807	3.853	8.117	9.917	11.84
CIL1300S0014	RLK-Pelle_DLSV	5.27	6.567	7.98	10.333	11.09	8.397
CIL1546S0061	RLK-Pelle_DLSV	8.687	4.68	4.147	9.75	8.317	8.107
CIL0895S0064	RLK-Pelle_DLSV	0.177	0.43	1.173	1.893	3.28	8.01
CIL0123S0008	RLK-Pelle_DLSV	2.89	5.227	6.017	4.25	5.66	7.507
CIL1133S0070	RLK-Pelle_DLSV	15.097	9.23	12.077	25.607	21.363	7.277
CIL0974S0021	RLK-Pelle_DLSV	0.683	2.12	14.463	23.843	23.683	4.8
CIL0945S0082	RLK-Pelle_DLSV	9.693	13.947	31.453	17.137	12.087	4.727
CIL1020S0003	RLK-Pelle_DLSV	4.45	2.857	1.55	9.043	8.31	4.64
CIL1494S0056	RLK-Pelle_DLSV	2.3	3.217	12.493	9.87	10.73	4.47
CIL0925S0023	RLK-Pelle_DLSV	0.9	2.1	9.083	3.363	4.967	4.167
CIL1075S0002	RLK-Pelle_DLSV	10.897	9.343	0.36	4.07	6.197	4.13
CIL1025S0056	RLK-Pelle_DLSV	2.65	3.64	7.417	5.677	6.01	3.883
CIL0953S0089	RLK-Pelle_DLSV	4.077	7.627	8.783	6.81	6.857	3.717
CIL0895S0106	RLK-Pelle_DLSV	10.733	12.5	23.807	17.34	15.123	2.997
CIL1573S0005	RLK-Pelle_DLSV	7.7	1.37	0.75	5.127	2.813	1.487
CIL1366S0020	RLK-Pelle_DLSV	9.82	6.913	5.76	4.377	4.45	1.173
CIL0945S0080	RLK-Pelle_DLSV	0.32	0.55	5.983	8.707	7.383	1.043
CIL0974S0020	RLK-Pelle_DLSV	0.347	0.687	5.26	4.247	3.89	0.603
CIL1021S0046	RLK-Pelle_DLSV	0.287	5.263	15.95	5.207	2.52	0.503
CIL1239S0002	RLK-Pelle_DLSV	5.753	2.11	0.69	0.557	0.107	0.033
CIL1130S0018	RLK-Pelle_Extensin	11.147	14.463	7.513	6.37	3.567	5.727
CIL1330S0039	RLK-Pelle_Extensin	10.15	8.613	7.22	6.17	4.883	2.9
CIL1317S0066	RLK-Pelle_Extensin	3.09	7	3.213	1.813	0.67	0.39
CIL1440S0008	RLK-Pelle_Extensin	2.077	5.823	2.593	1.377	1.247	0.33
CIL1047S0081	RLK-Pelle_L-LEC	0.35	0.67	17.77	34.837	42.273	27.07
CIL1372S0010	RLK-Pelle_L-LEC	0.973	1.733	24.377	23.417	31.577	22.807
CIL0978S0141	RLK-Pelle_L-LEC	8.663	10.717	14.463	25.947	26.92	22.457
CIL0987S0030	RLK-Pelle_L-LEC	14.093	13.487	27.223	31.327	30.183	22.417
CIL1083S0027	RLK-Pelle_L-LEC	0.25	0.607	3.24	4.973	6.39	17.013
CIL0906S0101	RLK-Pelle_L-LEC	0.187	0.12	0.17	2.523	3.21	7.793
CIL1592S0009	RLK-Pelle_L-LEC	14.97	19.67	26.777	20.143	21.83	3.683
CIL1358S0004	RLK-Pelle_L-LEC	7.013	9.813	6.047	2.387	1.863	1.583
CIL1083S0004	RLK-Pelle_LRK10L-2	184.837	166.203	380.353	270.687	235.047	88.83
CIL1346S0028	RLK-Pelle_LRK10L-2	89.563	91.697	427.25	273.95	218.377	79.483
CIL1396S0004	RLK-Pelle_LRK10L-2	68.177	79.613	172.683	104.667	90.787	34.017
CIL1154S0079	RLK-Pelle_LRK10L-2	6.887	5.753	31.5	42.46	34.913	32.377
CIL1071S0063	RLK-Pelle_LRK10L-2	7.22	16.173	105.14	44.217	34.397	12.887
CIL0454S0007	RLK-Pelle_LRK10L-2	46.88	75.667	89.033	43.22	52.947	12.027
CIL1050S0012	RLK-Pelle_LRK10L-2	18.837	28.29	42.473	36.14	30.89	6.107
CIL0897S0175	RLK-Pelle_LRK10L-2	41.857	39.873	30.183	21.417	20.2	2.593
CIL0344S0023	RLK-Pelle_LRR-I-1	88.997	81.943	13.423	62.187	68.147	46.57
CIL1276S0004	RLK-Pelle_LRR-I-1	53.397	40.163	22.58	15.993	11.04	2.503
CIL0307S0013	RLK-Pelle_LRR-I-1	14.67	13.023	13.55	11.57	7.677	1.917
CIL1276S0005	RLK-Pelle_LRR-I-1	30.123	21.61	14.803	9.333	6.913	1.813
CIL0989S0068	RLK-Pelle_LRR-I-1	13.627	11.067	18.69	10.797	8.19	1.727
CIL1131S0100	RLK-Pelle_LRR-I-1	3.803	9.003	0.177	31.657	55.133	1.457
CIL1577S0043	RLK-Pelle_LRR-I-2	7.097	10.91	4.923	5.33	12.297	26.743
CIL0909S0203	RLK-Pelle_LRR-I-2	5.68	6.537	5.237	3.083	1.823	0.733
CIL1492S0038	RLK-Pelle_LRR-II	19.253	20.293	42.53	44.197	49.137	36.233
CIL1082S0050	RLK-Pelle_LRR-II	5.293	6.797	21.097	20.81	24.023	12.687
CIL1092S0121	RLK-Pelle_LRR-II	38.947	39.85	48.233	39.237	23.93	9.75
CIL1282S0022	RLK-Pelle_LRR-II	31.907	21.66	22.787	22.383	13.41	6.797
CIL0893S0283	RLK-Pelle_LRR-II	0.843	2.743	2.45	2.62	2.167	5.053
CIL0010S0023	RLK-Pelle_LRR-II	37.59	24.077	14.187	7.563	4.297	1.767
CIL1147S0095	RLK-Pelle_LRR-II	17.67	14.433	9.96	8.833	5.96	1.473
CIL1184S0010	RLK-Pelle_LRR-II	12.703	14.507	9.907	6.35	4.77	0.893
CIL0091S0004	RLK-Pelle_LRR-II	5.343	8.863	4.18	2.127	0.91	0.44
CIL0948S0105	RLK-Pelle_LRR-II	15.507	11.937	10.557	5.14	2.8	0.35
CIL1342S0024	RLK-Pelle_LRR-III	40.543	33	47.71	37.107	22.707	11.587
CIL1173S0072	RLK-Pelle_LRR-III	35.17	46.737	29.313	27.467	25.92	11.383
CIL1290S0041	RLK-Pelle_LRR-III	2.53	5.353	17.057	7.5	5.79	6.043
CIL1615S0016	RLK-Pelle_LRR-III	0.803	1.42	1.74	1.18	2.163	5.29
CIL0906S0030	RLK-Pelle_LRR-III	9.1	9.77	11.35	10.827	9.74	4.537
CIL1312S0019	RLK-Pelle_LRR-III	6.933	13.513	4.71	3.14	2.24	3.973
CIL1090S0028	RLK-Pelle_LRR-III	8.127	13.657	18.29	12.23	9.977	3.3
CIL0919S0046	RLK-Pelle_LRR-III	7.073	14.09	7.38	5.033	3.373	2.313
CIL1154S0074	RLK-Pelle_LRR-III	1.1	1.447	1.977	9.793	6.497	2.263
CIL1619S0012	RLK-Pelle_LRR-III	8.51	5.807	2.493	3.11	2.347	1.09
CIL0465S0002	RLK-Pelle_LRR-III	14.677	17.913	8.52	4.023	3.553	1.017
CIL1363S0018	RLK-Pelle_LRR-III	6.27	6.287	4.917	2.167	2.117	0.993
CIL1390S0029	RLK-Pelle_LRR-III	31.677	31.677	12.657	4.933	3.01	0.7
CIL1565S0020	RLK-Pelle_LRR-III	5.683	13.917	5.023	1.417	0.7	0.663
CIL1030S0126	RLK-Pelle_LRR-III	0.76	11.513	0.483	0.157	0.22	0.25
CIL1286S0033	RLK-Pelle_LRR-III	1.593	7.13	0.93	0.483	0.237	0.227
CIL1047S0114	RLK-Pelle_LRR-III	3.357	6.427	1.913	1.217	0.677	0.177
CIL0009S0021	RLK-Pelle_LRR-III	5.793	3.52	1.347	0.607	0.243	0.09
CIL1031S0030	RLK-Pelle_LRR-III	0.99	6.803	1.02	0.16	0.113	0.037
CIL0923S0083	RLK-Pelle_LRR-IV	0.857	1.063	2.85	5.573	2.83	4.29
CIL1100S0108	RLK-Pelle_LRR-IV	8.303	11.13	2.897	2.553	1.747	2.263
CIL1264S0063	RLK-Pelle_LRR-IV	5.68	5.843	4.69	3.087	2.38	1.153
CIL1328S0065	RLK-Pelle_LRR-IV	0.8	8.07	0.993	0.467	0.277	0.157
CIL1433S0005	RLK-Pelle_LRR-IX	21.203	14.45	17.847	16.773	13.197	8.73
CIL1060S0012	RLK-Pelle_LRR-IX	9.293	13.683	11.227	5.62	2.693	1.18
CIL0364S0012	RLK-Pelle_LRR-IX	6.727	11.017	4.237	1.237	0.56	0.477
CIL1526S0046	RLK-Pelle_LRR-V	1.127	3.573	3.73	3.68	5.57	7.903
CIL1143S0076	RLK-Pelle_LRR-V	45.31	36.277	37.85	24.81	13.493	6.28
CIL0902S0141	RLK-Pelle_LRR-V	13.113	13.23	10.8	7.91	6.58	3.25
CIL0998S0061	RLK-Pelle_LRR-V	34.083	29.41	16.993	10.56	8.943	1.82
CIL1187S0071	RLK-Pelle_LRR-VI-1	13.167	24.267	9.923	3.663	2.523	1.383
CIL1277S0031	RLK-Pelle_LRR-VI-1	23.657	24.88	9.343	6.927	2.953	1.14
CIL1105S0034	RLK-Pelle_LRR-VI-1	17.49	9.213	5.763	5.083	2.377	0.92
CIL1145S0085	RLK-Pelle_LRR-VI-1	5.747	6.437	3.49	2.417	1.563	0.747
CIL1229S0018	RLK-Pelle_LRR-VI-1	8.533	11.2	4.163	1.103	0.543	0.167
CIL1127S0040	RLK-Pelle_LRR-VI-2	19.497	22.703	70	85.62	103.277	134.543
CIL0893S0292	RLK-Pelle_LRR-VI-2	3.417	4.683	4.5	4.557	6.607	17.063
CIL0134S0022	RLK-Pelle_LRR-VI-2	42.253	32.53	59.413	49.73	39.45	16.867
CIL0972S0133	RLK-Pelle_LRR-VI-2	36.447	6.383	10.17	6.78	8.56	3.68
CIL1231S0043	RLK-Pelle_LRR-VI-2	4.577	5.87	5.493	2.74	2.103	1.183
CIL1197S0046	RLK-Pelle_LRR-VI-2	8.937	7.92	4.463	1.367	0.907	0.237
CIL1114S0080	RLK-Pelle_LRR-VI-2	13.203	2.117	3.197	1.953	1.85	0.037
CIL0993S0058	RLK-Pelle_LRR-VII-1	5.973	12.007	5.747	4.277	2.947	1.137
CIL0984S0025	RLK-Pelle_LRR-VII-1	4.263	12.307	3.2	1.127	0.697	0.24
CIL1231S0035	RLK-Pelle_LRR-VII-2	2.457	3.257	9.793	14.66	11.01	4.64
CIL0893S0289	RLK-Pelle_LRR-VII-2	10.443	7.813	7.467	5.14	4.277	1.477
CIL1306S0009	RLK-Pelle_LRR-VII-2	5.657	6.26	6.063	3.933	2.397	0.783
CIL0993S0023	RLK-Pelle_LRR-VIII-1	23.013	34.717	41.523	27.323	26.093	3.62
CIL1002S0129	RLK-Pelle_LRR-VIII-1	75.077	70.08	41.41	20.57	21.9	3.037
CIL1002S0134	RLK-Pelle_LRR-VIII-1	20.46	23.703	18.823	10.16	6.06	0.593
CIL1425S0048	RLK-Pelle_LRR-Xa	34.667	33.74	119.733	112.367	121.077	86.08
CIL0922S0101	RLK-Pelle_LRR-Xa	14.403	20.11	39.893	35.303	42.153	43.533
CIL1325S0062	RLK-Pelle_LRR-Xa	8.4	8.86	35.25	43.723	46.677	26.767
CIL1161S0026	RLK-Pelle_LRR-Xa	8.36	8.003	17.89	15.52	13.21	3.127
CIL1030S0082	RLK-Pelle_LRR-Xa	7.68	7.333	3.23	2.26	1.367	0.78
CIL0246S0018	RLK-Pelle_LRR-Xb-1	6.61	6.74	6.487	10.473	16.82	35.45
CIL1086S0049	RLK-Pelle_LRR-Xb-1	0.277	1.12	4.777	6.767	12.067	26.557
CIL0324S0017	RLK-Pelle_LRR-Xb-1	12.407	12.12	26.447	24.987	24.19	23.017
CIL1361S0045	RLK-Pelle_LRR-Xb-1	2.667	2.91	4.743	7.25	10.833	16.167
CIL0893S0367	RLK-Pelle_LRR-Xb-1	0.053	0.017	0.553	1.257	4.57	9.657
CIL1312S0044	RLK-Pelle_LRR-Xb-1	7.943	7.147	2.61	1.26	0.827	0.367
CIL0171S0002	RLK-Pelle_LRR-Xb-2	2.943	5.153	7.797	18.98	33	80.847
CIL1402S0034	RLK-Pelle_LRR-Xb-2	0.33	0.487	3	3.847	5.063	2.573
CIL0987S0132	RLK-Pelle_LRR-XI-1	0.553	1.933	18.647	39.54	41.48	51.15
CIL0170S0013	RLK-Pelle_LRR-XI-1	0.383	1.563	12.513	16.347	23.777	31.95
CIL1081S0074	RLK-Pelle_LRR-XI-1	1.703	2.71	16.163	26.597	24.35	22.463
CIL0282S0004	RLK-Pelle_LRR-XI-1	1.377	2.143	33.22	37.87	51.717	19.74
CIL1006S0055	RLK-Pelle_LRR-XI-1	8.387	22.787	194.593	127.32	159.04	13.667
CIL1293S0054	RLK-Pelle_LRR-XI-1	0.123	0.42	0.3	0.733	2.113	10.917
CIL1390S0007	RLK-Pelle_LRR-XI-1	4.12	5.72	39.683	28.79	22.733	10.01
CIL1402S0038	RLK-Pelle_LRR-XI-1	34.973	30.14	39.2	63.447	47.52	9.107
CIL1585S0002	RLK-Pelle_LRR-XI-1	17.52	22.523	58.953	35.52	27.657	6.693
CIL1416S0051	RLK-Pelle_LRR-XI-1	17.663	17.477	16.013	12.667	9.037	5.74
CIL1390S0008	RLK-Pelle_LRR-XI-1	3.047	3.29	15.147	11.793	11.313	5.003
CIL1526S0041	RLK-Pelle_LRR-XI-1	1.03	1.607	17.407	16.963	26.367	4.133
CIL1055S0087	RLK-Pelle_LRR-XI-1	11.327	8.393	6.663	7.74	6.05	3.33
CIL1242S0028	RLK-Pelle_LRR-XI-1	1.47	0.787	11.86	13.21	8.453	2.203
CIL1031S0141	RLK-Pelle_LRR-XI-1	8.47	8.22	18.98	11.5	5.08	2.06
CIL1503S0012	RLK-Pelle_LRR-XI-1	30.54	20.32	12.383	9.777	7.773	1.58
CIL1119S0029	RLK-Pelle_LRR-XI-1	3.73	6.38	2.977	2.023	1.66	1.203
CIL0951S0170	RLK-Pelle_LRR-XI-1	44.37	42.183	14.983	8.567	6.227	1.103
CIL1454S0055	RLK-Pelle_LRR-XI-1	16.337	18.4	5.247	2.033	1.48	1.09
CIL0291S0001	RLK-Pelle_LRR-XI-1	0.35	1.137	17.093	15.767	18.897	0.847
CIL1130S0047	RLK-Pelle_LRR-XI-1	0.643	0.397	6.58	6.23	6.147	0.543
CIL0979S0177	RLK-Pelle_LRR-XI-1	23.503	22.073	8.43	5.68	2.907	0.523
CIL0938S0143	RLK-Pelle_LRR-XI-1	17.607	16.947	5.453	2.623	0.767	0.483
CIL0937S0005	RLK-Pelle_LRR-XI-1	31.167	12.113	8.713	4.933	5.463	0.463
CIL0893S0368	RLK-Pelle_LRR-XI-1	13.257	10.787	3.453	1.773	0.533	0.453
CIL1386S0050	RLK-Pelle_LRR-XI-1	14.967	10.603	3.153	1.94	1.81	0.397
CIL0176S0010	RLK-Pelle_LRR-XI-1	4.357	7.523	3.477	1.177	1.16	0.373
CIL1034S0068	RLK-Pelle_LRR-XI-1	10.477	10.107	6.597	3.61	2.397	0.353
CIL1068S0102	RLK-Pelle_LRR-XI-1	8.793	4.4	8.887	5.25	2.21	0.207
CIL1310S0004	RLK-Pelle_LRR-XI-1	0.347	0.38	5.69	2.38	1.463	0.183
CIL1098S0003	RLK-Pelle_LRR-XI-1	0.127	0.243	5	1.957	1.293	0.11
CIL1198S0027	RLK-Pelle_LRR-XI-2	4.887	6.063	13.137	15.827	19.58	19.84
CIL1321S0049	RLK-Pelle_LRR-XII-1	0.183	2.947	9.55	13.903	16.723	10.427
CIL1370S0002	RLK-Pelle_LRR-XII-1	0.01	0.067	0.12	1.707	3.347	7.06
CIL1157S0056	RLK-Pelle_LRR-XIIIa	57.38	51	38.567	35.09	31.64	13.273
CIL1193S0038	RLK-Pelle_LRR-XIIIa	0.317	0.283	0.99	0.903	0.983	5.737
CIL0902S0049	RLK-Pelle_LRR-XIIIa	26.907	21.17	14.95	9.68	8.97	2.347
CIL0183S0010	RLK-Pelle_LRR-XIIIb	6.137	11.55	2.127	1.44	0.86	0.413
CIL1271S0048	RLK-Pelle_LRR-XIIIb	2.217	10.767	0.883	0.51	0.267	0.123
CIL1315S0017	RLK-Pelle_LRR-XIV	6.757	8.853	56.597	72.183	79.723	75.06
CIL0125S0004	RLK-Pelle_LRR-XIV	3.183	4.307	5.613	8.667	15.69	18.047
CIL1286S0016	RLK-Pelle_LRR-XIV	57.763	32.093	64.8	38.313	21.257	7.447
CIL0838S0001	RLK-Pelle_LRR-XIV	11.313	5.453	7.36	6.257	3.023	0.863
CIL1144S0028	RLK-Pelle_LRR-XV	5.823	6.467	8.453	8.137	7.003	20.527
CIL1153S0068	RLK-Pelle_LysM	3.05	5.103	19.163	31.27	47.4	79.35
CIL1464S0020	RLK-Pelle_LysM	1.767	1.833	10.95	23.81	28.03	61.11
CIL1112S0095	RLK-Pelle_LysM	5.827	6.89	11.817	16.037	24.607	55.037
CIL1473S0003	RLK-Pelle_LysM	1.947	3.647	2.85	3.107	2.923	6.57
CIL1543S0011	RLK-Pelle_PERK-1	2.857	4.93	8.83	13.85	16.877	25.443
CIL1218S0031	RLK-Pelle_PERK-1	7.623	6.883	12.24	17.863	15.33	20.037
CIL1184S0039	RLK-Pelle_PERK-1	6.883	9.307	6.58	5.317	4.217	3.047
CIL0010S0006	RLK-Pelle_PERK-1	8.233	7.3	4.983	4.133	2.713	1.737
CIL1317S0050	RLK-Pelle_PERK-2	14.6	22.56	15.96	14.12	8.08	5.29
CIL0938S0048	RLK-Pelle_RKF3	32.143	30.627	50.167	74.753	83.157	93.53
CIL1087S0081	RLK-Pelle_RKF3	3.687	2.917	5.073	10.813	15.4	49.34
CIL1164S0087	RLK-Pelle_RKF3	0.047	0.1	0.187	1.467	7.163	31.377
CIL0644S0034	RLK-Pelle_RKF3	13.013	7.943	9.41	10.953	10.67	4.7
CIL1082S0106	RLK-Pelle_RKF3	1.133	1.713	3.853	4.233	5.68	2.607
CIL1324S0053	RLK-Pelle_RLCK-II	27.483	24.883	37.683	47.07	55.89	78.52
CIL1197S0085	RLK-Pelle_RLCK-IV	49.25	58.097	94.907	87.773	87.433	114.443
CIL1584S0005	RLK-Pelle_RLCK-IV	19.26	18.113	61.213	51.15	58.05	67.517
CIL0982S0017	RLK-Pelle_RLCK-IV	42.073	45.577	92.047	89.42	92.27	49.57
CIL0064S0025	RLK-Pelle_RLCK-IV	3.907	2.563	3.637	6.533	15.517	38.253
CIL0948S0049	RLK-Pelle_RLCK-IXa	6.283	10.237	3.367	2.703	1.787	0.547
CIL0009S0020	RLK-Pelle_RLCK-IXb	20.15	21.447	24.86	33.537	38.79	42.953
CIL0940S0108	RLK-Pelle_RLCK-IXb	19.4	16.23	63.17	46.933	48.26	30.103
CIL1173S0045	RLK-Pelle_RLCK-IXb	9.363	10.07	28.67	28.167	25.017	30.007
CIL0061S0012	RLK-Pelle_RLCK-IXb	32.47	25.067	49.54	47.19	49.12	8.097
CIL1329S0001	RLK-Pelle_RLCK-IXb	2.66	2.937	11.383	7.84	9.4	6.597
CIL0049S0022	RLK-Pelle_RLCK-IXb	12.093	9.27	7.777	6.703	5.25	3.657
CIL1330S0058	RLK-Pelle_RLCK-IXb	2.587	5.333	3.75	1.573	1.77	1.203
CIL1424S0013	RLK-Pelle_RLCK-Os	3.223	3.66	14.53	19.497	22.133	51.79
CIL1424S0012	RLK-Pelle_RLCK-Os	0.807	1.573	13.183	10.023	8.82	5.367
CIL0899S0089	RLK-Pelle_RLCK-V	35.95	25.6	22.22	22.863	13.733	4.31
CIL0917S0149	RLK-Pelle_RLCK-V	22.82	16.547	19.987	16.74	7.647	3.49
CIL0982S0034	RLK-Pelle_RLCK-V	73.26	34.403	17.373	13.017	14.53	3.19
CIL0893S0191	RLK-Pelle_RLCK-V	10.653	8.287	8.343	7.46	4.92	2.28
CIL1594S0006	RLK-Pelle_RLCK-V	19.96	9.61	9.207	7.043	5.927	2
CIL1037S0068	RLK-Pelle_RLCK-V	38.533	19.103	22.7	14.73	12.277	1.84
CIL0982S0035	RLK-Pelle_RLCK-V	28.83	13.71	7.97	5.38	5.103	1.397
CIL0205S0009	RLK-Pelle_RLCK-V	5.683	1.887	1.477	1.227	1.24	0.39
CIL1197S0075	RLK-Pelle_RLCK-V	5.05	1.82	1.007	0.627	0.717	0.16
CIL1132S0014	RLK-Pelle_RLCK-VI	17.533	15.287	26.3	40.213	45.717	85.43
CIL0937S0011	RLK-Pelle_RLCK-VI	1.027	1.067	2.55	6.74	11.577	15.91
CIL0047S0014	RLK-Pelle_RLCK-VI	26.883	17.67	6.533	5.447	4.247	4.36
CIL0899S0147	RLK-Pelle_RLCK-VI	44.383	39.233	20.793	18.163	15.373	3.407
CIL1253S0017	RLK-Pelle_RLCK-VI	11.953	12.28	11.497	6.737	4.687	2.487
CIL1003S0036	RLK-Pelle_RLCK-VI	2.223	8.413	4.25	1.16	0.79	0.907
CIL1173S0050	RLK-Pelle_RLCK-VI	5.71	8.29	2.557	1.167	1.28	0.843
CIL1154S0026	RLK-Pelle_RLCK-VI	5.7	6.193	3.08	1.15	0.773	0.34
CIL0112S0019	RLK-Pelle_RLCK-VIIa-1	12.003	13.98	22.073	22.49	25.017	35.62
CIL0996S0024	RLK-Pelle_RLCK-VIIa-1	10.047	14.977	13.637	21.967	22.37	33.817
CIL0917S0140	RLK-Pelle_RLCK-VIIa-1	6.357	8.357	12.51	14.627	13.677	15.857
CIL1546S0048	RLK-Pelle_RLCK-VIIa-1	8.937	8.863	8.117	6.413	5.297	1.877
CIL1499S0043	RLK-Pelle_RLCK-VIIa-2	2.967	5	30.743	123.877	160.2	131.557
CIL1535S0027	RLK-Pelle_RLCK-VIIa-2	30.047	31.14	86.497	57.63	49.53	64.177
CIL1106S0032	RLK-Pelle_RLCK-VIIa-2	3.26	2.797	13.257	21.1	31.06	60.373
CIL1457S0001	RLK-Pelle_RLCK-VIIa-2	9.923	9.657	28.563	33.057	32.547	56.783
CIL1611S0017	RLK-Pelle_RLCK-VIIa-2	0.58	1.12	4.85	14.203	25.057	52.627
CIL0990S0142	RLK-Pelle_RLCK-VIIa-2	5.147	8.207	15.88	23.677	33.313	51.42
CIL1048S0074	RLK-Pelle_RLCK-VIIa-2	7.273	7.073	21.947	24.54	33.053	51.123
CIL1264S0007	RLK-Pelle_RLCK-VIIa-2	3.457	3.903	13.52	12.447	21.147	48.343
CIL1128S0055	RLK-Pelle_RLCK-VIIa-2	10.703	13.03	20.037	32.933	40.71	44.78
CIL1304S0038	RLK-Pelle_RLCK-VIIa-2	11.773	11.677	28.01	36.467	42.163	39.35
CIL1196S0036	RLK-Pelle_RLCK-VIIa-2	16.267	20.233	34.667	31.567	33.643	31.807
CIL0967S0175	RLK-Pelle_RLCK-VIIa-2	0.667	1.493	3.377	11.377	17.33	24.347
CIL1324S0017	RLK-Pelle_RLCK-VIIa-2	30.337	33.547	30.203	26.203	21.09	13.08
CIL1525S0040	RLK-Pelle_RLCK-VIIa-2	6.56	7.057	12.94	19.77	23.7	11.62
CIL0902S0216	RLK-Pelle_RLCK-VIIa-2	3.88	6.907	29.827	23.923	20.21	11.583
CIL1012S0097	RLK-Pelle_RLCK-VIIa-2	1.743	2.357	18.357	16.313	19.613	11.49
CIL1094S0060	RLK-Pelle_RLCK-VIIa-2	10.213	10.87	23.74	16.423	11.507	10.927
CIL1602S0001	RLK-Pelle_RLCK-VIIa-2	6.173	2.137	22.6	22.983	27.69	7.117
CIL0922S0210	RLK-Pelle_RLCK-VIIa-2	19.167	14.88	23.957	26.23	27.393	5.813
CIL1358S0009	RLK-Pelle_RLCK-VIIa-2	9.647	7.967	7.183	5.093	5.27	1.83
CIL0909S0055	RLK-Pelle_RLCK-VIIa-2	6.863	9.097	16.99	10.36	7.213	0.96
CIL0897S0043	RLK-Pelle_RLCK-VIIb	8.943	5.293	2.687	3.433	2.71	1.027
CIL1519S0027	RLK-Pelle_RLCK-XI	6.557	10.847	13.673	27.29	24.43	28.633
CIL1328S0030	RLK-Pelle_RLCK-XI	15.837	15.273	7.727	4.853	3.45	2.487
CIL1030S0022	RLK-Pelle_RLCK-XI	9.953	9.67	10.353	3.92	2.547	1.76
CIL0917S0064	RLK-Pelle_RLCK-XII-1	14.51	26.43	35.813	30.643	30.903	40.983
CIL0156S0021	RLK-Pelle_RLCK-XII-1	6.513	9.147	11.38	23.65	27.22	26.923
CIL0381S0008	RLK-Pelle_RLCK-XII-1	0.03	1.19	0.21	1.883	7.617	23.013
CIL1318S0014	RLK-Pelle_RLCK-XII-1	14.89	19.2	24.973	29.487	31.34	13.69
CIL1295S0047	RLK-Pelle_RLCK-XII-2	0.957	1.447	13.687	20.137	15.44	25.657
CIL1295S0050	RLK-Pelle_RLCK-XII-2	0.32	0.49	9.753	8.66	7.253	10.64
CIL1100S0112	RLK-Pelle_RLCK-XII-2	2.547	2.703	17.62	10.23	10.81	3.947
CIL0895S0168	RLK-Pelle_RLCK-XVI	12.503	9.47	6.493	2.767	2.04	1.113
CIL1512S0004	RLK-Pelle_SD-2b	1.753	1.003	6.117	21.353	26.173	69.723
CIL1181S0005	RLK-Pelle_SD-2b	1.703	4.093	30.6	35.007	51.417	56.36
CIL0984S0051	RLK-Pelle_SD-2b	0.473	1.35	8.9	9.153	9.31	20.833
CIL1021S0037	RLK-Pelle_SD-2b	4.257	4.837	9.843	12.267	14.11	15.647
CIL1519S0014	RLK-Pelle_SD-2b	0.08	0.15	1.103	1.11	2.2	7.597
CIL1400S0018	RLK-Pelle_SD-2b	0.283	1.74	5.403	8.2	11.207	6.567
CIL1265S0021	RLK-Pelle_SD-2b	12.02	12.737	14.167	11.223	8.9	2.91
CIL1332S0005	RLK-Pelle_SD-2b	11.83	12.027	5.767	4.193	3.657	2.537
CIL1582S0030	RLK-Pelle_SD-2b	1.5	1.713	7.95	5.673	6.393	1.053
CIL0962S0128	RLK-Pelle_SD-2b	0.733	1.593	9.263	3.013	3.293	0.36
CIL1582S0028	RLK-Pelle_SD-2b	0.637	0.547	5.017	4.847	3.103	0.21
CIL0895S0206	RLK-Pelle_Singleton	5.367	5.09	4.043	2.907	2.323	0.76
CIL1056S0002	RLK-Pelle_URK-2	0	0.15	0.197	0.47	1.023	8.607
CIL1519S0002	RLK-Pelle_WAK	19.157	31.287	124.377	101.587	82.67	39.187
CIL1386S0001	RLK-Pelle_WAK	3.827	4.423	22.69	21.58	24.737	7.52
CIL1619S0010	RLK-Pelle_WAK_LRK10L-1	14.81	27.307	112.587	77.937	71.827	124.74
CIL1551S0002	RLK-Pelle_WAK_LRK10L-1	6.743	9.31	34.333	44.833	72.89	116.037
CIL0993S0093	RLK-Pelle_WAK_LRK10L-1	10.157	10.157	11.96	34.777	55.723	103.007
CIL0030S0018	RLK-Pelle_WAK_LRK10L-1	12.92	10.937	31.713	22.387	19.23	18.067
CIL0990S0174	RLK-Pelle_WAK_LRK10L-1	0.29	0.367	1.69	1.913	4.53	15.65
CIL0970S0153	RLK-Pelle_WAK_LRK10L-1	4.277	4.08	6.34	9.543	13.487	10.847
CIL0942S0182	RLK-Pelle_WAK_LRK10L-1	3.2	3.33	3.813	7.793	8.707	7.303
CIL1409S0031	RLK-Pelle_WAK_LRK10L-1	2.147	1.663	7.863	8.773	7.303	6.363
CIL1369S0007	RLK-Pelle_WAK_LRK10L-1	16.667	19.553	25.207	16.257	9.44	5.167
CIL0967S0155	RLK-Pelle_WAK_LRK10L-1	4.243	9.083	9.093	4.993	3.21	0.993
CIL1391S0026	STE_STE11	0.22	0.337	1.263	3.667	13.443	84.773
CIL1082S0003	STE_STE11	24.86	25.613	49.87	59.557	73.207	79.633
CIL0135S0010	STE_STE11	2.093	2.323	8.983	14.3	20.727	65.717
CIL1060S0073	STE_STE11	13.35	15.22	29.907	26.583	28.107	40.113
CIL1326S0040	STE_STE11	13.19	15.42	24.017	22.85	26.397	36.083
CIL0145S0010	STE_STE11	1.147	2.473	7.1	13.637	24.29	25.27
CIL1197S0011	STE_STE11	49.127	49.407	45.783	38.16	33.24	21.907
CIL0909S0127	STE_STE11	10.25	10.013	29.903	20.137	22.987	18.08
CIL1611S0005	STE_STE11	16.09	7.437	8.413	8.767	10.08	5.67
CIL0942S0004	STE_STE11	0.087	0.28	1.623	2.11	2.133	5.267
CIL1371S0004	STE_STE11	6.163	8.417	8.153	3.56	3.513	1.78
CIL1171S0006	STE_STE20-Fray	14.393	15.243	16.647	17.373	16.683	6.223
CIL1167S0055	STE_STE7	25.58	28.44	44.867	92.427	143.193	200.573
CIL0149S0012	STE_STE7	6	7.183	46.88	44.427	60.2	136.36
CIL0902S0136	STE_STE7	12.65	16.323	21.827	20.98	27.337	36.873
CIL1604S0014	STE_STE7	61.007	73.163	41.64	18.66	15.457	7.347
CIL0909S0025	TKL_CTR1-DRK-2	14.24	17.68	27.793	28.55	35.6	53.97
CIL0235S0010	TKL_CTR1-DRK-2	45.503	60.283	45.14	38.987	40.383	14.033
CIL1152S0020	TKL_CTR1-DRK-2	28.163	28.78	22.41	17.79	16.25	11.84
CIL1134S0036	TKL_CTR1-DRK-2	13.583	11.26	8.34	8.453	6.15	6.217
CIL1092S0018	TKL_CTR1-DRK-2	11.237	10.48	8.173	6.96	6.867	5.22
CIL1175S0063	TKL_CTR1-DRK-2	10.89	8.44	9.307	6.73	5.46	2.223
CIL0039S0009	TKL_CTR1-DRK-2	9.237	9.067	7.57	6.223	4.373	2.07
CIL0919S0040	TKL_Gdt	7.633	9.513	12.637	24.01	33.757	65.153
CIL1226S0042	TKL-Pl-1	10.3	12.33	19.207	23.42	26.747	30.47
CIL1153S0045	TKL-Pl-2	13.517	16.51	36.887	34.713	40.18	61.447
CIL1153S0015	TKL-Pl-4	61.897	65.15	46.437	52.137	73.787	147.367
CIL1282S0021	TKL-Pl-4	33.05	38.943	67.753	72.18	77.513	65.94
CIL0319S0009	TKL-Pl-4	38.803	42.447	56.477	43.357	29.427	14.863
CIL1526S0023	TKL-Pl-4	13.547	13.263	15.093	14.283	13.947	6.61
CIL1118S0062	TKL-Pl-4	13.117	13.217	14.68	12.693	10.61	6.543
CIL0410S0003	TKL-Pl-4	21.21	22.107	22.377	12.463	7.573	5.65
CIL1310S0043	TKL-Pl-4	5.65	8.74	3.777	2.363	2.397	1.403
CIL1009S0084	TKL-Pl-4	7.623	6.277	10.31	6.31	5.963	1.377
CIL1263S0020	TKL-Pl-4	6.69	6.827	3.317	2.357	1.667	1.187
CIL1084S0026	TKL-Pl-5	9.1	10.343	24.99	23.25	31.653	49.32
CIL0202S0003	TKL-Pl-6	15.143	14.867	14.65	24.053	30.873	48.013
CIL1060S0056	TTK	1.817	4.927	2.747	2.587	3.963	5.75
CIL1429S0039	WNK_NRBP	26.117	53.62	88.05	153.067	155.727	200.017
CIL1226S0053	WNK_NRBP	6.71	9.58	18.87	39.273	35.34	43.68
CIL0319S0005	WNK_NRBP	6.617	7.293	6.68	8.337	12.687	23.713
CIL1061S0097	WNK_NRBP	23.653	23.403	28.907	22.99	11.963	7.097
CIL1483S0025	WNK_NRBP	0.22	0.307	0.483	1.49	1.927	5.387
CIL1326S0005	WNK_NRBP	85.007	62.773	33.833	21.443	22.443	1.723

## Sheet: Table S6
Table S6. Differentially expressed TF genes of pecan seedlings in response to drought.
Gene ID	Gene family	0 d	3 d	6 d	9 d	12 d	15 d
CIL1167S0047	Alfin-like	20.927	25.157	22.16	14	13.537	8.393
CIL1119S0076	Alfin-like	19.26	20.607	21.093	14.887	14.19	7.58
CIL0945S0100	Alfin-like	16.813	22.043	16.477	12.773	10.623	7.46
CIL0307S0016	AP2/ERF-AP2	5.683	4.097	2.68	1.81	1.973	0.557
CIL0902S0177	AP2/ERF-ERF	48.91	31.563	118.463	124.52	161.373	665.073
CIL0416S0009	AP2/ERF-ERF	148.997	171.93	383.233	437.953	431.35	398.793
CIL1282S0045	AP2/ERF-ERF	5.263	3.33	23.447	44.697	74.473	195.683
CIL0893S0345	AP2/ERF-ERF	0.263	0.507	1.213	7.06	36.497	157.833
CIL0990S0040	AP2/ERF-ERF	15.947	19.52	28.46	54.837	62.06	149.26
CIL0009S0027	AP2/ERF-ERF	33.32	29.6	63.21	78.423	67.633	149.09
CIL1277S0064	AP2/ERF-ERF	2.227	3.737	16.62	47.373	63.773	139.073
CIL0324S0014	AP2/ERF-ERF	0.303	0.32	1.413	6.537	15.137	129.083
CIL1169S0007	AP2/ERF-ERF	1.087	0.7	8.877	24.987	44.173	114.54
CIL0818S0001	AP2/ERF-ERF	31.893	35.353	55.113	58.99	60.543	83.033
CIL0893S0378	AP2/ERF-ERF	2.867	4.28	17.2	22.593	25.88	65.397
CIL0118S0004	AP2/ERF-ERF	10.567	19.433	41.823	38.52	39.227	60.243
CIL1259S0035	AP2/ERF-ERF	3.773	5.833	7.643	14.127	31.867	54.483
CIL1032S0063	AP2/ERF-ERF	0.547	0.787	6.957	19.927	19.383	54.233
CIL1086S0026	AP2/ERF-ERF	1.057	1.457	23.99	39.347	51.737	47.45
CIL1086S0063	AP2/ERF-ERF	4.193	4.507	20.187	27.933	21.387	40.603
CIL1354S0046	AP2/ERF-ERF	1.497	1.79	20.06	24.75	36.787	40.04
CIL0919S0014	AP2/ERF-ERF	0.88	0.58	0.937	4.24	10.263	36.543
CIL0864S0001	AP2/ERF-ERF	13.617	36.78	21.093	19.96	14.87	34.91
CIL1093S0003	AP2/ERF-ERF	0.117	0	0.203	0.61	4.397	34.64
CIL1312S0032	AP2/ERF-ERF	0.613	0.797	2.227	8.057	18.577	34.48
CIL0415S0001	AP2/ERF-ERF	2.283	4.443	8.313	9.313	12.273	33.57
CIL1254S0023	AP2/ERF-ERF	12.817	17.39	36.24	34.96	28.367	27.747
CIL1216S0073	AP2/ERF-ERF	6.69	10.167	19.777	28.337	24.563	26.383
CIL1030S0128	AP2/ERF-ERF	0.163	0.337	2.377	4.477	7.24	20.32
CIL1037S0047	AP2/ERF-ERF	0.34	0.417	1.337	2.633	2.3	17.497
CIL1568S0025	AP2/ERF-ERF	7.733	9.617	24.427	37.04	11.383	17.49
CIL1559S0015	AP2/ERF-ERF	2.62	2.027	1.31	4.257	5.8	15.6
CIL1146S0008	AP2/ERF-ERF	17.04	11.917	5.247	10.503	12.43	15.49
CIL1130S0074	AP2/ERF-ERF	1.163	1.103	10.603	33.027	27.883	15.483
CIL0893S0344	AP2/ERF-ERF	0.03	0.063	0.083	0.213	2.227	14.983
CIL0996S0066	AP2/ERF-ERF	1.693	0.933	1.403	5.037	8.687	14.44
CIL0987S0115	AP2/ERF-ERF	19.09	7.65	11.073	13.023	19.55	11.143
CIL1015S0081	AP2/ERF-ERF	1.04	0.39	1.533	1.703	1.44	8.593
CIL1071S0076	AP2/ERF-ERF	65.67	47.927	91.14	51.34	28.52	8.123
CIL1151S0015	AP2/ERF-ERF	5.72	10.887	23.897	15.617	9.277	7.57
CIL1130S0075	AP2/ERF-ERF	0.05	0.12	1.447	3.797	4.19	5.607
CIL1286S0052	AP2/ERF-ERF	12.173	20.953	16.577	14.243	12.777	5.01
CIL0937S0093	AP2/ERF-ERF	7.7	3.973	3.407	5.327	4.177	4.037
CIL1354S0048	AP2/ERF-ERF	0.467	0.273	0.777	3.957	7.593	3.017
CIL1312S0017	AP2/ERF-ERF	5.91	6.247	12.15	8.363	7.29	2.577
CIL0923S0133	AP2/ERF-ERF	0.89	1.16	7.063	4.063	1.303	2.12
CIL1568S0026	AP2/ERF-ERF	1.007	0.983	5.83	3.083	1.107	1.91
CIL1032S0131	AP2/ERF-ERF	0.923	2.583	6.23	4.69	1.21	1.84
CIL0009S0026	AP2/ERF-ERF	5.767	6.14	6.187	1.84	1.667	1.763
CIL0940S0117	AP2/ERF-ERF	5.423	7.623	3.047	2.53	1.86	1.317
CIL0940S0116	AP2/ERF-ERF	40.1	44.537	8.333	3.293	5.27	1.23
CIL0946S0064	AP2/ERF-ERF	15.797	11.857	8.86	6.84	1.053	0.51
CIL1588S0028	AP2/ERF-ERF	11.743	3.763	2.607	4.523	0.947	0.27
CIL0976S0125	AP2/ERF-ERF	5.843	2.02	1.12	0.437	0.447	0.143
CIL1358S0050	AP2/ERF-ERF	12.563	14.603	5.307	1.257	0.433	0.063
CIL0473S0009	AP2/ERF-RAV	12.48	14.527	45.933	24.22	15.563	6.373
CIL1484S0020	B3	23.057	31.787	48.563	34.92	19.05	17.17
CIL1226S0065	B3	2.933	4.127	6.537	6.507	8.547	15.45
CIL1607S0041	B3	2.57	3.543	4.497	5.027	6.26	9.407
CIL0320S0012	B3	3.097	4.007	5.927	7.053	6.4	8.767
CIL0897S0159	B3	14.947	16.55	16.517	12.333	10.757	6.223
CIL0024S0011	B3	21.98	20.473	17.107	13.437	10.677	3.577
CIL1164S0064	B3	6.203	8.18	7.867	6.657	5.463	2.89
CIL1222S0030	B3	6.03	8.207	3.76	2.533	1.53	0.383
CIL1277S0073	B3-ARF	170.987	191.447	169.633	122.68	114.113	46.993
CIL1002S0060	B3-ARF	35.403	63.793	85.283	60.95	58.473	18.523
CIL1216S0082	B3-ARF	65.903	55.447	47.017	42.36	34.887	11.893
CIL1615S0023	B3-ARF	28.277	29.677	52.033	35.063	16.21	11.653
CIL1479S0016	B3-ARF	26.277	28.653	32.99	22.707	13.623	9.007
CIL0010S0032	B3-ARF	27.25	39.963	26.59	19.81	15.01	8.53
CIL0940S0090	B3-ARF	28.083	39.717	30.507	21.28	14.473	7.973
CIL0948S0236	B3-ARF	0.177	1.883	0.617	1.103	1.86	5.823
CIL1166S0056	B3-ARF	19.44	14.63	19.36	10.22	6.803	3.657
CIL1043S0037	B3-ARF	13.237	7.653	8.36	6.367	6.293	3.197
CIL1564S0002	B3-ARF	9.433	19.57	13.697	7.583	3.85	2.29
CIL0948S0108	B3-ARF	4.84	5.31	6.58	5.51	3.81	2.23
CIL1490S0013	B3-ARF	13.073	13.297	13.79	8.207	4.77	1.99
CIL0893S0362	B3-ARF	27.257	30.703	21.703	10.227	5.61	1.82
CIL1196S0054	B3-ARF	55.517	22.617	15.433	13.467	11.337	1.69
CIL1076S0110	B3-ARF	6.16	4.693	4.253	3.2	2.59	1.253
CIL1112S0033	B3-ARF	13.583	18.17	7.873	3.403	2.947	0.793
CIL1060S0087	B3-ARF	5.127	4.113	4.707	3.5	2.803	0.753
CIL0908S0096	BBR-BPC	10.51	19.46	23.197	18.663	19.86	15.87
CIL1383S0002	BES1	20.703	29.23	30.007	27.29	24.607	45.857
CIL1449S0025	BES1	10.767	15.593	26.457	27.81	27.437	27.357
CIL0945S0021	BES1	2.81	4.403	5.65	5.323	7.143	17.5
CIL1316S0028	BES1	4.033	5.383	22.007	14.127	5.267	5.797
CIL1366S0034	BES1	17.34	20.313	13.11	11.79	10.36	4.153
CIL1032S0068	bHLH	17.803	20.203	26.007	27.107	30.343	38.357
CIL1575S0007	bHLH	30.733	24.46	53.613	61.933	38.537	34.697
CIL0368S0006	bHLH	15.18	15.55	24.697	30.76	28.047	22.153
CIL1279S0011	bHLH	1.017	0.617	10.383	6.683	4.64	15.877
CIL1497S0035	bHLH	0.823	3.28	7.027	24.34	21.123	14.657
CIL0942S0204	bHLH	51.027	58.06	47.66	36.5	30.527	14.58
CIL0917S0017	bHLH	39.343	43.937	37.277	33.173	28.66	12.887
CIL1107S0044	bHLH	11.17	24.23	22.92	27.637	26.17	12.203
CIL1149S0078	bHLH	19.82	17.287	14.273	10.817	7.623	8.073
CIL1031S0153	bHLH	19.26	24.897	15.647	17.033	20.177	7.69
CIL1211S0053	bHLH	1.1	1.167	16.643	9.963	12.963	7.41
CIL0948S0059	bHLH	34.64	41.277	33.627	26.447	21.793	7.243
CIL0906S0181	bHLH	1.61	1.797	3.787	2.847	2.83	6.81
CIL1596S0023	bHLH	17.49	18.923	23.74	17.36	10.34	6.787
CIL0908S0010	bHLH	31.22	24.777	23.303	12.75	8.197	5.9
CIL1149S0083	bHLH	12.687	12.94	9.967	11.487	10.247	5.893
CIL1495S0010	bHLH	29.03	32.757	23.47	18.79	15.98	5.55
CIL1436S0037	bHLH	1.3	0.89	4.463	4.233	4.227	5.45
CIL0967S0148	bHLH	1.79	1.373	7.297	2.603	2.067	5.187
CIL0974S0052	bHLH	13.187	13.963	14.417	14.913	10.75	5.15
CIL1134S0019	bHLH	15.443	25.077	19.7	11.147	9.707	4.77
CIL1122S0081	bHLH	36.283	25.92	14.153	13.707	12.987	4.483
CIL1089S0014	bHLH	15.073	20.857	32.657	16.433	5.963	4.213
CIL1101S0101	bHLH	1.233	6.387	0.213	0.36	0.947	4.203
CIL1495S0021	bHLH	10.273	7.02	6.19	3.917	3.57	3.207
CIL0199S0002	bHLH	16.42	15.157	10.073	6.72	5.15	2.993
CIL0134S0016	bHLH	15.273	11.223	17.81	16	14.89	2.983
CIL0970S0071	bHLH	6.153	11.873	8.707	6.217	4.957	2.87
CIL0945S0059	bHLH	3.26	16.943	4.717	9.95	6.573	2.85
CIL1104S0018	bHLH	2.827	3.25	8.313	6.303	5.753	2.42
CIL1353S0019	bHLH	99.497	51.063	43.157	23.907	11.783	2.353
CIL1099S0036	bHLH	12.11	11.707	8.717	4.763	3.547	2.273
CIL1087S0008	bHLH	39.787	12.793	10.74	7.817	5.34	2.01
CIL1190S0052	bHLH	26.033	22.157	4.423	2.43	2.163	1.977
CIL1303S0032	bHLH	4.4	5.02	4.737	4.367	3.22	1.777
CIL1047S0116	bHLH	10.52	10.717	10.697	6.497	2.727	1.553
CIL0909S0062	bHLH	9.533	23.11	12.627	5.217	7.6	1.053
CIL0909S0150	bHLH	5.357	1.853	3.47	3.757	2.463	0.987
CIL0935S0016	bHLH	0.64	0.607	1.377	5.81	3.747	0.927
CIL1148S0032	bHLH	79.617	42.877	14.097	7.053	2.83	0.653
CIL1136S0068	bHLH	0.34	6.667	2.067	0.39	3.957	0.473
CIL1399S0034	bHLH	1.78	2.12	18.277	3.347	0.563	0.453
CIL1021S0005	bHLH	1.64	5.83	1.3	0.683	0.607	0.297
CIL1083S0021	bHLH	7.62	27.047	7.853	2.17	0.933	0.287
CIL0176S0064	bHLH	3.47	21.183	2.157	0.33	0.153	0.087
CIL1018S0094	bHLH	5.797	2.66	1.28	0.293	0.063	0.07
CIL1205S0014	bHLH	2.063	10.027	0.313	0.03	0.013	0.053
CIL1294S0021	bZIP	49.213	53.98	110.123	111.393	123.5	162.113
CIL1003S0034	bZIP	35.017	36.733	45.6	60.88	69.523	124.32
CIL1219S0078	bZIP	13.073	18	45.647	71.283	71.217	114.97
CIL0972S0007	bZIP	20.403	26.81	27.25	25.207	44.283	106.143
CIL1034S0047	bZIP	35.32	52.3	53.66	58.65	62.807	79.777
CIL1148S0011	bZIP	36.22	38.747	86.13	123.75	113.267	77.93
CIL1330S0024	bZIP	28.127	29.56	36.373	57.04	65.4	74.52
CIL1136S0027	bZIP	25.917	30.92	48.023	47.55	44.99	59.68
CIL0979S0039	bZIP	34.96	40.59	62.01	69.45	70.653	55.477
CIL1158S0008	bZIP	13.233	16.38	41.98	38.35	30.457	38.96
CIL1326S0021	bZIP	14.48	17.677	33.107	46.93	59.533	38.32
CIL1094S0023	bZIP	2.137	8.337	14.08	27.28	24.4	32.35
CIL0073S0030	bZIP	13.107	15.167	17.09	24.333	25.39	30.003
CIL0948S0233	bZIP	9.017	8.88	14.043	16.407	17.1	25.567
CIL0979S0061	bZIP	14.523	18.527	36.09	27.623	30.467	24.09
CIL1439S0033	bZIP	6.273	8.673	9.677	13.62	16.127	19.257
CIL1607S0006	bZIP	28.41	31.877	28.683	23.017	17.95	11.16
CIL1047S0106	bZIP	0.073	0.21	0.397	1.95	3.457	8.853
CIL1009S0077	bZIP	33.25	27.027	27.693	20.733	17.32	7.797
CIL1210S0034	bZIP	2.94	2.68	3.183	1.567	3.303	6.567
CIL1064S0006	bZIP	0.053	0.207	0.917	2.497	2.7	6.13
CIL0086S0006	bZIP	18.89	26.987	18.66	12.12	7.3	5.787
CIL0978S0038	bZIP	10.537	11.277	12.223	8.017	6.523	4.407
CIL0976S0069	bZIP	16.39	12.137	10.937	11.763	12.613	4.083
CIL1169S0021	bZIP	8.59	8.917	7.347	5.923	5.34	3.963
CIL0919S0143	bZIP	5.687	6.403	4.543	3.253	3.907	0.75
CIL1156S0018	bZIP	7.23	3.963	2.483	2.183	1.26	0.55
CIL1235S0004	bZIP	2.78	6.883	1.01	1.163	3.697	0.163
CIL1434S0012	bZIP	7.46	6.657	2.207	0.917	1.493	0.147
CIL1031S0133	C2C2-CO-like	209.53	230.85	183.883	166.447	130.837	65.217
CIL1155S0003	C2C2-CO-like	121.19	139.257	123.797	100.69	91.067	58.28
CIL0984S0089	C2C2-CO-like	6.023	8.73	11.027	10.317	15.57	35.583
CIL0244S0001	C2C2-CO-like	76.647	62.987	46.173	45.607	45.933	28.047
CIL0099S0022	C2C2-CO-like	181.96	161.66	93.507	71.407	71.993	26.207
CIL0010S0025	C2C2-CO-like	169.413	203.933	109.533	64.55	50.64	12.123
CIL0224S0008	C2C2-CO-like	185.03	199.943	80.303	46.853	46.27	8.373
CIL0948S0107	C2C2-CO-like	65.26	68.463	51.773	37.793	29.88	3.253
CIL1387S0017	C2C2-CO-like	13.663	16.06	13.167	7.477	6.247	2.883
CIL1339S0020	C2C2-CO-like	107.52	59.663	29.21	16.317	8.207	0.95
CIL0957S0022	C2C2-Dof	9.86	8.227	14.997	38.363	50.873	62.04
CIL0893S0302	C2C2-Dof	0.283	1.34	3.363	5.433	14.463	29.45
CIL1258S0013	C2C2-Dof	89.783	86.49	35.713	23.403	17.037	12.093
CIL1187S0072	C2C2-Dof	1.637	2.98	3.337	4.183	4.88	7.133
CIL1031S0090	C2C2-Dof	25.293	23.617	16.8	12.97	10.543	5.673
CIL1231S0059	C2C2-Dof	3.543	3.877	9.423	6.8	9.61	4.967
CIL1001S0111	C2C2-Dof	8.767	9.027	9.963	7.97	6.223	3.8
CIL0893S0388	C2C2-Dof	5.703	7.35	12.793	9.507	3.517	3.57
CIL0163S0005	C2C2-Dof	2.047	4.22	8.337	4.703	3.923	3.24
CIL0893S0387	C2C2-Dof	14.863	14.013	14.637	10.85	6.833	2.973
CIL0929S0072	C2C2-Dof	9.493	4.063	7.717	7.737	7.17	2.947
CIL0923S0179	C2C2-Dof	14.147	12.617	13.107	10.43	9.193	2.64
CIL1137S0036	C2C2-Dof	17.18	13.2	7.477	7.557	5.2	1.753
CIL1298S0032	C2C2-Dof	7.397	9.403	6.967	4.327	3.4	1.287
CIL1171S0022	C2C2-Dof	6.9	7.023	5.263	4.38	1.757	1.197
CIL1098S0066	C2C2-Dof	4.197	6.01	3.873	2.297	2.503	0.757
CIL0938S0110	C2C2-Dof	4.067	8.317	8.2	2.38	1.303	0.587
CIL1038S0030	C2C2-GATA	22.603	28.07	50.3	53.92	57.617	67.21
CIL0978S0055	C2C2-GATA	3.473	7.007	20.077	28.49	36.987	56.213
CIL1009S0042	C2C2-GATA	39.993	30.453	20.83	12.953	10.283	20.853
CIL1259S0030	C2C2-GATA	37.633	34.783	30.4	30.72	28.4	15.873
CIL0026S0019	C2C2-GATA	92.14	106.543	65.843	57.66	52.283	13.027
CIL1189S0024	C2C2-GATA	41.93	36.01	29.027	24.253	18.79	9.59
CIL1603S0006	C2C2-GATA	20.07	20.61	18.137	12.817	9.373	5.863
CIL0948S0043	C2C2-GATA	16.603	17.673	10.127	10.223	7.64	5.137
CIL1134S0038	C2C2-GATA	8.09	7.52	9.863	8.673	8.733	3.103
CIL1438S0017	C2C2-GATA	30.67	30.853	18.713	9.723	5.623	2.007
CIL0752S0001	C2C2-GATA	9.513	8.667	3.283	3.717	2.473	1.19
CIL1515S0003	C2C2-GATA	5.067	6.147	4.17	2.687	2.263	1.073
CIL1348S0042	C2C2-GATA	21.973	19.933	11.793	5.427	2.157	0.91
CIL0893S0225	C2C2-GATA	4.533	11.683	1.57	0.27	0.293	0.16
CIL1137S0037	C2C2-LSD	13.22	15.96	18.303	23.95	28.617	54.167
CIL1499S0004	C2C2-YABBY	10.33	13.513	11.453	9.42	6.657	2.907
CIL1295S0014	C2C2-YABBY	10.72	23.693	9.15	7.093	4.28	2.21
CIL0053S0003	C2C2-YABBY	20.08	22.633	12.5	8.513	5.167	1.923
CIL1141S0047	C2C2-YABBY	6.65	6.28	4.077	2.343	1.573	0.517
CIL1175S0033	C2C2-YABBY	12.2	17.953	2.487	2.873	1.077	0.487
CIL1018S0068	C2C2-YABBY	20.907	21.253	4.187	2.707	0.877	0.287
CIL1570S0023	C2H2	0.773	1.2	7.29	16.873	77.807	359.88
CIL0207S0011	C2H2	28.227	35.65	135.913	191.95	179.407	263.473
CIL1371S0101	C2H2	5.393	7.743	50.51	81.477	81.507	234.607
CIL0990S0115	C2H2	0.59	2.187	4.253	18.323	63.637	220.073
CIL1390S0009	C2H2	17.027	21.63	45.59	52.907	64.617	89.22
CIL1112S0091	C2H2	10.783	13.433	23.353	26.453	35.217	78.317
CIL1456S0049	C2H2	6.78	7.327	31.857	36.357	45.443	68.717
CIL1001S0087	C2H2	0.397	0.98	19.633	48.063	69.113	63.82
CIL0990S0075	C2H2	4.193	6.01	17.073	13.47	17.863	31.693
CIL1096S0064	C2H2	14.017	15.473	24.82	22.477	22.857	28.037
CIL0908S0047	C2H2	62.363	89.62	71.857	59.593	49.063	27.857
CIL1023S0058	C2H2	8.357	9.643	12.057	14.72	16.253	26.243
CIL0422S0002	C2H2	0.743	1.24	4.783	5.86	6.627	22.21
CIL1317S0073	C2H2	59.377	59.797	58.537	69.047	62.46	19.333
CIL1055S0057	C2H2	35.03	41.997	31.803	41.61	30.09	14.943
CIL0143S0012	C2H2	3.053	8.673	25.633	31.547	21.13	14.653
CIL1306S0011	C2H2	19.343	20.39	47.533	32.867	27.57	13.61
CIL0893S0377	C2H2	33.08	34.913	25.647	24.04	23.05	13.42
CIL1534S0007	C2H2	66.017	64.033	45.383	32.587	25.873	13.2
CIL1131S0058	C2H2	28.103	31.543	32.53	39.5	31.237	13.017
CIL1246S0056	C2H2	1.057	0.58	1.7	4.44	5.367	12.097
CIL1229S0061	C2H2	21.41	22.533	22.373	19.85	16.367	8.277
CIL1055S0131	C2H2	21.083	19.293	28.987	21.427	12.27	8.16
CIL1222S0020	C2H2	31.503	28.573	16.42	16.49	13.243	7.737
CIL1149S0040	C2H2	2.13	1.66	5.007	6.42	6.52	7.353
CIL0086S0011	C2H2	7.157	10.69	15.46	12.567	9.62	7.343
CIL0922S0145	C2H2	1.8	2.93	3.803	7.3	6.723	6.877
CIL1274S0035	C2H2	1.247	1.253	2.98	4.527	5.12	6.363
CIL1198S0037	C2H2	10.753	11.993	11.287	10.56	8.867	5.32
CIL1031S0098	C2H2	39.78	26.69	26.707	24.527	21.78	4.997
CIL1205S0006	C2H2	104.56	91.057	45.46	25.603	15.72	4.46
CIL1452S0007	C2H2	2.05	2.747	7.087	4.903	7.227	3.693
CIL1220S0027	C2H2	8.917	11.063	7.403	6.377	5.39	3.453
CIL1144S0069	C2H2	14.373	12.57	10.727	8.307	7.717	3.377
CIL0895S0071	C2H2	8.983	11.6	9.633	10.5	6.567	3.133
CIL1068S0018	C2H2	25.037	30.563	23.39	16.65	11.79	2.987
CIL1308S0034	C2H2	0.18	0.17	0.537	3.647	5.043	2.923
CIL0118S0005	C2H2	14.22	11.657	10.537	9.377	8.14	2.743
CIL1546S0001	C2H2	0.893	1.1	5.577	3.14	1.437	2.68
CIL1271S0023	C2H2	7.387	15.797	6.14	4.41	3.803	2.55
CIL1353S0016	C2H2	15.57	12.293	11.22	10.21	9.323	1.26
CIL1175S0013	C2H2	11.783	8.25	6.793	3.46	3.48	1.087
CIL1473S0012	C2H2	18.147	8.73	4.903	4.53	2.25	0.99
CIL1207S0019	C2H2	9.15	14.067	8.55	4.43	2.77	0.927
CIL1577S0041	C2H2	9.137	8.37	4.037	1.307	0.5	0.637
CIL1425S0018	C2H2	13.977	26.61	44.7	6.02	0.74	0.537
CIL0364S0007	C2H2	7.583	6.227	1.987	1.99	1.077	0.457
CIL0134S0009	C3H	53.143	64.763	137.587	127.503	96.08	157.747
CIL1021S0083	C3H	114.447	109.18	237.183	242.06	151.153	146.193
CIL0953S0036	C3H	54.81	49.103	86.353	113.117	115.563	121.023
CIL1149S0052	C3H	13.857	16.75	26.893	35.65	48.567	84.157
CIL0225S0017	C3H	9.413	10.727	15.403	17.117	22.653	37.2
CIL1393S0071	C3H	12.077	14.2	20.817	21.71	25.953	32.583
CIL0155S0017	C3H	10.333	11.647	19.53	19.107	18.66	24.077
CIL1038S0043	C3H	61.637	74.233	73.9	65.01	50.993	21.477
CIL0992S0022	C3H	8.847	10.463	18.77	14.473	16.027	21.187
CIL0070S0012	C3H	51.123	48.63	35.443	30.683	28.69	19.933
CIL0998S0115	C3H	46.357	38.297	30.357	26.893	30.187	15.233
CIL1198S0038	C3H	36.143	43.98	38.483	31.57	26.117	13.093
CIL1483S0031	C3H	66.033	71.457	46.903	39.647	26.79	12.453
CIL0993S0015	C3H	23.23	24.77	24.117	21.227	17.18	9.247
CIL1165S0049	C3H	19.3	19.987	17.37	13.533	12.363	8.44
CIL0021S0023	C3H	7.92	11.4	17.527	13.337	11.157	6.023
CIL0938S0061	C3H	17.08	17.977	16	15.72	12.947	5.963
CIL1002S0028	C3H	12.187	12.413	12.847	11.673	10.253	5.777
CIL0074S0001	C3H	2.85	6.697	10.877	5.523	4.187	4.933
CIL1219S0051	C3H	9.133	10.077	9.073	6.93	5.243	2.937
CIL0972S0028	C3H	8.35	9.163	5.647	4.637	3.727	1.797
CIL1086S0068	C3H	5.04	5.46	5.263	5.22	4.233	1.247
CIL1154S0067	C3H	15.733	5.36	4.98	2.07	1.517	0.363
CIL1082S0024	CAMTA	14.023	16.997	34.873	39.3	44.627	49.133
CIL0914S0021	CAMTA	19.297	23.247	36.517	40.26	30.077	32.43
CIL0908S0180	CAMTA	23.2	23.743	20.133	14.32	12.503	9.69
CIL1500S0048	CAMTA	4.69	6.093	6.337	4.043	3.897	1.993
CIL1224S0030	CPP	1.513	2.357	4.727	4.473	3.413	5.507
CIL1246S0140	CPP	4.847	4.39	8.09	6.613	6.067	1.63
CIL0436S0008	CPP	2.12	8.343	2.38	1.26	0.813	0.377
CIL1060S0049	CSD	34.82	26.197	19.237	13.353	14.667	22.883
CIL1335S0040	DBB	175.54	192.017	139.547	132.52	127.98	87.357
CIL0921S0108	DBB	144.873	129.973	93.383	64.73	50.463	11.413
CIL0978S0067	DBB	7.887	2.34	2.937	3.61	1.867	1.623
CIL1020S0111	DBB	7.36	5.363	4.153	2.917	3.18	0.713
CIL0908S0172	DBP	9.987	11.733	19.5	27.157	35.19	114.96
CIL1500S0029	DBP	6.077	4.947	7.767	12.437	19.26	39.693
CIL1332S0039	DBP	16.22	21.07	20.82	23.667	24.663	33.077
CIL0302S0011	DDT	30.32	24.277	31.62	38.707	47.797	72.153
CIL1106S0004	EIL	108.263	143.787	316.91	308.993	282.657	283.013
CIL1187S0084	EIL	56.853	76.19	234.9	159.347	84.02	109.117
CIL1465S0012	EIL	11.753	13.57	20.133	22.693	28.793	48.513
CIL0957S0089	FAR1	7.04	7.863	8.473	8.42	11.03	14.327
CIL0394S0012	FAR1	19.81	18.92	15.693	14.697	14.48	8.79
CIL0957S0084	FAR1	11.19	9.593	9.823	8.363	8.183	4.17
CIL1126S0024	FAR1	7.07	6.57	8.627	8.037	6.847	3.42
CIL1138S0078	GARP-ARR-B	3.83	4.207	5.4	7.807	9.997	11.53
CIL1164S0011	GARP-ARR-B	13.11	14.033	17.54	13.89	10.603	5.77
CIL1575S0022	GARP-ARR-B	6.63	5.473	14.433	11.027	13.95	3.64
CIL1006S0039	GARP-G2-like	1.267	1.327	3.88	5.11	13.53	78.867
CIL0059S0007	GARP-G2-like	18.537	17.817	29.44	32.3	35.537	46.887
CIL1215S0032	GARP-G2-like	14.393	13.41	19.617	25.153	30.143	40.42
CIL1102S0085	GARP-G2-like	7.983	8.177	12.47	12	14.02	23.63
CIL0993S0078	GARP-G2-like	102.523	128.95	55.953	44.953	39.887	15.767
CIL0246S0017	GARP-G2-like	31.917	23.547	23.997	17.147	20.137	14.783
CIL0902S0131	GARP-G2-like	0.23	0.767	7.593	3.817	4.407	13.233
CIL1293S0041	GARP-G2-like	32.963	39.81	23.027	18.947	13.623	9.067
CIL1380S0036	GARP-G2-like	21.04	14.66	13.4	13.383	12.51	7.757
CIL1143S0069	GARP-G2-like	34.06	29.14	20.407	18.48	16.957	7.447
CIL0089S0005	GARP-G2-like	41.463	27.413	23.717	16.683	13.387	5.707
CIL1270S0004	GARP-G2-like	27.527	16.537	13.887	12.527	11.233	3.94
CIL0893S0229	GARP-G2-like	11.693	7.013	5.62	5.58	4.69	2.877
CIL1203S0002	GARP-G2-like	10.383	11.433	7.473	6.533	5.913	2.627
CIL1236S0004	GARP-G2-like	25.167	18.193	14.647	10.127	11.28	2.623
CIL0987S0049	GARP-G2-like	14.017	7.463	5.983	9.437	5.913	2.567
CIL1157S0032	GARP-G2-like	5.98	5.133	6.287	5.183	3.723	1.957
CIL1399S0027	GARP-G2-like	13.973	13.96	10.193	6.733	4.24	1.913
CIL1340S0013	GARP-G2-like	11.607	9.163	7.1	4.21	3.457	1.693
CIL0897S0156	GARP-G2-like	9.67	7.57	6.067	6.547	4.113	1.65
CIL0002S0040	GARP-G2-like	4.6	5.997	7.567	5.06	3.383	1.18
CIL1492S0002	GARP-G2-like	7.383	7.623	6.777	4.98	4.197	0.933
CIL1047S0094	GARP-G2-like	6.163	2.923	4.177	4.71	4.7	0.89
CIL1592S0012	GARP-G2-like	5.39	7.003	3.543	1.7	1.337	0.593
CIL0909S0031	GeBP	11.667	13.957	24.643	24.487	34.287	55.87
CIL1520S0046	GeBP	11.817	16.19	29.007	33.883	38.117	41.85
CIL1386S0022	GRAS	38.73	55.517	89.953	93.653	117.14	139.9
CIL1555S0054	GRAS	31.51	27.933	70.01	80.88	88.37	91.457
CIL0355S0005	GRAS	4.89	8.733	31.257	26.013	38.467	71.633
CIL1577S0044	GRAS	10.18	11.96	44.853	33.413	39.667	67.197
CIL0355S0006	GRAS	0.583	2.887	7.763	10.707	18.48	59.337
CIL1239S0050	GRAS	18.417	21.567	24.723	26.51	30.123	44.627
CIL1102S0101	GRAS	38.223	37.99	91.56	82.427	73.903	39.843
CIL1525S0028	GRAS	9.097	11.267	14.123	14.523	15.63	26.47
CIL1459S0003	GRAS	4.573	5.083	6.92	10.54	11.643	15.613
CIL0086S0008	GRAS	26.14	21.163	23.027	19.59	19.887	11.51
CIL1353S0006	GRAS	49.25	43.02	44.973	35.363	22.887	11.37
CIL1175S0023	GRAS	62.583	58.547	39.787	36.497	32.543	10.35
CIL0906S0049	GRAS	25.073	29.567	19.047	16.23	11.933	9.5
CIL1359S0025	GRAS	20.743	17.413	18.373	15.523	11.48	8.377
CIL1483S0028	GRAS	42.1	40.763	37.18	25.007	22.5	7.38
CIL0923S0142	GRAS	0.403	6.183	0.263	0.287	0.47	5.19
CIL1254S0036	GRAS	19.377	23.633	16.663	12.72	12.397	4.67
CIL0919S0128	GRAS	0.857	1.893	6.757	9.043	6.227	4.587
CIL1324S0067	GRAS	20.647	32.207	17.843	10.257	7.04	4.137
CIL0972S0101	GRAS	19.593	18.087	21.323	17.73	12.88	3.393
CIL1239S0048	GRAS	12.247	10.933	10.913	9.223	9.22	3.23
CIL1193S0051	GRAS	27.96	23.58	19.357	12.663	8.91	2.787
CIL1050S0068	GRAS	26.047	27.54	19.74	10.15	6.643	1.45
CIL1092S0088	GRAS	10.713	15.127	8.687	5.41	4.187	1.247
CIL1384S0016	GRAS	8.55	6.427	6.977	5.177	3.967	1.247
CIL1245S0031	GRAS	3.383	9.43	2.54	3.087	2.09	0.763
CIL1028S0015	GRAS	11.84	13.153	6.953	4.08	2.873	0.373
CIL1323S0044	GRF	2.59	4.117	2.887	7.103	8.817	21.48
CIL1180S0026	GRF	3.273	5.357	1.587	0.57	0.463	0.623
CIL1266S0008	HB-BELL	209.89	160.61	111.533	85.133	77.777	30.537
CIL1464S0027	HB-BELL	64.967	63.6	38.203	31.73	23.027	12.16
CIL0917S0049	HB-BELL	42.457	30.9	37.147	34.38	28.62	12.1
CIL1093S0138	HB-BELL	4.977	7.637	10.71	8.543	6.713	7.13
CIL1409S0019	HB-BELL	37.68	38.513	37.317	27.157	21.77	6.887
CIL1497S0008	HB-BELL	19.317	16.257	19.053	20.91	20.723	5.467
CIL0895S0163	HB-BELL	5.213	6.257	6.227	4.81	4.713	1.41
CIL1180S0031	HB-HD-ZIP	11.097	13.087	141.923	236.017	157.443	269.91
CIL1137S0056	HB-HD-ZIP	73.927	77.677	122.467	173.903	151.78	152.953
CIL0211S0005	HB-HD-ZIP	494.81	734.847	535.677	331.067	175.013	70.247
CIL0121S0004	HB-HD-ZIP	25.323	36.84	33.87	46.68	48.243	62.217
CIL1189S0060	HB-HD-ZIP	90.27	126.277	191.51	162.577	113.213	37.727
CIL1047S0078	HB-HD-ZIP	0.87	2.907	3.237	4.453	10.4	20.727
CIL1184S0023	HB-HD-ZIP	42.883	48.343	32.793	27.493	27.587	20.38
CIL1162S0004	HB-HD-ZIP	4.76	7.957	38.257	29.197	21.597	16.777
CIL1436S0056	HB-HD-ZIP	1.697	2.713	6.893	6.67	9.533	12.703
CIL1165S0038	HB-HD-ZIP	13.67	18.09	11.33	8.29	5.403	7.543
CIL0937S0123	HB-HD-ZIP	52.937	56.763	40.1	29.41	22.34	7.333
CIL1166S0052	HB-HD-ZIP	15.047	14.157	15.777	13.377	9.357	7.22
CIL1277S0052	HB-HD-ZIP	1.587	2.273	5.607	11.3	10.563	6.743
CIL1539S0036	HB-HD-ZIP	0.843	1.013	0.833	3.977	3.413	6.087
CIL0987S0124	HB-HD-ZIP	3.327	6.047	8.893	7.733	6.933	5.267
CIL1443S0034	HB-HD-ZIP	33.023	27.45	23.477	18.883	15.513	4.873
CIL0218S0006	HB-HD-ZIP	0.28	0.627	20.83	16.743	3.79	3.96
CIL1043S0041	HB-HD-ZIP	1.88	3.317	5.47	3.73	4.21	3.923
CIL1268S0050	HB-HD-ZIP	7.72	8.977	8.497	6.053	5.113	2.807
CIL1172S0033	HB-HD-ZIP	11.113	11.257	7.033	4.6	2.023	1.573
CIL0987S0026	HB-HD-ZIP	1.437	3.66	8.227	4.873	1.193	0.98
CIL1219S0024	HB-HD-ZIP	5.37	9.34	5.467	2.703	1.57	0.823
CIL1277S0024	HB-HD-ZIP	16.227	20.667	10.083	3.497	2.307	0.51
CIL0176S0066	HB-HD-ZIP	5.753	6.65	3.26	1.877	1.873	0.493
CIL1199S0011	HB-HD-ZIP	5.593	5.16	3.827	2.19	1.363	0.493
CIL1492S0004	HB-HD-ZIP	2.357	5.003	2.653	1.243	0.74	0.477
CIL1120S0033	HB-HD-ZIP	3.27	9.243	1.897	0.973	0.677	0.283
CIL1071S0015	HB-KNOX	78.353	68.84	56.217	55.943	43.877	15.053
CIL0923S0125	HB-KNOX	29.72	29.423	22.833	22.12	22.487	14.227
CIL0202S0005	HB-other	16.803	24.377	43.623	45.497	39.76	50.82
CIL1034S0057	HB-other	11.193	11.157	9.25	9.143	8.827	3.397
CIL1023S0052	HB-other	0.033	0.477	21.797	14.6	0.327	0.943
CIL1094S0050	HB-WOX	3.94	5.507	8.037	9.027	10.61	6.807
CIL1363S0030	HB-WOX	7.457	6.04	7.36	4.527	3.243	1.497
CIL0120S0015	HSF	0.8	2.863	9.753	51.79	88.4	95.25
CIL1037S0050	HSF	14.053	19.993	65.45	121.09	147.17	90.49
CIL0945S0020	HSF	11.3	11.687	34.04	32.267	42.31	64.773
CIL1153S0033	HSF	1.383	2.82	7.797	15.553	29.777	59.423
CIL1197S0065	HSF	3.507	5.18	7.25	7.863	13.347	30.763
CIL0893S0416	HSF	0.803	1.647	4.69	14.32	17.28	25.363
CIL0962S0001	HSF	11.933	13.833	22.967	23.77	27.827	24.287
CIL1340S0039	HSF	11.18	14.68	21.73	21.977	23.183	23.807
CIL1376S0001	HSF	0.267	0.387	2.8	13.777	25.023	22.927
CIL1539S0013	HSF	4.477	5.153	10.207	9.307	12.327	19.98
CIL1387S0013	HSF	0.717	3.253	5.227	8.39	18.527	18.043
CIL0893S0048	HSF	1.533	1.177	5.76	5.077	8.913	12.277
CIL1506S0015	HSF	8.807	7.177	22.547	15.257	11.9	4.033
CIL1385S0006	HSF	4.457	5.317	4.207	3.78	3.05	1.073
CIL0114S0026	LIM	4.94	6.76	14.633	23.297	22.917	28.177
CIL1020S0024	LIM	32.15	30.467	21.923	16.42	16.41	12.823
CIL0906S0164	LIM	30.167	26.67	22.49	22.99	21.75	10.407
CIL1012S0072	LIM	58.553	58.693	31.31	15.35	12.067	1.923
CIL1456S0069	LIM	12.587	10.13	5.31	2.293	1.567	0.903
CIL1064S0054	LIM	8.67	16.827	5.01	2.147	1.107	0.46
CIL1222S0067	LOB	1.287	2.107	11.343	83.833	96.077	41.193
CIL1201S0012	LOB	52.02	80.9	51.96	39.297	10.817	17.467
CIL1005S0001	LOB	0.053	0.08	0.047	4.35	6.323	11.523
CIL1490S0023	LOB	0.053	0.08	0.047	4.35	6.323	11.523
CIL0312S0015	LOB	0.143	0.053	0.34	0.697	1.67	10.063
CIL0263S0001	LOB	0.087	0.37	5.253	3.757	4.72	4.167
CIL1196S0093	LOB	0	0.207	4.093	12.067	6.13	1.937
CIL0929S0113	MADS-MIKC	48.38	31.247	46.347	50.117	34.83	24.037
CIL1107S0047	MADS-MIKC	52.29	55.46	52.853	46.12	42.53	23.213
CIL1259S0021	MADS-MIKC	27.487	24.52	19.923	16.25	16.05	10.547
CIL1171S0058	MADS-MIKC	4.947	7.217	11.543	12.78	12.17	10.543
CIL1173S0034	MADS-MIKC	16.143	15.96	17.473	16.913	13.25	6.853
CIL0909S0218	MADS-MIKC	4.47	6.383	3.823	3.077	2.453	0.69
CIL1145S0051	MADS-MIKC	2.12	3.537	12.903	2.583	2.253	0.45
CIL1486S0010	MADS-M-type	29.957	28.28	19.41	18.757	23.23	12.81
CIL1107S0014	MYB	61.92	44.16	111.343	132.72	112.033	168.127
CIL1463S0018	MYB	0.62	0.343	17.197	15.36	17.11	97.937
CIL0895S0085	MYB	18.867	14.227	17.86	40.713	52.913	86.833
CIL1187S0023	MYB	1.083	1.317	11.007	28.177	42.28	82.457
CIL1551S0016	MYB	1.073	1.547	16.09	54.397	74.47	79.273
CIL0996S0059	MYB	0.273	0.55	7.657	39.527	55.55	67.45
CIL1051S0068	MYB	0.503	1.283	8.893	19.563	29.433	60.587
CIL1579S0009	MYB	0.893	2.403	41.043	49.093	69.277	57.697
CIL0893S0173	MYB	6.203	4.46	25.447	17.937	11.58	52.76
CIL1021S0064	MYB	0.663	0.52	37.453	38.577	25.96	51.943
CIL1607S0026	MYB	18.333	23.043	31.763	37.12	38.023	44.223
CIL1037S0103	MYB	25.5	24.767	59.393	55.863	47.2	43.343
CIL1164S0030	MYB	12.313	14.937	18.727	22.263	25.447	38.537
CIL1023S0011	MYB	14.03	8.503	25.853	31.853	29.173	35.47
CIL1130S0072	MYB	0.667	0.89	5.7	19.38	24.077	34.487
CIL1154S0040	MYB	74.487	66.473	45.463	38.723	36.883	31.143
CIL1318S0010	MYB	8.897	13.737	13.7	38.307	27.263	29.433
CIL1003S0135	MYB	2.253	3.873	9.253	15.843	19.803	23.713
CIL0437S0010	MYB	47.327	57.373	40.517	38.22	23.22	20.59
CIL1439S0013	MYB	2.857	5.143	3.49	5.23	8.137	19.607
CIL1207S0053	MYB	9.953	5.437	29.037	18.817	10.21	17.573
CIL1539S0033	MYB	1.53	1.473	14.703	16.49	13.017	16.093
CIL0962S0021	MYB	0.37	0.433	5.137	8.18	9.433	15.983
CIL1020S0016	MYB	6.64	8.697	9.767	13.393	13.513	14.08
CIL0946S0107	MYB	0.043	0.283	1.47	1.363	2.553	13.91
CIL0906S0032	MYB	10.87	5.193	22.517	26.85	23.98	13.39
CIL1100S0041	MYB	7.437	11.19	13.403	19.35	14.08	12.387
CIL1371S0069	MYB	0.257	0.073	1.157	3.43	4.137	8.447
CIL1254S0002	MYB	1.087	0.99	14.067	14.937	6.453	6.873
CIL1053S0020	MYB	0.227	0.88	3.57	13.163	15.297	6.183
CIL0176S0054	MYB	0.277	1.03	3.423	3.457	2.19	5.8
CIL1003S0045	MYB	24.907	24.227	10.67	8.527	7.237	5.317
CIL1212S0041	MYB	61.16	55.403	33.753	26.29	21.4	5.1
CIL1535S0029	MYB	9.193	5.567	3.96	5.517	4.38	4.657
CIL0021S0006	MYB	10.423	9.193	5.75	5.867	5.79	4.65
CIL0942S0123	MYB	0.357	0.473	2.167	5.087	4.897	4.573
CIL0302S0018	MYB	2.91	2.49	2.913	6.867	7.81	3.647
CIL1245S0041	MYB	1.583	1.833	9.043	16.97	17.547	3.62
CIL1093S0100	MYB	20.77	15.903	11.16	11.86	7.867	3.27
CIL1447S0047	MYB	13.63	8.527	9.23	9.067	9.27	3.103
CIL1127S0080	MYB	1.62	11.383	5.897	28.403	15.523	2.88
CIL1064S0058	MYB	5.613	4.537	3.44	3.513	3.713	2.443
CIL1531S0032	MYB	7.927	4.99	2.64	3.143	5.077	2.4
CIL0922S0215	MYB	9.977	20.617	6.727	6.817	4.27	2.313
CIL0935S0051	MYB	19.653	11.803	6.507	4.227	3.757	2.147
CIL1405S0083	MYB	0	0.07	5.56	1.947	3.133	2.057
CIL0188S0008	MYB	16.177	19.077	20.597	11.99	6.523	1.46
CIL1294S0079	MYB	15.353	12.087	9.973	5.28	2.6	1.353
CIL0217S0001	MYB	4.867	5.67	3.863	5.7	2.93	1.257
CIL1006S0011	MYB	5.967	8.503	7.043	3.573	1.747	0.973
CIL0925S0130	MYB	3.73	2.707	7.333	2.923	2.06	0.9
CIL1273S0036	MYB	3.713	7.827	4.043	2.427	0.74	0.783
CIL1512S0020	MYB	11.983	4.36	2.183	1.78	1.663	0.267
CIL0363S0008	MYB	10.837	12.68	4.66	1.503	0.27	0.24
CIL0252S0005	MYB	6.627	1.123	1.95	1.67	0.907	0.217
CIL0923S0078	MYB	17.6	2.9	3.427	2.737	2.843	0.193
CIL1358S0013	MYB	7.073	5.577	2.347	1.33	0.54	0.187
CIL1528S0032	MYB	11.9	1.7	2.283	2.32	2.237	0.13
CIL1274S0040	MYB	5.523	3.413	2.61	1.383	1.85	0.097
CIL1391S0005	MYB	5.807	2.72	1.66	0.563	0.713	0.073
CIL1266S0023	MYB	6.063	0.897	1.54	1.07	1.31	0.037
CIL1605S0010	MYB	0.15	37.25	0.17	0.02	0.033	0
CIL1268S0041	MYB-related	38.01	41.367	105.767	113.963	122.613	150.27
CIL1375S0032	MYB-related	39.757	39.66	52.987	99.017	110.677	79.737
CIL0902S0188	MYB-related	26.25	25.74	36.873	40.52	43.767	65.26
CIL1118S0015	MYB-related	190.137	173.903	116.707	120.293	99.803	49.11
CIL0344S0009	MYB-related	10.36	9.347	19.837	25.403	24.753	47.65
CIL1066S0068	MYB-related	12.773	15.667	19.76	20.907	22.813	36.973
CIL1245S0064	MYB-related	21.807	34.443	47.813	53.73	39.997	34.857
CIL0176S0007	MYB-related	2.26	5.15	25.833	17.443	19.12	25.407
CIL0982S0042	MYB-related	6.287	8.083	13.45	15.843	17.543	24.277
CIL1221S0017	MYB-related	13.697	14.32	25.007	28.067	26.09	18.243
CIL1030S0084	MYB-related	77.407	70.567	75.337	76.953	44.56	16.877
CIL0059S0009	MYB-related	33.013	35.6	40.073	27.5	27.103	16.487
CIL1006S0118	MYB-related	47.767	54.87	35.5	31.127	25.5	12.903
CIL1427S0035	MYB-related	0.283	1.41	1.853	14.997	9.657	7.88
CIL0064S0037	MYB-related	21.897	18.697	15.907	14.047	13.93	6.433
CIL1393S0075	MYB-related	36.133	32.16	31.907	26.11	19.577	6.117
CIL1099S0017	MYB-related	105.47	144.367	76.597	31.153	16.413	5.203
CIL0073S0022	MYB-related	3.437	4.41	7.01	4.65	4.093	3.76
CIL1226S0045	MYB-related	7.907	9.87	11.117	8.3	6.79	3.313
CIL1131S0026	MYB-related	12.3	11.077	10.607	8.973	9.397	3.033
CIL1599S0013	MYB-related	0.627	0.363	7.317	7.287	1.67	2.323
CIL0125S0007	MYB-related	1174.19	355.25	168.7	113.41	40.77	1.843
CIL0458S0002	MYB-related	6.293	8.663	4.83	10.797	6.907	1.77
CIL0325S0005	MYB-related	255.15	96.327	62.317	53.043	62.28	1.073
CIL0929S0002	MYB-related	43.013	8.703	5.447	6.06	6.633	0.88
CIL1403S0013	MYB-related	5.073	8.44	4.627	1.867	0.867	0.7
CIL1131S0019	MYB-related	3.897	3.253	7.097	12.84	3.683	0.643
CIL1032S0052	MYB-related	0.107	0.05	5.387	2.793	2.853	0.183
CIL1190S0050	MYB-related	38.383	11.447	6.467	3.593	8.953	0.127
CIL1148S0033	MYB-related	15.75	11.563	2.753	1.253	1.313	0.09
CIL1380S0010	MYB-related	41.283	11.157	0.41	0.237	0.227	0.07
CIL1286S0021	MYB-related	5.877	3.83	0.437	0.193	1.47	0
CIL1444S0032	NAC	6.397	12.937	279.997	370.783	498.437	1474.36
CIL1078S0094	NAC	6.1	7.637	106.46	239.17	316.26	980.26
CIL0644S0015	NAC	16.56	31.773	89.603	190.58	297.547	806.26
CIL0984S0083	NAC	69.057	82.31	205.937	173.183	195.137	229.633
CIL1236S0021	NAC	16.007	22.043	127.307	134.657	137.493	199.23
CIL0374S0002	NAC	70.217	103.34	159.01	158.723	178.153	131.927
CIL1147S0075	NAC	6.247	11.02	33.003	41.1	44.44	105.903
CIL1316S0029	NAC	51.523	58.367	155.97	171.333	168.347	100.59
CIL1258S0024	NAC	10.663	13.703	175.667	143.773	108.247	99.683
CIL1372S0034	NAC	8.023	6.81	37.927	43.347	56.933	91.773
CIL0967S0033	NAC	28.327	30.557	68.347	72.167	85.187	80.78
CIL1248S0021	NAC	0.177	1.433	4.697	10.05	26.03	51.943
CIL1086S0047	NAC	7.177	4.623	11.637	11.92	13.467	37.353
CIL1565S0024	NAC	0.85	3.1	12.627	27.203	11.527	32.01
CIL1342S0029	NAC	10.34	11.703	21.537	22.44	28.4	30.857
CIL1110S0016	NAC	11.22	13.303	15.737	46.207	34.24	29.76
CIL0987S0080	NAC	18.187	19.067	43.263	38.36	39.657	23.837
CIL1075S0033	NAC	11.093	11.94	26.843	21.93	22.78	19.783
CIL0897S0137	NAC	0.117	0.517	4.407	11.83	23.463	18.98
CIL1403S0014	NAC	2.773	2.663	9.553	6.243	8.147	17.71
CIL1102S0014	NAC	1.823	4.687	14.283	28.013	28.64	15.05
CIL0989S0011	NAC	6.227	5.007	5.59	8.397	11.657	13.75
CIL1578S0020	NAC	4.277	3.687	18.707	19.43	15.157	13.347
CIL0513S0010	NAC	7.383	5.09	3.143	6.127	9.66	12.813
CIL0156S0015	NAC	14.523	12.727	133.653	94.433	71.06	12.807
CIL0893S0115	NAC	2.75	1.85	20.6	11.767	5.433	12.56
CIL1409S0004	NAC	39.77	42.407	44.53	33.783	30.66	11.8
CIL1425S0009	NAC	1.947	4.73	3.663	10.443	11.083	11.767
CIL0902S0076	NAC	22.18	33.153	27.76	18.323	14.343	9.637
CIL1444S0031	NAC	0.25	0.67	0.49	4.297	5.517	9.163
CIL0942S0222	NAC	0.693	0.52	2.59	3.927	2.567	7.113
CIL1155S0054	NAC	13.533	13.527	10.553	10.49	10.53	6.017
CIL0131S0001	NAC	2.497	1.28	3.917	4.64	3.97	5.957
CIL0745S0001	NAC	0.78	1.833	4.14	3.737	3.943	5.61
CIL0205S0012	NAC	12.333	18.233	12.16	10.303	9.417	5.507
CIL1032S0006	NAC	10.687	14.047	15.03	12.573	10.867	4.937
CIL1446S0008	NAC	29.48	20.713	63.163	42.037	27.917	4.223
CIL1470S0022	NAC	15.54	8.687	16.237	12.137	4.82	3.013
CIL0899S0085	NAC	7.363	6.58	7.98	6.01	5.433	2.233
CIL0899S0014	NAC	1.21	0.18	2.55	5.603	2.63	2.23
CIL0935S0114	NAC	4.193	4.383	4.587	4.923	6.443	1.673
CIL0893S0366	NAC	12.1	4.913	10.637	5.367	4.093	1.137
CIL0002S0017	NAC	5.263	1.847	7.39	3.15	2.037	0.25
CIL1158S0018	NAC	10.38	2.577	4.68	2.253	1.877	0.21
CIL0902S0104	NAC	29.623	7.517	6.987	3.47	4.703	0.203
CIL1390S0043	NF-X1	11.89	12.837	14.287	16.383	20.303	41.857
CIL1047S0137	NF-YA	0.32	0.403	4.747	5.947	2.893	3.243
CIL1131S0031	NF-YA	5.417	3.733	2.07	2.57	2.507	1.407
CIL1155S0026	NF-YB	22.01	27.807	21.387	16.453	12.92	8.597
CIL1196S0101	NF-YB	3.84	4.023	5.26	6.393	6.43	8.083
CIL0307S0010	NF-YB	1.803	2.16	2.423	3.013	3.63	5.947
CIL1057S0102	NF-YB	27.713	29.233	28.46	22.757	17.24	5.57
CIL1595S0032	NF-YB	4.993	6.6	5.293	4.443	2.573	1.09
CIL0979S0025	NF-YC	20.317	36.797	59.893	60.567	58.74	109.51
CIL1505S0050	NF-YC	25.603	32.04	47.4	43.613	46.29	54.1
CIL1061S0047	NF-YC	41.437	59.64	83.613	73.567	75.27	53.633
CIL1528S0008	NF-YC	110.15	135.57	130.503	84.067	81.3	50.427
CIL0937S0067	NF-YC	17.97	23.847	28.79	32.073	31.91	42.193
CIL1055S0029	NF-YC	4.843	5.373	6.35	7.963	9.053	11.953
CIL0908S0082	OFP	6.383	6.833	4.74	2.41	1.327	1.097
CIL0895S0054	PLATZ	100.653	103.393	98.773	161.293	225.297	279.293
CIL1101S0105	PLATZ	36.217	40.347	65.363	139.48	157.17	187.64
CIL1550S0021	PLATZ	47.283	51.373	129.977	139.54	144.017	92.637
CIL1294S0036	PLATZ	3.82	6.357	7.343	11.853	13.133	10.44
CIL0893S0020	PLATZ	5.137	3.537	3.74	2.49	1.323	0.613
CIL1171S0041	RWP-RK	6.847	7.987	10.237	14.18	16.9	24.34
CIL0912S0068	RWP-RK	6.163	8.147	9.7	12.34	14.067	19.87
CIL1094S0058	RWP-RK	2.693	5.017	4.407	2.957	1.17	0.43
CIL1363S0018	S1Fa-like	6.27	6.287	4.917	2.167	2.117	0.993
CIL1230S0089	SBP	37.24	36.543	52.737	66.02	71.9	128.787
CIL1369S0030	SBP	45.58	32.857	37.357	43.763	32.517	12.557
CIL1138S0014	SBP	28.377	34.03	39.93	34.647	25.44	12.183
CIL1198S0043	SBP	11.24	10.923	13.12	12.083	9.793	5.233
CIL0893S0386	SBP	38.227	32.297	23.207	18.977	13.44	4.84
CIL1086S0008	SBP	3.287	5.383	11.617	8.85	6.027	4.747
CIL1479S0028	SBP	10.76	14.343	33.94	12.813	9.003	3.3
CIL1515S0030	SBP	2.467	3.177	6.72	9.027	2.277	2.953
CIL1086S0071	SBP	13.26	15.443	14.577	11.277	7.457	2.59
CIL1361S0046	SBP	11.327	9.937	8.277	5.163	4.423	1.427
CIL1047S0099	SBP	11.473	10.823	6.807	3.083	1.81	0.973
CIL1064S0113	SBP	4.287	5.707	5.067	3.863	2.263	0.537
CIL1118S0019	SBP	3.39	7.75	3.543	1.39	0.763	0.077
CIL0929S0108	TCP	3.73	6.637	7.777	12.773	17.74	28.923
CIL0284S0009	TCP	58.15	54.373	45.51	38.623	31.273	15.683
CIL1025S0062	TCP	37.303	62.67	48.42	35.693	27.513	10.973
CIL1145S0042	TCP	27.553	29.387	19.847	15.77	15.717	8.873
CIL1128S0041	TCP	29.837	29.093	32.907	20.727	14.07	5.933
CIL1503S0023	TCP	6.903	9.98	4.27	3.43	3.93	5.553
CIL0921S0011	TCP	31.717	36.947	23.783	19.977	17.283	4.773
CIL1134S0007	TCP	28.353	28.893	19.713	16.223	11.223	4.417
CIL1164S0036	TCP	8.99	11.863	10.377	8.87	6.197	3.23
CIL1025S0094	TCP	1.477	3.337	6.723	5.09	2.953	2.98
CIL1076S0088	TCP	34.34	41.327	20.84	11.68	7.29	2.94
CIL0407S0008	TCP	12.657	15.807	9.46	7.22	6.057	2.593
CIL1607S0032	TCP	4.53	7.207	11.733	7.567	4.067	2.293
CIL1032S0042	TCP	4.267	5.083	4.16	4.147	2.807	1.487
CIL1135S0010	TCP	8.507	11.547	5.78	3.477	1.593	1.313
CIL1277S0014	TCP	10.937	15.633	7.273	3.38	2.393	0.867
CIL1212S0035	TCP	6.683	7.217	6.6	2.923	1.96	0.603
CIL0369S0007	TCP	6.797	16.72	2.863	1.107	0.6	0.383
CIL0940S0046	TCP	4.94	5.337	1.573	1.06	0.853	0.263
CIL1093S0124	TCP	2.623	5.497	0.89	1.457	0.433	0.023
CIL1547S0020	Tify	32.873	35.84	79.11	141.593	136.06	273.07
CIL1216S0098	Tify	6.727	8.367	41.063	75.87	122.34	255.097
CIL1295S0055	Tify	18.257	11.257	72.03	49.047	74.743	152.113
CIL0979S0120	Tify	1.567	3.297	21.7	17.533	16.553	116.317
CIL1582S0033	Tify	26.26	18.207	66.663	59.157	53.05	94.387
CIL1338S0009	Tify	115.107	147.387	135.593	77.937	48.98	33.6
CIL1390S0024	Tify	41	28.987	18.68	24.47	16.68	6.307
CIL1565S0018	Tify	65.947	57.833	38.8	29.433	20.26	6.177
CIL1280S0018	Tify	0.913	0.193	3.037	4.383	1.87	5.647
CIL1246S0012	Tify	9.423	15.517	17.707	11.667	3.717	2.83
CIL1018S0042	Trihelix	0.767	0.56	3.677	12.633	24.923	72.153
CIL0893S0299	Trihelix	6.45	6.283	11.51	16.163	19.237	52.18
CIL1155S0058	Trihelix	13.667	12.363	20.557	26.21	29.29	42.057
CIL1280S0007	Trihelix	12.16	13.707	24.44	24.56	25.43	22.93
CIL0465S0003	Trihelix	8.977	11.443	14.017	14.163	13.867	20.743
CIL0902S0056	Trihelix	55.473	54.22	31.933	25.48	20.713	19.083
CIL1169S0030	Trihelix	33.703	36.633	26.803	20.223	17.727	15.443
CIL0385S0011	Trihelix	22.31	25.44	19.65	17.84	15.847	10.843
CIL1295S0010	Trihelix	33.133	34.653	22.307	16.99	13.82	10.227
CIL1009S0066	Trihelix	25.75	31.38	22.54	13.053	10.337	8.573
CIL1227S0021	Trihelix	2.853	3.283	3.82	5.323	3.793	7.33
CIL1169S0029	Trihelix	22.293	18.06	7.25	6.09	5.89	6.937
CIL1216S0078	Trihelix	16.247	8.787	10.607	10.907	11.09	6.677
CIL1064S0076	Trihelix	23.443	23.433	21	22.09	19.327	6.51
CIL0937S0166	Trihelix	14.657	14.88	13.687	11.51	10.357	6.043
CIL1009S0067	Trihelix	33.61	30.123	17.837	12.217	7.33	3.007
CIL1128S0017	Trihelix	7.36	7.303	9.813	7.733	5.787	2.637
CIL0937S0041	Trihelix	31.633	26.087	17.88	12.59	9.647	2.56
CIL0919S0082	Trihelix	5.463	5.12	3.537	1.75	1.15	0.323
CIL1133S0058	Trihelix	3.853	16.507	1.487	0.737	0.26	0.13
CIL0045S0004	TUB	32.87	33.903	72.607	69.637	70.32	55.01
CIL0929S0008	TUB	17.687	25.943	36.003	16.79	14.043	14.6
CIL1009S0068	TUB	23.967	28.233	26.493	21.743	17.91	11.153
CIL1025S0112	TUB	21.803	21.647	21.71	17.74	12.053	8.327
CIL1464S0002	TUB	14.753	20.017	13.023	7.727	4.92	3.98
CIL0998S0069	ULT	8.717	10.823	11.147	13.28	14.963	18.893
CIL1076S0024	Whirly	19.503	27.033	22.843	19.31	17.947	5.153
CIL1383S0019	WRKY	24.093	37.15	142.103	194.12	270.897	696.597
CIL0984S0056	WRKY	0.863	1.77	20.007	87.657	127.037	296.8
CIL0922S0042	WRKY	1.477	2.51	6.333	28.507	68.14	279.06
CIL0599S0004	WRKY	28.37	33.663	167.757	175.277	193.983	268.557
CIL1114S0043	WRKY	22.177	35.933	97.843	165.313	178.993	262.86
CIL0293S0012	WRKY	55.95	55.15	75.08	83.533	86.607	182.033
CIL1515S0031	WRKY	0.347	0.693	5.497	42.543	56.213	157.113
CIL1030S0116	WRKY	4.193	6.527	39.493	52.937	77.413	133.743
CIL1132S0068	WRKY	4.95	9.273	51.11	79.963	83.997	131.837
CIL1569S0016	WRKY	4.63	11.84	15.72	16.257	46.017	129.443
CIL0267S0014	WRKY	4.143	5.063	5.897	8.247	22.25	125.36
CIL0893S0269	WRKY	18.717	27.74	42.877	70.507	85.863	119.97
CIL1152S0041	WRKY	2.747	3.82	15.857	13.79	26.533	103.647
CIL1090S0039	WRKY	10.46	12.963	120.163	89.403	101.07	79.86
CIL1557S0008	WRKY	28.017	26.69	87.427	73.443	50.22	54.347
CIL1453S0009	WRKY	3.6	4.387	32.227	59.233	59.753	54.167
CIL1068S0058	WRKY	17.44	18.513	40.283	46.59	54.2	50.527
CIL1454S0010	WRKY	21.293	24.567	29.963	29.69	32.783	46.917
CIL1037S0090	WRKY	41.88	48.527	84.527	66.957	60.607	44.783
CIL1324S0042	WRKY	33.01	53.69	229.23	162.353	201.153	44.223
CIL1244S0021	WRKY	3.797	7.217	96.787	51.55	65.627	36.91
CIL0929S0088	WRKY	20.51	17.86	97.617	87.52	42.74	36.303
CIL1031S0115	WRKY	3.193	3.173	30.04	49.74	72.537	35.677
CIL1391S0024	WRKY	5.433	5.503	31.393	70.8	69.307	31.827
CIL0982S0050	WRKY	3.2	3.533	5.62	6.54	8.843	30.44
CIL1374S0029	WRKY	2.143	1.553	14.567	33.317	28.983	30.067
CIL1030S0029	WRKY	2.887	3.44	39.943	43.62	34.453	30.047
CIL1182S0070	WRKY	9.657	11.62	16.673	27.137	24.393	28.577
CIL0266S0014	WRKY	15.45	28.507	25.553	29.847	40.567	27.747
CIL1138S0070	WRKY	32.37	43.06	159.453	74.963	84.94	25.813
CIL1201S0001	WRKY	48.237	52.663	221.727	154.503	87.277	25.757
CIL1086S0006	WRKY	4.683	7.18	6.17	13.287	27.917	25.357
CIL1277S0034	WRKY	0.17	1.677	3.15	8.47	12.017	24.07
CIL1122S0100	WRKY	3.14	3.91	8	8.917	11.73	23.967
CIL0972S0077	WRKY	2.177	5.417	5.697	6.487	11.39	19.473
CIL1246S0078	WRKY	19.727	24.01	77.947	68.157	59.997	19.013
CIL0984S0117	WRKY	9.823	11.82	28.79	36.603	33.593	18.793
CIL1344S0010	WRKY	0.23	0.4	0.96	1.92	3.877	12.643
CIL1015S0121	WRKY	0.637	1.93	25.223	19.71	24.967	11.297
CIL0914S0073	WRKY	1.517	2	13.033	15.693	15.57	11.03
CIL1101S0008	WRKY	0.677	1.557	7.217	19.82	18.91	10.713
CIL1436S0049	WRKY	6.01	7.88	16.993	12.62	13.393	9.89
CIL1300S0048	WRKY	0.427	1.203	7.083	5.107	6.923	9.057
CIL1300S0049	WRKY	0.063	0.227	10.15	13.18	28.773	8.48
CIL1031S0012	WRKY	11.093	9.857	64.443	43.98	27.643	7.77
CIL0993S0056	WRKY	2.9	3.187	32.287	18.88	28.01	6.4
CIL1393S0033	WRKY	2.133	2.983	3.743	4.983	7.09	4.217
CIL0919S0024	WRKY	24.933	19.98	41.343	31.253	17.787	4.163
CIL1512S0032	WRKY	2.003	2.4	29.237	13.7	14.63	3.14
CIL1330S0036	WRKY	8.217	6.88	4.893	5.29	4.127	3.06
CIL0899S0061	WRKY	2.55	3.703	6.527	3.983	3.687	2.08
CIL1263S0077	WRKY	0.12	0.303	4.67	7.24	7.747	1.68
CIL1545S0035	WRKY	19.193	16.833	10.223	6.727	5.637	1.43
CIL1031S0068	WRKY	0.3	0.427	10.787	12.653	6.323	0.813
CIL0967S0198	WRKY	5.81	2.28	2.4	1.023	1.63	0.467
CIL1403S0041	zf-HD	14.637	23.183	23.523	15.353	12.133	5.593
CIL1081S0023	zf-HD	11.26	14.387	11.887	11.973	11.733	5.18
CIL0946S0130	zf-HD	2.573	3.737	5.767	5.59	3.89	2.893
CIL0176S0052	zf-HD	15.65	28.75	13.793	7.517	5.49	1.943
CIL0929S0001	zf-HD	5.653	4.56	5.813	4.397	3.947	1.517
CIL0929S0038	zf-HD	0.493	5.33	3.333	2.233	0.597	0.893
CIL0972S0074	zf-HD	2.88	6.127	3.63	2.6	1.593	0.533
